# Supplementary material
Source: publisher figshare collection journal article supplement (https://frontiersin.figshare.com/ndownloader/files/15085712)
Supplement: Supplementary file 1 [file 15085712]

Archive with 1 entries (1 files):
- supplemental_GB_16.csv
