# Supplementary material
Source: publisher figshare collection journal article supplement (https://frontiersin.figshare.com/ndownloader/files/15085712)
Supplement: Supplementary file 1 [file 15085712 › supplemental_GB_16.csv]

COMID	wet_pct	fldpop_EA	fld_pop	dasy_pop	dasypopNA	fldpct_EA	fldpct_NA	fld_pct	wetpct_up	fldpopEAd	fld_popd	dasy_popd	EA_pct_d	fld_pct_d
11227906	0.013576356853799999	0.0	0.0	0.0	0.0	0.415617128463	0.0	0.3786176233159293	0.003565187606831655	0.0009971979307010002	0.429402732647	0.582846564233	0.16031241726257792	0.13906897425074005
11228028	0.0	0.0	0.0	0.0	0.0	0.428571428571	0.0	0.33347457426650184	0.00022212746861933726	0.0	0.0	0.0	0.12993751394789493	0.11231752243457784
11225534	0.054129099360300005	0.0240122759442	0.0179905445675	1.25528966675	0.0	0.06990727325410001	0.0	0.0525638154608204	0.03779719680994113	0.0726124567445808	0.26673116778879075	2.7207016303045206	0.06483011937556897	0.061034328560861134
11227708	0.0025759072818600003	0.0		0.0	0.0	0.0	0.0	0.0	0.0025759072818600003	0.0	0.0	0.0	0.010083663584353659	0.0
11228022	0.0	0.0	0.0	0.0	0.0	0.12969696969699998	0.0	0.12934206312669927	0.00017187376335663966	0.0	0.0	0.0	0.12911888111899802	0.11171127373305256
11228120	0.0	0.0		0.0	0.0	0.09763406940060004	0.0	0.0	0.0	0.0	0.0	0.0	0.2480591834871489	0.03374003563452392
11228308	0.00262091700425	0.0		0.0	0.0	0.295794725588	0.0	0.0	0.0005083144259002972	0.0	0.0	0.0	0.0388232183995099	0.0
11227940	0.0	0.0	0.0	0.0	0.0	0.923913043478	0.0	0.6519149724625084	0.0	0.0	0.0	0.0	0.2781321765760857	0.3271966331136274
11226056	0.0100397330965	0.0	0.0007713788127150001	0.59905190168	0.0	0.07788944723619999	0.0	0.12187844952179612	0.0036919967612190773	0.019256106097597	0.032213993201365	1.6157204405107901	0.08936360586061606	0.0895251834775512
11225562	0.00106168689688	0.0007464956252080001	0.00191600543803	0.00604661456418	0.0	0.0909090909091	0.0	0.23194137560165914	0.0014262064458961975	0.09072907504924653	0.12483397022699068	1.9712655063614608	0.08386238587578497	0.09856242937927236
11228198	0.00032873320490799996	0.0	0.0	0.0	0.0	0.08848748639830001	0.0	0.14320094003711545	0.00028928471666773785	0.0	0.0	0.0	0.1083238862491354	0.13083624770439106
11227896	0.0	0.0	0.0	0.0	0.0	0.334300217549	0.0	0.22078043072670114	0.00018076595872213903	0.0009971979307010002	0.429402732647	0.582846564233	0.15691337737704966	0.13587970520486725
11228072	0.000371528050938	0.0		0.0	0.0	0.0105663567202	0.0	0.0	0.0009596056242166053	0.0	0.0	0.0	0.0633374410735423	0.009732867472289006
11228826	0.014458612946799999	0.0		0.0	0.0	0.0	0.0	0.0	0.007326768321788212	0.0	0.0	0.0	0.01789983844911049	0.0
11227716	0.018226053968799998	0.0		0.0	0.0	0.0	0.0	0.0	0.007908046602588892	0.0	0.0	0.0	0.012720808799059641	0.0
11228842	0.000358024548116	0.0	0.0	0.0	0.0	0.042218928647	0.0	0.003966250865695553	0.000524330374649776	0.0	0.0	0.0	0.16168498168484066	0.08367758634935625
11228110	0.0	0.0		0.0	0.0	0.185512946575	0.0	0.0	0.0	0.0	0.0	0.0	0.3093585293740702	0.04748934955166505
11228142	0.0	0.0		0.0	0.0	0.0520911595292	0.0	0.0	0.00028846643105845534	0.0	0.0	0.0	0.056404827440190035	0.0
11225416	0.00144456872045	0.0	0.0	0.543814443547	0.0	0.0581120943953	0.0	0.03032717686855028	0.002139824905411739	0.019256106097597	0.031442614388649995	1.0166685388307901	0.09048496009818943	0.08636334188501357
11227556	0.0044271248328	0.184570800657	0.0668113584561	1.86213917527	0.0	0.0980286157062	0.0	0.10065069198628902	0.00497155508861136	0.460330524174	1.0010399279650999	9.19325158344	0.10515380736259364	0.10425169543534343
11228252	0.0	0.0		0.0	0.0	0.0073124311329300015	0.0	0.0	0.0012024529717000554	0.0	0.0	0.0	0.02444568511726984	0.0
11225408	0.0021100443551500003	0.0113509678049	0.0113509678049	0.0168207286824	0.0	0.443001443001	0.0	0.27996745773959725	0.0011846539142213953	0.020472281219547004	0.03934775268135	0.5839005087817901	0.09554140127383977	0.12050322824812873
11225548	0.0109586231134	0.0654726397297	0.0989554552198	0.68245652824	0.0	0.18600000000000005	0.0	0.292567539149527	0.002317956329850016	0.0946108523003285	0.2355243350558485	2.1711803422955485	0.08322096974271456	0.08479393508946746
11225558	0.0182009722236	7.46495625208e-05	0.000298598250083	0.000298598250083	0.0	0.25	0.0	1.0	0.0001235688003950259	0.0899825794240385	0.12291796478896068	1.9652188917972808	0.08371892158674839	0.0958469594395236
11228850	0.0	0.0	0.0	0.0	0.0	0.5	0.0	0.6068835278506252	0.000355316230458472	0.0	0.0	0.0	0.3244303432359572	0.1922661751838903
11227882	0.000111675011981	0.0009971979307010002	0.429402732647	0.582846564233	0.0	0.128338914415	0.0	0.12220342214732398	0.0001086007670754683	0.0009971979307010002	0.429402732647	0.582846564233	0.20974007954864296	0.15653323927914162
11228134	3.10215933235e-05	0.0		0.0	0.0	0.0230298668586	0.0	0.0	1.5844331528396708e-05	0.0	0.0	0.0	0.15208774292867333	0.0
11228074	0.0	0.0		0.0	0.0	0.102628285357	0.0	0.0	0.010197628782671695	0.0	0.0	0.0	0.08862590781524697	0.014396961424317315
11228790	0.0032305995201999996	0.0		0.0	0.0	0.0155107017069	0.0	0.0	0.005188842984892187	0.0	0.0	0.0	0.06985476834710717	0.019933540287797525
11225430	0.0027487203033	0.0404136121106	0.0500317929818	0.590588635201	0.0	0.044344231491900005	0.0	0.04754764537249302	0.005396493552449718	0.055089094556047005	0.06862172586076501	2.21172974059019	0.07693108473867721	0.06650518258693258
11225444	0.014896343773100004	0.00206530456308	0.0778163585328	0.185507470367	0.0	0.152854511971	0.0	0.2245238673113066	0.0064515653041803895	0.043573776923980005	0.13103319951548498	2.3749436942260003	0.05345211581294986	0.0579194802486508
11228248	0.007828258209329999	0.0		0.0	0.0	0.0357781753131	0.0	0.0	0.004813201038263775	0.0	0.0	0.0	0.06758957654727228	0.0864253860815574
11228006	0.014769339219400001	0.0	0.0	0.0	0.0	0.131570996979	0.0	0.10546989093385954	0.014221531001080437	0.0	0.0	0.0	0.15508965127784785	0.13563379812789272
11225556	0.0097136170364	0.00032348143759	0.00228925325064	0.00383201087607	0.0	0.077380952381	0.0	0.5672930356867083	0.00031473255260774973	0.0899079298615177	0.1226193665388777	1.9649202935471977	0.08359572760385285	0.09517709239706353
11225570	0.00473729994962	0.000572313312659	0.148526789024	0.160893733215	0.0	0.0172672672673	0.0	0.21479011288424246	0.005666353755624371	0.09130138836190548	0.2733607592509907	2.1321592395764606	0.07889877455092892	0.10722536231131982
11227770	0.0006122177276039999	0.0		0.0	0.0	0.0	0.0	0.0	0.0006122177276039999	0.0	0.0	0.0	0.033279925228616884	0.0031264775416716896
11227914	0.000202871056179	0.0	0.0	0.0	0.0	0.122980421973	0.0	0.10727315110982318	0.014319836510755038	0.0009971979307010002	0.429402732647	0.582846564233	0.15067013599111298	0.13085660125528795
11228068	0.00042455488061900003	0.0	0.0	0.0	0.0	0.08544854272430001	0.0	0.017663863956328973	0.000313957955270309	0.0	0.0	0.0	0.10274879048885678	0.05447145240932906
11225538	0.9186800969410001	9.95327500277e-05	9.95327500277e-05	9.95327500277e-05	0.0	1.0	0.0	1.0	0.012770442422437123	0.0291382125706285	0.13656887983604848	1.4887238140555483	0.07079378513993535	0.0596716808049551
11227714	0.016982226188299997	0.0		0.0	0.0	0.0	0.0	0.0	0.008827341161674902	0.0	0.0	0.0	0.01470871603832434	0.0
11227758	0.0	0.0	0.0	0.0	0.0	1.0	0.0	1.0	0.010721630822757105	0.0	0.0	0.0	0.0990467484981244	0.0772589467213435
11228108	0.0	0.0		0.0	0.0	0.338124572211	0.0	0.0	0.0	0.0	0.0	0.0	0.2860622933705385	0.08177221094877006
11228128	0.0	0.0		0.0	0.0	0.110294117647	0.0	0.0	2.784228910948643e-05	0.0	0.0	0.0	0.213055303717216	0.0
11227970	0.0039234560522	0.0	0.0	0.0	0.0	0.407843137255	0.0	0.5227593280228059	0.014176900760070615	0.0	0.0	0.0	0.4913606911447441	0.5669190370576979
11225426	0.00244494454525	0.0010948602503	0.00241366918817	0.455981243431	0.0	0.0215792054929	0.0	0.04799296693209901	0.002616933330818309	0.020350966347897	0.034627662389535005	2.0717016839417903	0.076775956284134	0.08181259790959336
11228034	0.0	0.0	0.0	0.0	0.0	0.246305418719	0.0	0.22571326477061665	0.00032024446161640517	0.0	0.0	0.0	0.13297987448614804	0.11546734452627246
11227588	4.71424278373e-05	0.00124415937535	0.0014183416879	0.00306063206335	0.0	0.535580524345	0.0	0.4720122138491114	0.003894576132082286	0.19285690209681	0.07450026339575001	3.25111750575335	0.0917112883837952	0.0914101215983266
11228062	0.0017354951142699998	0.0		0.0	0.0	0.0220664383016	0.0	0.0	0.002526911947773497	0.0	0.0	0.0	0.03120511448452084	0.0
11227994	0.00677264361118	0.0		0.0	0.0	0.0	0.0	0.0	0.006772643611179999	0.0	0.0	0.0	0.0	0.0
11227792	0.0187111096846	0.0	0.0	0.0	0.0	0.312149170914	0.0	0.1833947526570945	0.016513124302563225	0.0	0.0	0.0	0.17064446901195796	0.11291823995578898
11227778	0.00731170602543	0.0		0.0	0.0	0.0	0.0	0.0	0.001143487255241786	0.0	0.0	0.0	0.04133841943771892	0.0038835315612157093
11225490	0.0069293660864300005	0.00495175431388	0.118404152956	0.233259964993	0.0	0.0728937728938	0.0	0.09320086577787454	0.046327342140989006	0.048525531237860006	0.24943735247148496	2.064389215672	0.0577032728931818	0.07957030599312813
11225492	0.0	7.46495625208e-05	7.46495625208e-05	7.46495625208e-05	0.0	1.0	0.0	1.0	0.05411733813062803	0.0486001808003808	0.2487406232212908	1.4654119635545209	0.05604312938820162	0.07569417846469294
11227788	0.010732125567199999	0.0	0.0	0.0	0.0	0.107252726764	0.0	0.03365120546953718	0.007674183920562749	0.0	0.0	0.0	0.10242675574990212	0.05929710513596063
11228010	0.0	0.0	0.0	0.0	0.0	0.060784313725500014	0.0	0.13114049336545064	0.0	0.0	0.0	0.0	0.14364450568391593	0.12836471880937833
11228078	0.000140772199599	0.0	0.0	0.0	0.0	0.34159938485200003	0.0	0.1420298539647837	5.855097004189638e-05	0.0	0.0	0.0	0.1787976019590503	0.12130109332721545
11227578	0.0068832110244	0.007041942064460001	0.00627056325175	1.38591769842	0.0	0.0575087310827	0.0	0.04973155754876277	0.004686664426951596	0.19161274272145998	0.07308192170785001	3.24805687369	0.08844978947079628	0.08861350221227493
11230124	0.009362697054040001	0.0		0.0	0.0	0.0540441176471	0.0	0.0	0.008552568410108357	0.0	0.0	0.011520226053132	0.04520912241120073	0.0
11230094	0.00713667356974	0.0		0.000376170646632	0.0	0.0401311327154	0.0	0.0	0.007891160535086528	0.0	0.0	0.000376170646632	0.051660130719011495	0.0
11228820	0.12338572722300001	0.0	0.0	0.0	0.0	0.5943033102390001	0.0	0.6721171196130202	0.014301602539723119	0.0	0.0	0.0	0.22097217976156472	0.18743430588368445
11227944	0.0	0.0	0.0	0.0	0.0	0.7105263157889999	0.0	0.8972234515880697	0.0005750621614756443	0.0	0.0	0.0	0.8881987577637143	0.7767462259501966
11225552	0.022047412225	0.0	0.00328458075091	0.0232425549311	0.0	0.0	0.0	0.5952585911296481	0.016720734611414396	0.0895844484239277	0.1203301132882377	1.9610882826711282	0.08366086468273733	0.09022884369329782
11227996	0.0014139893414900002	0.0		0.0	0.0	0.0	0.0	0.0	0.003221321120392537	0.0	0.0	0.0	0.014703540527628046	0.0
11230048	0.0	0.0		0.0	0.0	0.466346153846	0.0	0.0	0.007426240672213319	0.0	0.0	0.0	0.05498269397176104	0.0
11230040	0.0	0.0		0.0	0.0	0.122972972973	0.0	0.0	0.0008443877199164263	0.0	0.0	0.0	0.044028233978638885	0.0
11228008	0.0	0.0	0.0	0.0	0.0	0.0233364140481	0.0	0.0067121105029158655	0.0	0.0	0.0	0.0	0.07848772232342632	0.06107009927286222
11230140	0.00817310398588	0.0		0.0	0.0	0.0	0.0	0.0	0.004912042619384103	0.0	0.0	0.011520226053132	0.03663673469391608	0.0
11227936	0.00286213944877	0.0		0.0	0.0	0.0	0.0	0.0	0.00286213944877	0.0	0.0	0.0	0.0039113428943941975	0.0
11227992	0.0	0.0		0.0	0.0	0.0	0.0	0.0	0.005225019436205872	0.0	0.0	0.0	0.04599899345751944	0.0
11230114	0.000206592581846	0.0		0.0	0.0	0.0	0.0	0.0	0.000206592581846	0.0	0.0	0.000376170646632	0.03271527901590568	0.0
11230062	0.0459746115104	0.0		0.0	0.0	0.0	0.0	0.0	0.00897378358507241	0.0	0.0	0.0	0.0355847688123349	0.0
11230138	0.0573245405258	0.0		0.0	0.0	0.0	0.0	0.0	0.057324540525800015	0.0	0.0	0.0	0.014072372199895848	0.0
11230176	0.05286445738	0.0		0.0	0.0	0.0259365994236	0.0	0.0	0.022736480791778143	0.0	0.0	0.0617390073785	0.04425204425207662	0.0
946040185	0.165170472306	0.0		0.0	0.0	0.226155358899	0.0	0.0	0.0467261804030366	0.0	0.0	0.0567312356452	0.1895587040883587	0.0303720121970267
11230238	0.0039502739353499995	0.0		0.00387925979339	0.0	0.0	0.0	0.0	0.006523239278161807	4.7021330829e-05	0.0	0.09133893513539	0.00024116724948759668	0.0
11230300	0.00680069473174	0.0		0.0687922070028	0.0	0.0	0.0	0.0	0.00680069473174	0.0002115959887305	0.0	0.1775760558758	0.0008163265306131374	0.0
11228176	0.0	0.0		0.0	0.0	0.011593269463	0.0	0.0	0.0	0.0	0.0	0.0	0.03815597278135375	0.0
11228024	0.0	0.0		0.0	0.0	0.0	0.0	0.0	0.0	0.0	0.0	0.0	0.017474526235589004	0.0
11227926	0.00422927624363	0.0		0.0	0.0	0.0	0.0	0.0	0.0046058152340139715	0.0	0.0	0.0	0.004727116458960586	0.0
11230100	0.00168457041628	0.0		0.0	0.0	0.0	0.0	0.0	0.003050990929251341	0.0	0.0	0.000376170646632	0.035669161240201176	0.0
11228306	0.0	0.0		0.0	0.0	0.0	0.0	0.0	0.0	0.0	0.0	0.0	0.0001237164419150929	0.0
11228342	0.0	0.0		0.0	0.0	0.0	0.0	0.0	0.0	0.0	0.0	0.0	0.0001307018690366875	0.0
11230102	0.00418239853823	0.0		0.0	0.0	0.0	0.0	0.0	0.00418239853823	0.0	0.0	0.0	0.0038492381716123494	0.0
11230096	0.000249574647958	0.0		0.0	0.0	0.212389380531	0.0	0.0	0.0016283838182826387	0.0	0.0	0.000376170646632	0.043321687718401496	0.0
11230112	0.0	0.0029153225114		0.00380872779715	0.0	0.551282051282	0.0	0.0	0.0	0.02995258773811	0.0	0.4684578050272501	0.059658134051892485	0.0
11227932	0.00846403778972	0.0		0.0	0.0	0.0	0.0	0.0	0.005232173362248846	0.0	0.0	0.0	0.0043438199289198174	0.0
11230022	0.0	0.0		0.0	0.0	0.000225631768953	0.0	0.0	0.0	0.0	0.0	0.0	0.036211699164366055	0.0
11228350	0.0	0.0		0.0	0.0	0.0	0.0	0.0	0.0	0.0	0.0	0.0	0.0697121401752201	0.0
11228070	0.0	0.0		0.0	0.0	0.0460546205785	0.0	0.0	0.0	0.0	0.0	0.0	0.07518639084325482	0.013062411629366557
11230262	0.0010319312487699999	0.0		0.0182442763617	0.0	0.0	0.0	0.0	0.005852619824233169	0.0002115959887305	0.0	0.10878384887299998	0.0015509219369308706	0.0
11227990	0.0	0.0		0.0	0.0	0.0	0.0	0.0	0.0	0.0	0.0	0.0	0.030315091210643814	0.0
11230252	0.000306016179119	0.000188085323316		0.07029688958939999	0.0	0.00204708290686	0.0	0.0	0.0037185126030944296	0.0009874479474095	0.0	0.16894764166866	0.028307645353289793	0.0
11230014	0.0	0.0		0.0	0.0	0.236	0.0	0.0	0.0	0.0	0.0	0.0	0.0419327067939116	0.0
11230196	0.0	2.35106654145e-05		0.0202426829219	0.0	0.00115207373272	0.0	0.0	0.004239190038390537	0.0007993626240934999	0.0	0.09865075207926	0.03946510110895925	0.0
11230036	0.0	0.0		0.0	0.0	0.0	0.0	0.0	0.0	0.0	0.0	0.0	0.02787517531557088	0.0
11227910	0.000421690689148	0.0		0.0	0.0	0.0014976174268199998	0.0	0.0	0.0004216906891480001	0.0	0.0	0.0	0.02233381017722059	0.002901413604768275
11227912	0.0	0.0		0.0	0.0	0.000536912751678	0.0	0.0	0.0	0.0	0.0	0.0	0.03199072483684093	0.004267524914296107
11228030	0.00022290165212899998	0.0		0.0	0.0	0.0145814069279	0.0	3.984575096819978e-05	0.00022290165212899998	0.0	0.0	0.0	0.07922959072011428	0.062962807226659
11230186	0.0180357578259	0.0		0.0	0.0	0.0	0.0	0.0	0.0180357578259	0.0	0.0	0.050594951972	0.0259677971908366	0.0
11230188	0.0529855583383	0.0007758519586789999		0.0215592801851	0.0	0.07357512953369999	0.0	0.0	0.008100612135053786	0.0007758519586789999	0.0	0.07840806915736001	0.046063348416318387	0.0
11228132	0.0	0.0		0.0	0.0	0.578947368421	0.0	0.0	0.0	0.0	0.0	0.0	0.059240797546005586	0.0
11228014	0.0	0.0		0.0	0.0	0.0	0.0	0.0	0.0	0.0	0.0	0.0	0.018504512680877338	0.0
11227968	0.00198046746811	0.0		0.0	0.0	0.00723842948015	0.0	0.0	0.0031871877047077953	0.0	0.0	0.0	0.0325434022047965	0.0
11227956	0.014402300465	0.0		0.0	0.0	0.0	0.0	0.0	0.014402300465	0.0	0.0	0.0	0.01845436375749399	0.0
11230172	0.153094729198	0.0		0.00625383700026	0.0	0.121835443038	0.0	0.0	0.02114370699561548	0.0	0.0	0.06799284437875999	0.04851287005731203	0.0
11227988	0.005235140539229999	0.0		0.0	0.0	0.0006456820016139999	0.0	0.0	0.005235140539229999	0.0	0.0	0.0	0.028580285182917182	0.0
11228054	0.0104241835929	0.0		0.0	0.0	0.0	0.0	0.0	0.01116460626793184	0.0	0.0	0.0	0.023979091800054902	0.0
11228018	0.015698612344	0.0		0.0	0.0	0.0	0.0	0.0	0.011716983081687444	0.0	0.0	0.0	0.018653113087666595	0.0
11230160	0.0229602121938	0.0		0.050594951972	0.0	0.0317837516709	0.0	0.0	0.029353839372654025	0.0	0.0	0.062115178025132015	0.04234414123169945	0.0
11230116	0.00964071987249	0.0		0.0111440554065	0.0	0.0601452564685	0.0	0.0	0.008923278635365723	0.0	0.0	0.011520226053132	0.04572451742514926	0.0
11228348	0.0	0.0		0.0	0.0	0.0713664055701	0.0	0.0	0.0	0.0	0.0	0.0	0.04017663240193526	0.0
11228352	0.0	0.0		0.0	0.0	0.0	0.0	0.0	0.0	0.0	0.0	0.0	0.0	0.0
11230076	0.0	0.0		0.0014811719211099998	0.0	0.0772151898734	0.0	0.0	0.0008942544778158703	0.0	0.0	0.0014811719211099998	0.11054421768714176	0.0
11230228	0.0015187484774699998	4.7021330829e-05		0.087459675342	0.0	0.00028409090909099993	0.0	0.0	0.0036537478921974545	0.0004937239737049998	0.0	0.1713692402064	0.0019006244909038508	0.0
11228166	0.00033662457384699997	0.0		0.0	0.0	0.0099506647713	0.0	0.0	0.00033662457384699997	0.0	0.0	0.0	0.015979362975172842	0.0
11227966	0.00019104551451299998	0.0		0.0	0.0	0.0	0.0	0.0	0.00018242553104676367	0.0	0.0	0.0	0.01621602566363938	0.0
11230162	0.018368638699900002	0.0028683011805700005		0.0685273089039	0.0	0.223443223443	0.0	0.0	0.0018394929349039664	0.022640770794169995	0.0	0.3552664884681501	0.0815363881401327	0.0
11230056	0.156125444018	0.0		0.0	0.0	0.08771929824560001	0.0	0.0	0.156125444018	0.0	0.0	0.0	0.024037521985551258	0.0
11230104	0.019878303689400002	0.0106503314328		0.324864069771	0.0	0.0341758852976	0.0	0.0	0.01977564291412121	0.5054948219913099	0.0	1.0815673936025	0.057303729734058874	0.0
11230282	0.0	0.0		0.00912213818083	0.0	0.0	0.0	0.0	0.0	0.000188085323316	0.0	0.12646386926463	0.0009506833036255351	0.0
11230290	0.00291075972233	0.0		0.08564935410499999	0.0	0.0	0.0	0.0	0.00291075972233	0.000188085323316	0.0	0.2029910851888	0.0005721232925701838	0.0
11230280	0.000979669767191	0.0		0.0289181184598	0.0	0.0	0.0	0.0	0.0005455896628390525	0.000188085323316	0.0	0.11734173108380001	0.0011489300588839407	0.0
11227986	0.0	0.0		0.0	0.0	0.00458015267176	0.0	0.0	0.00018425651646579864	0.0	0.0	0.0	0.043437204910336	0.0
11228146	0.0	0.0		0.0	0.0	0.0367454068241	0.0	0.0	0.0	0.0	0.0	0.0	0.2688606974322045	0.04528033954310258
11228056	0.0036709776546299997	0.0		0.0	0.0	0.0	0.0	0.0	0.0036709776546299997	0.0	0.0	0.0	0.02313122400099837	0.0
11228832	0.0161575120394	0.0		0.0	0.0	0.0335558196946	0.0	0.0	0.014521237707200587	0.0	0.0	0.0	0.07538792913979936	0.01093615947483034
11230034	0.00237694823198	0.0		0.0	0.0	0.0	0.0	0.0	0.00237694823198	0.0	0.0	0.0	0.01861390774994337	0.0
11230038	0.018134807984799998	0.0		0.0	0.0	0.0	0.0	0.0	0.005707160719979748	0.0	0.0	0.0	0.025286259541987325	0.0
11228290	0.000260799564113	0.0		0.0	0.0	0.0	0.0	0.0	0.000260799564113	0.0	0.0	0.0	0.01960549910339821	0.0
11227958	0.034883933730900006	0.0		0.0	0.0	0.0	0.0	0.0	0.013271239613824431	0.0	0.0	0.0	0.01926688460735792	0.0
11228210	0.0	0.0		0.0	0.0	0.0	0.0	0.0	0.0	0.0	0.0	0.0	0.0778688524590525	0.12601660783486776
11230136	0.0012810845800000001	0.0		0.0	0.0	0.0	0.0	0.0	0.0012810845800000001	0.0	0.0	0.0	0.01234982777452004	0.0
11228204	0.0	0.0		0.0	0.0	0.0125677673731	0.0	0.0	0.0	0.0	0.0	0.0	0.049629554450417904	0.0
11228152	0.0	0.0		0.0	0.0	0.031231384563	0.0	0.0	0.0	0.0	0.0	0.0	0.1304468114538624	0.06500828556129222
11230264	0.0	0.0		0.0133070366246	0.0	0.0	0.0	0.0	0.0	0.000188085323316	0.0	0.1017306492486	0.0011929615269920784	0.0
11228060	0.0017299676385699998	0.0		0.0	0.0	0.0072327700118199984	0.0	0.0	0.0017299676385699994	0.0	0.0	0.0	0.025224935732697632	0.0
11230266	0.0	0.0		0.0181267230346	0.0	0.0	0.0	0.0	0.0003966934380127746	0.0002115959887305	0.0	0.1086662955459	0.0014985014985031367	0.0
11230054	0.010126337224899999	0.0		0.0	0.0	0.00138312586445	0.0	0.0	0.007158591342485548	0.0	0.0	0.0	0.02797325826882764	0.0
11230166	0.0009349163763630001	0.0		0.0	0.0	0.0	0.0	0.0	0.000934916376363	0.0	0.0	0.0111440554065	0.02258648100434861	0.0
11230072	0.0040269086181	0.0		0.0	0.0	0.0	0.0	0.0	0.0050576375637786134	0.0	0.0	0.0	0.03299705758722606	0.0
11230142	0.00461646300052	0.0		0.0	0.0	0.0	0.0	0.0	0.00394777396748321	0.0	0.0	0.0111440554065	0.02783783783785966	0.0
11230200	0.0028224431916300005	0.0		0.0	0.0	0.0	0.0	0.0	0.0028224431916300005	0.0	0.0	0.050594951972	0.031420991543712494	0.0
11230146	0.00808214904239	0.00362064247383		0.0446263712729	0.0	0.07006369426749999	0.0	0.0	0.003916435375703853	0.0304228010464	0.0	0.61160324933525	0.05085978114662607	0.0
11230086	0.107775046175	0.00472564374832		0.0420025858421	0.0	0.115971515768	0.0	0.0	0.02539684298096966	0.5402093236207101	0.000329149315803	3.9416381025015013	0.10540513537813526	0.006580518148259561
11230044	0.011391136329900001	0.0		0.0	0.0	0.0482445061884	0.0	0.0	0.005184217580190149	0.0	0.0	0.0	0.17348178137661402	0.016796139018842794
11230130	7.91085608688e-05	0.00338553581969		0.0891336250606	0.0	0.0910240202276	0.0	0.0	2.8327239315174653e-05	0.02680215857257	0.0	0.5669768780623501	0.04919198704019432	0.0
11230064	0.0874695617866	0.00987447947409		0.0781259411724	0.0	0.0815207111784	0.0	0.0	0.09297357148018807	0.53548367987239	0.000329149315803	3.8996355166594	0.10425437624637847	0.007297186588292706
11228324	0.0017304462804000002	0.26792749477		0.275427397037	0.0	0.213849287169	0.0	0.0	0.00268050668068995	0.3132923278322	0.000329149315803	3.4608794103461187	0.18454315637418006	0.05117114514536618
11230042	0.000981686536163	0.0		0.0	0.0	0.0	0.0	0.0	0.000981686536163	0.0	0.0	0.0	0.07994563202768183	0.0
11230012	0.0181476374717	0.167304042297		0.192284221475	0.0	0.102040816327	0.0	0.0	0.003098124994514807	0.4805963701292	0.000329149315803	3.652646397182001	0.1142857142856908	0.01116819095310385
11230174	5.442246829899999e-05	0.00404383445129		0.042460261738599986	0.0	0.09095716552089997	0.0	0.0	1.104926857992366e-05	0.02489779467396	0.0	0.37807026976215	0.07778346370346291	0.0
11230156	0.0	0.0004467026428759999		0.08390956486439999	0.0	0.00473933649289	0.0	0.0	0.0009676884135567742	0.0004467026428759999	0.0	0.17148679353340995	0.02769811024240059	0.0
11230236	0.007332254478799999	0.0		0.00961586215453	0.0	0.0	0.0	0.0	0.004841596370839768	4.7021330829e-05	0.0	0.10095479728992	0.00016289297931264369	0.0
11228294	0.0020591940327899998	0.0453648330622	0.000329149315803	3.18493477867	0.0	0.110065429775	0.0	0.011806830894672396	0.002137460443900311	0.0453648330622	0.000329149315803	3.18545201330912	0.1838788606251262	0.05233106538295332
11228840	0.0	0.0	0.0	0.000517234639119	0.0	0.262281035796	0.0	0.09537456159256397	0.0010754819857130024	4.232163629496998	3.5171616822500003	5.47757098587212	0.2426875880107684	0.13293304168477896
11230126	0.0006568870962730001	0.008064158237180001		0.129513974989	0.0	0.0474543442169	0.0	0.0	0.00043140312280060965	0.03801674597529	0.0	0.5979717800162501	0.05681084570691749	0.0
11230028	0.000817425680962	0.0450128302691		0.168863178305	0.0	0.10618556701	0.0	0.0	0.08210266531148451	0.5256092003983001	0.000329149315803	3.821509575487	0.1136701919310163	0.010319530927681935
11228190	0.00169555258976	0.0	0.0	0.0	0.0	0.680555555556	0.0	0.2725075167752471	0.005025124658439639	4.232163629496998	3.5171616822500003	5.477053751233	0.22834645669336384	0.16042340994403795
11228058	0.0	0.0		0.0	0.0	0.00904704463209	0.0	0.0	0.0	0.0	0.0	0.0	0.02921132618787159	0.0
11228192	0.00102719969614	0.0		0.0	0.0	0.0022349936143	0.0	0.0	0.00102719969614	0.0	0.0	0.0	0.18128007699718074	0.0
11230244	0.0051005235948799995	0.000188085323316		0.0972871334852	0.0	0.004447565543069999	0.0	0.0	0.008607634926528421	0.0009874479474095	0.0	0.19593788556446	0.0283593170007574	0.0
11230060	0.0	0.0		0.0	0.0	0.0	0.0	0.0	0.0	0.0	0.0	0.0	0.010997916184303428	0.0
11228824	0.006964803087310001	0.0		0.0	0.0	0.0	0.0	0.0	0.014892783754521743	0.0	0.0	0.0	0.02017773892773781	0.0
11227950	0.014481174125700004	0.0		0.0	0.0	0.0	0.0	0.0	0.015536393369595327	0.0	0.0	0.0	0.019478236410940496	0.0
11228184	0.0105747181519	0.157346706837	0.0	0.173544161953	0.0	0.287653522948	0.0	0.14339277885752408	0.0062672593776655645	4.498264677825298	3.7462399760284	6.000000159251701	0.19837660065761195	0.15712259698910702
11228158	0.00398587913724	4.0748169226599975	3.5171616822500003	5.30350958928	0.0	0.196410043578	0.0	0.16778687779843346	0.002609421486531661	4.340917970988298	3.7462399760284	5.8264559972987	0.18753923414919774	0.15878926590385584
11228116	0.07988728571130001	0.189741617069	0.134207485244	0.279984581284	0.0	0.1809095098	0.0	0.15062501300403044	0.05380386148599614	0.189741617069	0.134207485244	0.279984581284	0.17333239284260918	0.15446694274329176
11228846	0.125578654556	0.0578480539843	0.0740455091	0.164288473316	0.0	0.491452991453	0.0	0.5688055044263913	0.004533385149159075	0.26610104832829995	0.2290782937784001	0.5229464080187001	0.18454920612671769	0.1557564973705993
11230110	0.00114801203438	0.0		0.08609605674789997	0.0	0.0191570881226	0.0	0.0	0.0009409548816283858	0.0	0.0	0.08757722866900998	0.05507134322065618	0.0
11228844	0.060590231725699994	0.018511377275	0.0208252994344	0.07867335341869999	0.0	0.394557823129	0.0	0.4831109244655074	0.00507899571969152	0.208252994344	0.15503278467839998	0.3586579347027	0.1820169252463809	0.15234840612761427
11228822	0.053450160671199995	0.0	0.0	0.0	0.0	0.256585879874	0.0	0.3138361311787858	0.059649821843563676	0.0	0.0	0.0	0.2024188415023145	0.17948917294212904
11230106	0.0	0.0017868105715		0.0196564804446	0.0	0.904761904762	0.0	0.0	0.0	0.02703726522671	0.0	0.4646490772301	0.05476656178248841	0.0
11227756	0.0034721722550900003	0.0	0.0	0.0	0.0	0.477290223249	0.0	0.4613769374867459	0.00341693315103175	0.0	0.0	0.0	0.09842866943237877	0.0766259206157327
11227742	0.004091994972749999	0.0	0.0	0.0	0.0	0.123410770152	0.0	0.05985769052657136	0.004037471225294324	0.0	0.0	0.0006718460626869999	0.08095286417358187	0.0754986524556477
11230204	0.00653297009887	0.0		0.0383929166219	0.0	0.0	0.0	0.0	0.003401608945547268	0.0	0.0	0.09672287751527	0.030774013055660725	0.0
11230240	0.0014362193275499998	0.0		0.051629421250300005	0.0	0.0	0.0	0.0	0.0014362193275499998	0.0	0.0	0.14835229876557002	0.022756876867686897	0.0
11227962	0.0	0.0		0.0	0.0	0.0	0.0	0.0	0.0	0.0	0.0	0.0	0.01886278515491896	0.0
11228064	0.0	0.0		0.0	0.0	0.636363636364	0.0	0.0	0.0017286452171645606	0.0	0.0	0.0	0.03649031134343133	0.0
11230058	0.0	0.0		0.0	0.0	0.00172711571675	0.0	0.0	0.0	0.0	0.0	0.0	0.11113007852509764	0.0
11230180	0.11845768447699999	0.0		0.0014811719211099998	0.0	0.0394736842105	0.0	0.0	0.0064773253508903575	0.0	0.0	0.05832996089337	0.04337208166457885	0.0
11227972	0.0157220079519	0.0		0.0	0.0	0.0	0.0	0.0	0.01504256654352539	0.0	0.0	0.0	0.02115795905896615	0.0
11227946	0.034545736069	0.0		0.0	0.0	0.0	0.0	0.0	0.034545736069	0.0	0.0	0.0	0.019882285386160263	0.0
11227952	0.215876177191	0.0		0.0	0.0	0.0	0.0	0.0	0.215876177191	0.0	0.0	0.0	0.019457712840684517	0.0
11227706	0.0	0.0	0.0	0.0	0.0	0.0377213240955	0.0	0.0592781390854664	0.0020972311843485	0.00644474556429	0.00731565712704	0.009978926269467	0.10684912329827216	0.10570829043175203
11230026	0.0	0.0		0.0	0.0	0.219047619048	0.0	0.0	0.006676291708747889	0.0	0.0	0.0	0.045514901150813684	0.0
946040245	0.0	0.0	0.0	0.0	0.0	0.03125	0.0	0.9295482717778	0.04278916372248456	0.00644474556429	0.00731565712704	0.009978926269467	0.17600112013448127	0.1521546942813093
11228346	0.0	0.0		0.0	0.0	0.535211267606	0.0	0.0	0.006601936146187717	0.0	0.0	0.0	0.042784354862906514	0.0
946040244	0.00024323538832900002	0.0	0.0	0.0006718460626869999	0.0	0.0791145523129	0.0	0.11911782049105818	0.00024246519909225668	0.029735409070790007	0.03508529438474	0.5295647646014671	0.13156641802897626	0.12440988408844755
11225422	0.0	0.0		0.0	0.0	0.0	0.0	0.0	0.0	0.040438495298106905	0.15381624437779998	0.7560160136399999	0.014219142071925525	0.03753799200469751
11227528	0.0	0.0		0.084329122461	0.0	0.0	0.0	0.0	0.0	9.95327500277e-05	0.0	0.09818905790239996	0.0007517383950388497	0.0
11227610	0.0	0.0		0.000373391827452	0.0	0.0	0.0	0.0	0.0	0.00093347956863	0.098767444938842	0.189814890087452	0.004558577723749882	0.03494464872802587
11225450	0.023847401008599996	0.000223948687562	0.113402632267	0.160771924186	0.0	0.0882352941176	0.0	0.6120952775907328	0.005060329045496123	0.04379772561154202	0.24443583178248496	1.991901174865	0.0514574173587742	0.08235586516762705
11225560	0.0	0.0		0.154381721561	0.0	0.0	0.0	0.0	0.0	0.0004230141876177	0.006220796876729999	0.336764893755253	0.001965545149729322	0.029403736393795024
11225428	0.00716762210144	2.48831875069e-05	2.48831875069e-05	7.46495625208e-05	0.0	0.333333333333	0.0	0.2760622008005605	0.007167622101439998	0.04153335554840689	0.05324172417019191	2.1895108734215207	0.04747440656992353	0.04781578421834747
11225554	0.00348251829702	2.48831875069e-05	0.0567860237534	0.173415669749	0.0	0.00137931034483	0.0	0.13194963844139904	0.000394602566121582	0.0896093316114346	0.17383155629072772	2.111261397489028	0.08117099135060779	0.08530753491745195
11227662	0.002597198181	0.0		0.000895794750249	0.0	0.0	0.0	0.0	0.0026922076427529354	0.0	0.0	0.010724653815488	0.002336696760485502	0.00019944602424345383
11225442	9.34567706499e-05	0.0		0.0	0.0	0.0	0.0	0.0	9.34567706499e-05	0.04270286536124202	0.2412507837816	0.936868029754	0.02678913126676797	0.043605484933421285
11230220	0.0031975000955199997	0.0		0.0382048312986	0.0	0.0	0.0	0.0	0.00522400551623263	2.35106654145e-05	0.0	0.1008372439628	6.89464975178935e-05	0.0
11228340	0.321892238053	0.0		0.0	0.0	0.90099009901	0.0	0.0	0.008417791043884671	0.0	0.0	0.0567312356452	0.1912183503342504	0.03485240689227493
11230098	0.0021754962592	0.0		0.0297174810839	0.0	0.0555993690852	0.0	0.0	0.004821469481714297	0.0	0.0	0.0297174810839	0.11947639225185465	0.012556435646653057
11230178	0.007443148752	2.35106654145e-05		0.0626324126642	0.0	9.76753272123e-05	0.0	0.0	0.006194394120964169	2.35106654145e-05	0.0	0.0923498937481	0.02772053772938221	0.0
11228286	0.13190326604900002	0.0		0.0	0.0	0.13625304136299998	0.0	0.0	0.013135884399569564	0.0	0.0	0.0567312356452	0.1837161843967013	0.03522079086968268
11228278	0.273915433011	0.0		0.0	0.0	0.331550802139	0.0	0.0	0.21307082550737752	0.0	0.0	0.0567312356452	0.18475935828904624	0.03599489488291475
11225542	0.0	0.0		0.0732093716069	0.0	0.0	0.0	0.0	0.0	0.000895794750249	0.0311027618991	0.4240020282809001	0.0023526336426589025	0.013647144490286835
11225476	0.0326793743667	0.0		0.0	0.0	0.0	0.0	0.0	0.0326793743667	0.04270286536124202	0.2412507837816	0.936868029754	0.03202684154341835	0.05620815998730142
11225452	0.0008580019496689999	0.0		0.0	0.0	0.0	0.0	0.0	0.0008580019496689999	0.0	0.0	0.0	0.0	0.003990321530762147
11227522	0.0298986387547	0.0		0.0139594681914	0.0	0.0	0.0	0.0	0.0298986387547	0.0	0.0	0.13426967978746698	0.0	0.0
11227672	0.0	0.0		0.0	0.0	0.0	0.0	0.0	0.0003959505763798991	0.0	0.0	0.05392400308119999	0.0	0.0
11225464	0.0	0.0		0.0	0.0	0.0	0.0	0.0	0.0	0.0	0.0	0.009880763707765	0.0	0.0
11227538	0.0749710583967	0.0		0.000995327500277	0.0	0.0	0.0	0.0	0.013957831561525124	0.0	0.0	0.07736182995907699	0.0	0.0
11228276	0.021294896653	0.0		0.0	0.0	0.0	0.0	0.0	0.005714837812305675	0.0	0.0	0.0567312356452	0.15954858414893244	0.02464323651700533
11230024	0.0	0.0		0.0	0.0	0.11312849162	0.0	0.0	0.0	0.0	0.0	0.0	0.2918050941306182	0.04594292732728871
11228272	0.0578093395356	0.0		0.0	0.0	0.201680672269	0.0	0.0	0.11355852659907488	0.0	0.0	0.0567312356452	0.18327661643197599	0.03635847967971187
11228258	0.315863778567	0.0	0.0	0.0	0.0	0.505924170616	0.0	0.19661830984142986	0.16913978723088766	0.157346706837	0.0	0.23027539759820004	0.20593632443374346	0.062308971566019486
11228242	0.219294529582	0.0	0.0	0.0	0.0	0.420091324201	0.0	0.3201717479333095	0.2959685146651044	0.157346706837	0.0	0.23027539759820004	0.1938532022528794	0.056899165251977
11228236	0.0050400871593100005	0.0	0.0	0.0567312356452	0.0	0.161403070778	0.0	0.027277560105289245	0.023141165206641542	4.232163629496998	3.5171616822500003	5.533784986878201	0.1930332861426787	0.0901879111090058
11225546	0.0	0.0		0.00617026594409	0.0	0.0	0.0	0.0	0.0	0.0	0.0	0.023597098137495002	0.0	0.0
11225528	0.00910097758289	0.0		0.0	0.0	0.0	0.0	0.0	0.00041296570708878564	0.0	0.0	0.017426832193405	0.0	0.0
11225524	0.00967703400322	0.0		0.00408571663866	0.0	0.0	0.0	0.0	0.0025142086602480697	0.0	0.0	0.024222462929125	0.0	0.0
11225514	0.004075915845	0.0		0.0102559825827	0.0	0.0	0.0	0.0	0.0028668063547115045	0.000895794750249	0.0311027618991	0.370929402964465	0.0021347248576830237	0.012383100390795135
11230272	0.0255045341186	0.0		0.0269197118996	0.0	0.0	0.0	0.0	0.07141388544076754	0.003597131808419001	0.0	0.24281815240131	0.008049341417529067	0.0
11230268	0.023861158513099997	0.0		0.00844032888381	0.0	0.0	0.0	0.0	0.017473521956102654	0.003597131808419001	0.0	0.21589844050171	0.009094667217868429	0.0
11225462	1.11682123142e-05	0.0		0.0	0.0	0.0	0.0	0.0	0.0034739532947612984	0.0	0.0	0.009880763707765	0.0	0.0
11228052	0.163921311799	0.0	0.0	0.0	0.0	0.180853155101	0.0	0.09724023156283412	0.163921311799	0.0	0.0	0.0	0.22867121237299515	0.1695706113879204
11227536	0.00780429935337	0.0		0.008933064314989999	0.0	0.0	0.0	0.0	0.012788248938486627	0.0	0.0	0.086294894274067	0.0	0.0
11227596	0.068325137046	0.0	3.1115985621e-05	9.3347956863e-05	0.0	0.0	0.0	0.07275008143980978	0.068325137046	0.001026827525493	0.101287839774141	0.183685040920133	0.014205768402929659	0.1366516864758123
11227616	0.0	0.0		0.0	0.0	0.0	0.0	0.0	0.0	0.0010890594967349998	0.098767444938842	0.2050306070561	0.002432751789809743	0.015984620371108517
11230772	0.0052543018972	0.003550110477590001		0.0993090507109	0.0	0.0206381534284	0.0	0.0	0.010187268427013764	0.214078608314376	0.0	0.5387805709870341	0.0750316667909257	0.0
11230770	0.014995407201	4.7021330829e-05		0.108149060907	0.0	0.000221901697548	0.0	0.0	0.013874488456807024	0.003597131808419001	0.0	0.2074581116179	0.009402857491767377	0.0
11227604	0.00450012242091	0.0	0.0	0.0	0.0	0.000963722723205	0.0	0.00014511568412265829	0.00450012242091	0.001026827525493	0.10125672378852	0.18359169296327	0.002802456621549379	0.01871103135130981
11227598	1.89752456921e-05	0.00031115985621	0.00255151082092	0.006627704937270001	0.0	0.0409836065574	0.0	0.34681844467427003	0.016725435871773598	0.001026827525493	0.10125672378852	0.18359169296327	0.014705882352943673	0.13890134191157175
11227600	0.0	0.000715667669283	0.0987052129676	0.176963988026	0.0	0.0115	0.0	0.11353545537452253	0.002325577178899213	0.000715667669283	0.0987052129676	0.176963988026	0.0115	0.11353545537452255
11225582	0.0038434374177899995	0.0		0.00541982819414	0.0	0.0	0.0	0.0	0.0025002553421429536	0.0	0.0019142654055	0.11872888852664	0.0	0.0021033372499986588
11225572	0.00213905576059	0.0		0.011881931041	0.0	0.0	0.0	0.0	0.00213905576059	0.0	0.0019142654055	0.13061081956763998	0.0	0.0013977495329722685
11225586	0.00243053966842	0.0		0.07733677923169999	0.0	0.0	0.0	0.0	0.0024662722597762875	2.48831875069e-05	0.22385945359550005	0.4383610859945	0.00010951702989816984	0.03206463440128851
11225580	0.0	0.0	0.0019142654055	0.0359722811008	0.0	0.0	0.0	0.00824634173195935	0.0020023970496042764	0.0011695098128257002	0.23164789128516305	0.394444085384233	0.010221835580689688	0.13227059793426102
11225564	0.00032013831786900003	2.48831875069e-05	0.000348364625097	0.155010008137	0.0	0.00039904229848400016	0.0	0.006167413182328007	9.72680194689275e-05	0.09000746261154541	0.1232663294140577	2.1202288999342804	0.07256211594975183	0.08383857349666855
11225568	0.0	0.0		0.0779204530372	0.0	0.0	0.0	0.0	0.0	0.0004230141876177	0.006220796876729999	0.260303625231453	0.003300330033005029	0.049371562040367536
11227512	0.0	0.0		0.017915895005	0.0	0.0	0.0	0.0	0.0	0.0	0.0	0.131009982224	0.0	0.0
11228264	0.0692163777243	0.0	0.0	0.0	0.0	0.230055658627	0.0	0.01808549712061576	0.029117883951601857	0.157346706837	0.0	0.23027539759820004	0.19509851033186093	0.05072473145273597
11228344	0.0018820274060299999	0.0	0.0	0.0	0.0	0.12779552715700002	0.0	0.0009440997982430863	0.0008999516136157967	0.157346706837	0.0	0.23027539759820004	0.18111085432590288	0.04610558356365178
11230090	0.0	0.0		0.0	0.0	0.0	0.0	0.0	0.0	0.0	0.0	0.0	0.0611095197175839	0.0004514515219709134
11225484	0.0	0.0		0.0	0.0	0.0	0.0	0.0	0.0	0.000895794750249	0.0311027618991	0.360673420381765	0.001912249017314699	0.01109256374112234
11227476	0.0	0.0		0.000458600847196	0.0	0.0	0.0	0.0	0.0	2.48831875069e-05	0.22211921231777307	0.3669283689191961	0.0002645502645503145	0.07289824533325151
11225574	0.00260400052884	2.48831875069e-05	0.2219451881900001	0.325052025662	0.0	0.000601322910403	0.0	0.16512762449845278	0.0014669555824732116	0.0907539582367534	0.34677915841699075	2.296317532023461	0.07625535655420326	0.10464406433604616
11227680	0.005699398126729999	0.0		0.000597196500166	0.0	0.0	0.0	0.0	0.005699398126729999	0.0	0.0	0.000597196500166	0.0	0.0
11228782	0.017795688029	0.0		0.0	0.0	0.0	0.0	0.0	0.008295211720738641	0.0	0.0	0.0	0.0	0.0
11227726	0.0	0.0		0.0	0.0	0.0	0.0	0.0	0.0026118147294824545	0.0	0.0	0.0	0.022667729809750497	0.008569480776558936
11227690	0.0	0.0		0.0	0.0	0.0	0.0	0.0	0.00992315905591405	0.0	0.0	0.0	0.0	0.0
11227730	0.0	0.0	0.0	0.0	0.0	0.0339243095806	0.0	0.012825003705661591	0.0	0.0	0.0	0.0006718460626869999	0.05075840190345837	0.07111447967527346
11230170	0.00366919491753	0.0		0.06465432988990001	0.0	0.00244370745331	0.0	0.0	0.00366919491753	0.0	0.0	0.06613550181101001	0.0549379524302252	0.0
11228292	0.000244789626951	0.0		0.0	0.0	0.0	0.0	0.0	0.000244789626951	0.0	0.0	0.0	0.017214233231859558	0.0
11230296	0.016169682938399998	0.0		0.0409085578212	0.0	0.0	0.0	0.0	0.016169682938399998	0.003597131808419001	0.0	0.25680699832291	0.007836352534101677	0.0
11230292	0.00345188081029	0.0		0.129990469077	0.0	0.00390516039052	0.0	0.0	0.00345188081029	0.25612037054971604	0.0	0.567078003050662	0.05812678218911015	0.0
11228186	5.27651623202e-05	0.0	0.0	0.0	0.0	0.0096725440806	0.0	0.0012938259949753824	5.27651623202e-05	0.0	0.0	0.0	0.05848214285719865	0.04431504326133755
11225390	0.0	0.0		0.0	0.0	0.0	0.0	0.0	0.0	2.48831875069e-05	0.103784451396	0.16542737843900002	0.00011676786548327884	0.02190929130676198
11225396	0.000654410442527	0.0		0.0	0.0	0.0	0.0	0.0	0.000654410442527	0.040438495298106905	0.15381624437779998	0.7560160136399999	0.007441220610301696	0.019644538212063127
11230258	0.10454656425100001	0.0		0.00978043681243	0.0	0.0	0.0	0.0	0.10454656425100001	0.0	0.0	0.04514047759584	0.0	0.0
11230260	0.305898794637	0.0		0.0029153225114	0.0	0.0	0.0	0.0	0.305898794637	0.0	0.0	0.03827536329481	0.0	0.0
11228310	0.00578416595509	0.0		0.0	0.0	0.06259541984730001	0.0	0.0	0.001768161725169136	0.0	0.0	0.0	0.02805459272099164	0.0
11230768	0.0023742024759	0.000376170646632		0.119810350952	0.0	0.00175785541639	0.0	0.0	0.0023742024759	0.0034090464851055	0.0	0.362322864703	0.006985595220884573	0.0
11230214	0.0	0.00296234384223		0.16798370438700005	0.0	0.0169742691634	0.0	0.0	0.00023750261596993104	0.024944816004790003	0.0	0.542245246352	0.05084339658805823	0.0
11230212	0.0008609469828910001	7.05319962435e-05		0.074528809364	0.0	0.0007088846880910001	0.0	0.0	0.0004601575690319162	0.0030328758384735	0.0	0.24251251375100005	0.011068211068204143	0.0
11227796	0.000641365692762	0.0		0.0	0.0	0.0	0.0	0.0	0.000641365692762	0.0	0.0	0.0	0.0	0.0
11228806	0.000731960054411	0.0		0.0	0.0	0.0	0.0	0.0	0.0007267886725343455	0.0	0.0	0.0	0.04381538461536432	0.002752634246701045
11227846	0.00235873146142	0.0		0.0	0.0	0.00833129135016	0.0	0.0	0.001433296850523796	0.0	0.0	0.0	0.06553152323973034	0.004116917304085779
11228812	0.00029100015259500003	0.0	0.0	0.0	0.0	0.0999410377358	0.0	0.0065935003698248795	0.0009564143398315527	0.0009971979307010002	0.429402732647	0.582846564233	0.14635412397907033	0.11191780007138293
11225404	0.00581400169958	0.0		0.0	0.0	0.0	0.0	0.0	0.005436661254355395	0.0	0.0	0.0	0.0	0.0
11228338	0.07145323685039999	0.0		0.0	0.0	0.448512585812	0.0	0.0	0.0168057397759014	0.0	0.0	0.0567312356452	0.1907822542720912	0.035172939034880384
11225488	0.0018064926359700002	0.0		0.0	0.0	0.0	0.0	0.0	0.0018064926359700002	0.04270286536124202	0.2412507837816	0.936868029754	0.019482326746469443	0.03419212404088834
11225590	0.0	0.0	0.000174024127773	0.04141774241000002	0.0	0.0	0.0	0.0007355530013682834	0.0	0.0011695098128257002	0.2299076500074361	0.39988954669343296	0.012761335867502357	0.16045435784503326
11227550	0.000416053101379	0.0		0.0763665024588	0.0	0.0	0.0	0.0	0.005596399936979832	9.95327500277e-05	0.0	0.0902264379002	0.0008444162972348997	0.0
11225388	0.0	0.0		0.0	0.0	0.0	0.0	0.0	0.0	0.0	0.0	0.0	0.0	0.0
11225532	0.00550121712371	0.0		0.0	0.0	0.0	0.0	0.0	0.00550121712371	0.0	0.0	0.009880763707765	0.0	0.0
11228220	0.0046745221363400005	0.0	0.0	0.0	0.0	0.0534506952417	0.0	0.0011939226872597008	0.005143846090644529	4.232163629496998	3.5171616822500003	5.477053751233	0.16488832625038968	0.10362487452954604
11227886	0.000658364747543	0.0		0.0565286576966	0.0	0.0006185248183080001	0.0	0.0	0.001142362748663786	0.0	0.0	0.0565286576966	0.0006185248183080001	0.0
11228032	0.0	0.0		0.049672921923000005	0.0	0.0	0.0	0.0	0.0	0.0	0.0	0.2241825597958	0.0	0.0
11225392	0.00494593550059	0.0		0.0	0.0	0.0	0.0	0.0	0.00494593550059	0.0	0.0	0.0	0.0	0.0
11225418	0.0	0.0		0.0	0.0	0.0	0.0	0.0	0.0	2.48831875069e-05	0.103784451396	0.16542737843900002	0.00010913456291594456	0.020477045809353882
11225394	0.0013129381406299999	0.0		0.0	0.0	0.0	0.0	0.0	0.00042634153644073797	0.040438495298106905	0.15381624437779998	0.7560160136399999	0.014342533445817127	0.037863740519141084
11225400	0.0	0.0		0.0	0.0	0.0	0.0	0.0	0.0006537640757597982	0.040438495298106905	0.15381624437779998	0.7560160136399999	0.01727391493684783	0.04560247569855037
11225414	0.00247926770356	0.0		0.0	0.0	0.0	0.0	0.0	0.0007924216375914939	0.040438495298106905	0.15381624437779998	0.7560160136399999	0.01729651162789894	0.04566213009990022
11225434	0.005341716546649999	2.48831875069e-05	0.103784451396	0.16542737843900002	0.0	0.00028818443804000003	0.0	0.05407238350176069	0.0016924546332561642	0.04153335554840689	0.157001292378685	2.3548636022980003	0.03415344771771204	0.04951744011537704
11230192	0.0202720636357	0.0		0.007429370270979998	0.0	0.0	0.0	0.0	0.0202720636357	0.0	0.0	0.04920782271258	0.0005149330587023289	0.0
11230154	0.0005867600153430001	0.0		0.0417784524416	0.0	0.0007461891056389999	0.0	0.0	0.0010631481789491778	0.0	0.0	0.0417784524416	0.05921478603807818	0.0
11225432	0.0	0.0		0.0	0.0	0.0	0.0	0.0	0.0	0.0	0.0	0.0	0.0	0.0
11225446	0.0	0.0		0.0	0.0	0.0	0.0	0.0	0.035264560119309014	0.0	0.0	0.003085132972045	0.0	0.0
11228020	0.0	0.0		0.051231043689800006	0.0	0.0	0.0	0.0	0.0	0.0	0.0	0.2257406815626	0.0	0.0
11228038	0.0	0.0		0.140604908229	0.0	0.0	0.0	0.0	0.0008223240895552362	0.0	0.0	0.17027154666731995	0.006846709775581036	0.002828364748712797
11228036	0.0036753804343099996	0.0		0.0339047296438	0.0	0.0	0.0	0.0	0.0014861733330591052	0.0	0.0	0.17687798295822	0.0	0.0
11228066	0.000407118826747	0.0		0.289499024257	0.0	0.0	0.0	0.0	0.000407118826747	0.0	0.0	0.34852067678037	0.004432561739253422	0.001831084094510716
11225468	0.00021299718285299997	0.0		0.0	0.0	0.0	0.0	0.0	0.00021299718285299997	0.000895794750249	0.0311027618991	0.360673420381765	0.0012906463987368347	0.007486774638452986
11228098	0.000250833458913	0.0		0.0	0.0	0.00127424607107	0.0	0.0	0.000250833458913	0.0	0.0	0.05902165252337	0.005630630630630014	0.0021709374570637974
11228048	0.0	0.0		0.00710503525625	0.0	0.0	0.0	0.0	0.0004008174322163683	0.0	0.0	0.05902165252337	0.0074498906166864404	0.00307753777984755
11225458	0.00954206599316	0.0		0.0	0.0	0.0	0.0	0.0	0.03403713820042638	0.0	0.0	0.009880763707765	0.0	0.0
11225460	0.189314391885	0.0		0.0	0.0	0.0	0.0	0.0	0.003739258798708317	0.0	0.0	0.009880763707765	0.0	0.0
11225470	0.00878014863943	0.0		0.0	0.0	0.0	0.0	0.0	0.005994057679859302	0.000895794750249	0.0311027618991	0.360673420381765	0.0018558614290115746	0.010765470924341124
11225472	0.0	0.0		0.0	0.0	0.0	0.0	0.0	0.005990104467869288	0.000895794750249	0.0311027618991	0.360673420381765	0.0019473143289861267	0.01129597041111966
11225482	0.0	0.0		0.0	0.0	0.0	0.0	0.0	0.00020607685488862118	0.000895794750249	0.0311027618991	0.360673420381765	0.0019477357571804645	0.011298415029506528
11225494	0.0027176177447199995	0.0		0.0	0.0	0.0	0.0	0.0	0.0006689137598156037	0.000895794750249	0.0311027618991	0.360673420381765	0.0019816150162363915	0.011494941651916616
11225498	0.010759454562999999	0.0		0.000500291833305	0.0	0.0	0.0	0.0	0.002407236643060948	0.000895794750249	0.0311027618991	0.360673420381765	0.0023796932839745192	0.013804111911050314
11225504	0.00972455836389	0.0		0.00258484113874	0.0	0.0	0.0	0.0	0.004253595896841144	0.000895794750249	0.0311027618991	0.36017312854846	0.002391867649987809	0.013874732907472535
11225496	0.00348156567037	0.0		0.0	0.0	0.0	0.0	0.0	0.00348156567037	0.0	0.0	0.009880763707765	0.0	0.0
11225438	0.037390697839599994	0.0		0.0	0.0	0.0	0.0	0.0	0.037390697839599994	0.0	0.0	0.0	0.0	0.0
11232080	0.0	0.0		0.0	0.0	0.0	0.0	0.0	0.0	2.48831875069e-05	0.22211921231777307	0.366469768072	0.00033311125916062257	0.09179059538963713
11225420	0.0	0.0		0.0	0.0	0.0	0.0	0.0	0.0	0.0	0.0	0.0	0.0	0.0
11228042	0.000402853565719	0.0		0.0222499788288	0.0	0.0	0.0	0.0	0.000400998872995852	0.0	0.0	0.051916617267120005	0.00753048051637687	0.003110829337231748
11228016	0.00043711538585800003	0.0	0.0	0.0272982933529	0.0	0.00859540214203	0.0	0.0035507467406072453	0.0003663100348565478	0.0	0.0	0.0272982933529	0.00859540214203	0.0035507467406072453
11228040	0.00035901951579400004	0.0		0.00236834508542	0.0	0.0	0.0	0.0	8.908363519568003e-05	0.0	0.0	0.02966663843832	0.008083140877599294	0.0033391324397332315
11227544	0.00949428623924	0.0		0.00151787443792	0.0	0.0	0.0	0.0	0.00949428623924	0.0	0.0	0.07788437689672	0.0	0.0
11225518	0.0	0.0		0.00679563073572	0.0	0.0	0.0	0.0	0.002504245065665921	0.000895794750249	0.0311027618991	0.35758828740972	0.002613050736732709	0.015157770558929312
11225536	0.0055104903889	0.000895794750249	0.0311027618991	0.350792656674	0.0	0.00307455803228	0.0	0.017834879578987887	0.004216594691127311	0.0300340073208775	0.16767164173514848	1.8395164707295488	0.042725663716801324	0.04233125228973917
11225588	0.017162889527	0.0		0.0135495704853	0.0	0.0	0.0	0.0	0.011780528364196465	0.0023763862082	0.0005419828194140001	0.35170515881305003	0.006424527701828562	0.013293101501068579
11225578	0.0	0.0		0.00296006001372	0.0	0.0	0.0	0.0	0.0	0.0	0.0	0.03706328665067	0.0	0.0
11227480	0.018699321544000003	0.0		0.00500291833305	0.0	0.0	0.0	0.0	0.012460098487490736	0.0023763862082	0.0005419828194140001	0.33815558832774995	0.008157660932109428	0.01687915747502618
11227488	0.00534444521254	0.0		0.0155507378186	0.0	0.0	0.0	0.0	0.011373031344057377	0.0023763862082	0.0005419828194140001	0.3331526699947001	0.008522487553830633	0.0176340265545776
11227504	0.000581372062856	0.0		0.016134411624100002	0.0	0.0	0.0	0.0	0.007974503943330886	0.0023763862082	0.0005419828194140001	0.3176019321761	0.009284794999121793	0.01921133008809516
11227566	4.88702091525e-05	0.0023763862082	0.0005419828194140001	0.301467520552	0.0	0.010045752934200002	0.0	0.02078584132666592	0.0012530565194993225	0.3047157718482	0.4768410758385141	4.173368474372	0.0769954213587418	0.08278797981764477
11227568	0.0013132776300799993	0.117768584983	0.409487734563	2.00976177855	0.0	0.111367127496	0.0	0.13184052430494486	0.00030898372819936434	0.30233938564	0.4762990930191	3.87190095382	0.09917300912653668	0.1033266605987822
11229270	0.0030015293583600003	0.0		0.0	0.0	0.0	0.0	0.0	0.0030015293583600003	0.0	0.0	0.0	0.0	0.0
11227948	0.0005761791865809999	0.0	0.0	0.0	0.0	0.0379798599397	0.0	0.0050801063335954464	0.000509924084041346	0.0	0.0	0.0	0.04491989454473277	0.011378942536103696
11227942	0.0	0.0	0.0	0.0	0.0	0.015383048084799997	0.0	0.0001268890974076683	0.0	0.0	0.0	0.0	0.02686386960462549	0.009277311057227957
11228818	0.00313897482495	0.0	0.0	0.0	0.0	0.159678284182	0.0	0.15987174375855787	0.00313897482495	0.0009971979307010002	0.429402732647	0.582846564233	0.160162868920948	0.14397491556887568
11228804	0.00133570965627	0.0		0.0	0.0	0.00393468424159	0.0	0.0	0.00133570965627	0.0	0.0	0.0	0.029562686681461125	0.0017128860576277856
11227844	0.0	0.0		0.0	0.0	0.0	0.0	0.0	0.0	0.0	0.0	0.0	0.09884822860470437	0.006521403485769352
11227840	0.000246951275962	0.0	0.0	0.0	0.0	0.08552754435110001	0.0	0.009604760392714821	0.000246951275962	0.0	0.0	0.0	0.18187969416054736	0.0876888957600777
11229264	0.000427782334956	0.0		0.0	0.0	0.0	0.0	0.0	0.000427782334956	0.0	0.0	0.05392400308119999	0.0	0.0
11227644	0.0	0.0		0.0	0.0	0.0	0.0	0.0	0.00040468258832235726	0.0	0.0	0.05392400308119999	0.0	0.0
11227648	0.0	0.0		0.0	0.0	0.0	0.0	0.0	0.00018755986845135227	0.0	0.0	0.05392400308119999	0.0	0.0
11227660	0.0	0.0		0.0	0.0	0.0	0.0	0.0	0.0002026209946297137	0.0	0.0	0.05392400308119999	0.0	0.0
11227666	0.0	0.0		0.0	0.0	0.0	0.0	0.0	0.00329353951517708	0.0	0.0	0.05392400308119999	0.0	0.0
11227682	0.0	0.0		0.05392400308119999	0.0	0.0	0.0	0.0	0.0	0.0	0.0	0.1010647212971	0.02403182593163691	0.0
11227688	0.024570820632099998	0.0		0.0240837728707	0.0	0.0	0.0	0.0	0.002903877912801633	0.0	0.0	0.0471407182159	0.059497487437180266	0.0
11227686	0.00180557574509	0.0		0.023056945345200003	0.0	0.0741668754698	0.0	0.0	0.0006893076871892235	0.0	0.0	0.023056945345200003	0.0741668754698	0.0
11229278	0.011040806267600001	0.0		0.0	0.0	0.00031555695803099995	0.0	0.0	0.011040806267600001	0.0	0.0	0.0	7.675775253302417e-05	0.0
11229276	0.0	0.0		0.0	0.0	0.0	0.0	0.0	0.008959470997437676	0.0	0.0	0.0	0.0	0.0
11227750	0.00814804602681	0.0		0.0	0.0	0.0	0.0	0.0	0.00814804602681	0.0	0.0	0.0	0.035377191114857175	0.0033235048681215127
11227762	0.00037263227021499997	0.0		0.0	0.0	0.0	0.0	0.0	0.004233390432464469	0.0	0.0	0.0	0.03717236493788095	0.003492152201386991
11227768	0.0007004376117310001	0.0		0.0	0.0	0.0	0.0	0.0	0.0030832682420534503	0.0	0.0	0.0	0.03918871113552553	0.0036815775399316256
11227776	0.0	0.0		0.0	0.0	0.0	0.0	0.0	0.0	0.0	0.0	0.0	0.04218677273299645	0.003963229983218401
11228792	0.0008471940500710001	0.0		0.0	0.0	0.00607684578209	0.0	0.0	0.0008471940500710001	0.0	0.0	0.0	0.06509844373672274	0.01618946410152601
11228794	4.56885921896e-07	0.0		0.0	0.0	0.006495849873689999	0.0	0.0	4.56885921896e-07	0.0	0.0	0.0	0.08841539615082168	0.02255539121917804
11227794	0.0	0.0		0.0	0.0	0.211958946899	0.0	0.0	3.598723392762412e-07	0.0	0.0	0.0	0.11715551804159167	0.0304685782715109
11229272	0.0	0.0		0.0	0.0	0.0	0.0	0.0	0.004033709743578936	0.0	0.0	0.0	0.0	0.0
11227764	0.0	0.0		0.0	0.0	0.0	0.0	0.0	0.0014107939305783455	0.428676205687	0.0	4.150443711866	0.02541717316831032	0.0
11227774	0.000495688117948	0.0231023104861		0.705186895677	0.0	0.00246710526316	0.0	0.0	0.00026741648244222184	0.4517576829528001	0.0	6.377070661996	0.08627397909127603	0.0
11228848	0.0014126708089700001	0.08727539516989999		2.57447056466	0.0	0.0445929360425	0.0	0.0	0.0017187699473700873	0.11035687243569996	0.0	4.80109751479	0.09641774373705192	0.0
11227782	0.06866580795	0.0230814772658		2.22662695013	0.0	0.117846067099	0.0	0.0	0.041888804760667836	0.0230814772658	0.0	2.22662695013	0.10880453679930163	0.04066686376762786
11227780	0.009693118931459998	0.318298500031		0.8707862515289999	0.0	0.14744351962000002	0.0	0.0	0.0022187977891807	0.4286553724667	0.0	5.671883766319	0.09807402832995628	0.0
11227832	0.0	0.0		0.0	0.0	0.0088809946714	0.0	0.0	0.0018308135830305333	0.0	0.0	0.0	0.0004935346954889154	0.0
11229286	0.0019355431143499998	0.0		0.0	0.0	0.0	0.0	0.0	0.00193554311435	0.0	0.0	0.0	0.00031121623303860334	0.0
11228788	0.006451414443680001	0.0		0.0	0.0	0.0	0.0	0.0	0.006451414443680001	0.0	0.0	0.0	0.011423747889690352	0.004233622495070957
11228786	0.000843186569969	0.0		0.0	0.0	0.0	0.0	0.0	0.000843186569969	0.0	0.0	0.0	0.011524269088833243	0.004270875488924832
11227738	0.0	0.0		0.0	0.0	0.000538793103448	0.0	0.0	0.0024279516723526885	0.0	0.0	0.0	0.015274642588397109	0.005660757843296531
11228784	0.0008677407547989999	0.0		0.0	0.0	0.0	0.0	0.0	0.0008677407547989999	0.0	0.0	0.0	0.0	0.0
11227674	0.00567935467039	0.0		0.0007464956252080001	0.0	0.0	0.0	0.0	0.00567935467039	0.0	0.0	0.0007464956252080001	0.0	0.0
11227676	0.030616976767599998	0.0		0.0	0.0	0.0	0.0	0.0	0.011587920184711529	0.0	0.0	0.0	0.0	0.0
11227664	0.0	0.0		0.0748237448333	0.0	0.0	0.0	0.0	0.0	0.0	0.0	0.08838508202460699	0.00753338659968878	0.0039018615059436593
11227826	0.0	0.0		0.0	0.0	0.0	0.0	0.0	0.0	0.0	0.0	0.0	0.0	0.0
11227824	0.0	0.0		0.0	0.0	0.0	0.0	0.0	0.004436362153775257	0.0	0.0	0.0	0.0	0.0
11227820	0.0	0.0		0.0	0.0	0.0	0.0	0.0	0.0	0.0	0.0	0.0	0.00021649707728945368	0.0
11228798	0.0	0.0		0.0	0.0	0.0	0.0	0.0	0.0	0.0	0.0	0.0	0.00027500229168576045	0.0
11227804	0.0	0.0		0.0	0.0	0.0	0.0	0.0	0.0	0.0	0.0	1.23539163343	0.05736788370851379	0.025193044817103643
11227802	0.0	0.0		0.0	0.0	0.0006723442402509997	0.0	0.0	0.0	0.0	0.0	1.23539163343	0.07081982955229985	0.031100452457268325
11227800	0.007991002661979999	0.0	0.0	1.23539163343	0.0	0.0964754098361	0.0	0.042475060560902035	0.005851052243197455	0.0	0.0	1.23539163343	0.09787204223201904	0.06689383090353411
11230774	0.00742033866883	0.00025861731956		0.122467056144	0.0	0.00124714196633	0.0	0.0	0.00742033866883	0.001810321236916	0.0	0.15249017587836206	0.033073157825088795	0.0
11228778	0.000950334117986	0.0		0.103091045841	0.0	0.0	0.0	0.0	0.000950334117986	0.0	0.0	0.116652383032307	0.005272407732854561	0.002730804334044767
11227650	0.0	0.0		0.0110232520656	0.0	0.0	0.0	0.0	0.0008362625558105282	0.00644474556429	0.00731565712704	0.022868417398087	0.1925445705025013	0.10565352711442297
11227636	0.00769001797092	0.0		0.103414527279	0.0	0.0	0.0	0.0	0.00769001797092	0.00644474556429	0.00731565712704	0.11525969261148701	0.13695050722415072	0.07514781689547992
11227634	0.0	0.0		0.000995327500277	0.0	0.0	0.0	0.0	0.007538366014221495	0.00644474556429	0.00731565712704	0.011845165332487	0.2162621359224089	0.11866788755388165
11227630	0.00156296279836	0.0		0.0311039843837	0.0	0.0	0.0	0.0	0.00156296279836	0.0	0.0	0.11608006971983001	0.006607929515405826	0.0034225278988358424
11227632	0.0	0.0		0.0834333277107	0.0	0.0	0.0	0.0	0.0006010996082699701	0.00644474556429	0.00731565712704	0.09428316554291001	0.15037974683549785	0.08251674206278352
11227658	0.0	0.0	0.0	0.0015427576254300002	0.0	0.0166414523449	0.0	0.0086193163523884	0.004154037328189975	0.029735409070790007	0.03508529438474	0.5304356761642101	0.13385702567995436	0.111604245153464
11227612	0.00353760961616	0.0		0.14972213922900002	0.0	0.0	0.0	0.0	0.003537609616159999	0.002264370063135	0.00039813100011100016	0.3354751339678401	0.006188371302279933	0.0009919568815322168
11230294	0.00184039336776	0.00136361859404		0.0279776918433	0.0	0.0720930232558	0.0	0.0	0.0058198058853182215	0.25748398914375603	0.0	0.465065225816962	0.1007998458128917	0.0
11230284	0.0	0.0		0.000846383954922	0.0	0.124174372523	0.0	0.0	0.0013970816659927814	0.263197080839482	0.0	0.46558246045606105	0.14358340203360714	0.0
11230286	0.0	0.0		0.0007053199624349999	0.0	0.0488322717622	0.0	0.0	0.0016407100514239114	0.25612037054971604	0.0	0.437087533973662	0.11787305978183972	0.0
11230270	0.0	0.000188085323316		0.0004937239737049999	0.0	0.231155778894	0.0	0.0	0.0012959101770799127	0.263197080839482	0.0	0.4647360765011391	0.1458365281399604	0.0
11230256	0.0	0.0541262442584		0.0812716537166	0.0	0.278195488722	0.0	0.0	8.339515355257679e-05	0.264654742095186	0.0	0.5207431739927341	0.14694716861766846	0.0
11230250	0.0	0.201806040968		0.353770452366	0.0	0.104875406284	0.0	0.0	0.003230211475198497	0.2174406334686461	0.0	0.5504590909186341	0.13528788413996795	0.0
11230222	0.0	0.0004467026428759999		0.000540745304534	0.0	0.826086956522	0.0	0.0	0.0	0.015634592500646003	0.0	0.19668863855263397	0.17148014440435475	0.0
11230218	0.0	0.006630007646890001		0.0286595011403	0.0	0.231337161608	0.0	0.0	0.0	0.02219406815129	0.0	0.3299078895816	0.12364112639163195	0.0
11230184	0.0	0.00164574657902		0.056500821465300013	0.0	0.35175879397	0.0	0.0	0.0	0.02362821874158	0.0	0.4307623634303	0.07365875109936318	0.0
11230230	0.0	0.0		0.00378521713174	0.0	0.0	0.0	0.0	0.0	4.7021330829e-05	0.0	0.10474001442166	0.00013958682300395305	0.0
11227592	0.0	0.0		0.110356936593	0.0	0.0	0.0	0.0	0.0	0.19385222959708887	0.07348005270796101	3.37996265066404	0.07753684408148738	0.0759066825267616
11227582	0.0	0.0		0.0149547956917	0.0	0.0	0.0	0.0	0.0	0.0	0.0	0.08664325889919999	0.0	0.0
11227576	0.00246129637104	0.0		0.117423761845	0.0	0.0	0.0	0.0	0.00246129637104	0.0	0.0	0.1891122250525	0.0	0.0
11227584	0.000142232572533	0.0		0.0716884632075	0.0	0.0	0.0	0.0	0.0014260989307700149	0.19385222959708887	0.07348005270796101	3.3412941772785403	0.08015137547912134	0.07846624510771832
11227590	0.0	0.00017418231254900002		0.013163206191200002	0.0	0.0127504553734	0.0	0.0	0.0	0.19385222959708887	0.07348005270796101	3.26960571407104	0.08876232436935066	0.08689615441609662
11227606	0.0	0.0		0.097044431277	0.0	0.0	0.0	0.0	0.0	0.002264370063135	0.00039813100011100016	0.28279742601584	0.007449246889327636	0.001194067284129932
11227608	0.0	0.000199065500055		0.177367360549	0.0	0.0010710938546	0.0	0.0	0.0	0.19387711278459496	0.07348005270796101	3.43380986842884	0.07487030786308929	0.07327403112227
11227586	0.0	0.00206530456308	0.00039813100011100016	0.008385634189839999	0.0	0.246290801187	0.0	0.04328405324311943	0.0	0.19367804728454002	0.07348005270796101	3.25644250787984	0.08990020177783561	0.08819696667476591
11227510	0.0007113146954860003	0.00758937218961	0.006693577439359999	0.0965218843394	0.0	0.056262682162	0.0	0.04956469041318642	0.001080134239407574	0.28334909570661	0.94092214694836	7.427634292509401	0.10268266725387536	0.09703890922211723
11230246	0.0	0.0		0.108007996914	0.0	0.0	0.0	0.0	0.0	0.0007758519586789999	0.0	0.18641606607136	0.02646779264460088	0.0
11228300	0.0	0.0		0.0	0.0	0.0395084772126	0.0	0.0	0.0	0.157346706837	0.0	0.173544161953	0.10727969348664934	0.03541935897880639
11230766	0.0	0.00108149060907		0.246133156224	0.0	0.00319014355646	0.0	0.0	0.0	0.00108149060907	0.0	0.2462036882202435	0.015500283227775288	0.0
11230068	0.0	0.0		0.00463160108666	0.0	0.0770261219022	0.0	0.0	0.0	0.0	0.0	0.00463160108666	0.2289911851125911	0.03250653349777998
11230232	0.0102327379176	0.0		0.0152114005232	0.0	0.0	0.0	0.0	0.0102327379176	2.35106654145e-05	0.0	0.116048644486	6.161429451629866e-05	0.0
11230194	0.00568989466687	0.000329149315803		0.0594114515025	0.0	0.00256081946223	0.0	0.0	0.00568989466687	0.0007053199624349999	0.0	0.12977887308810002	0.009694431518550234	0.0
11230254	0.008451773809109999	0.0		0.0454931375771	0.0	0.0	0.0	0.0	0.008451773809109999	0.003597131808419001	0.0	0.252951249195	0.007543842461064275	0.0
11230206	0.0170423530685	0.0		0.0009874479474089998	0.0	0.0	0.0	0.0	0.0170423530685	2.35106654145e-05	0.0	0.07267146679618901	8.261049153238556e-05	0.0
11227500	0.00154597085348	0.0		0.057679228641099985	0.0	0.0	0.0	0.0	0.00154597085348	0.00758937218961	0.006693577439359999	0.1542011129805	0.031401214866694324	0.027662945200235104
11225594	0.005926278071859999	0.0	0.00248831875069	0.0625065670174	0.0	0.0	0.0	0.02196270288693896	0.00606057365942935	0.0671895796676778	0.25775900068415303	0.9392766070938332	0.04997733454216395	0.14632796573993068
11227478	0.0	0.0		0.0121181123159	0.0	0.0	0.0	0.0	0.006378515624828494	0.0	0.00248831875069	0.0746246793333	0.0	0.01887103924286526
11225596	0.0104201420971	0.0		0.0221211536937	0.0	0.0	0.0	0.0	0.0104201420971	0.0	0.00248831875069	0.096745833027	0.0	0.015440701187938038
11225576	0.006526103316000001	0.0	0.00166717356296	0.0879869510245	0.0	0.0	0.0	0.010381759979665377	0.006526103316000001	0.0895844484239277	0.1219972868511977	2.0490752336956275	0.059286440603015016	0.06696555700189513
11225566	0.006901543417430001	0.00039813100011100016	0.00243855237568	0.106251210655	0.0	0.00219268192408	0.0	0.013639445400928173	0.006901543417430001	0.0294368108207118	0.1389078994617008	1.5948754919605208	0.04963497524543434	0.04542067237078691
11225540	0.00470800093766	2.48831875069e-05	0.0061212641267	0.0944565797763	0.0	0.000149992500375	0.0	0.037081661212771316	0.00470800093766	0.048625063987887705	0.2548618873479908	1.5598685433308208	0.03059482346515715	0.05811378834528015
11225512	0.00828937374638	0.0	0.0014183416879	0.033741602259400004	0.0	0.0	0.0	0.027799244573921	0.00828937374638	0.048525531237860006	0.25008431534667	1.4990789162513998	0.0438475212325001	0.0652368695439505
11227654	0.0	0.0		0.0	0.0	0.0	0.0	0.0	0.003352915813220097	0.0	0.0	0.05392400308119999	0.0	0.0
11225506	0.014353658509500001	0.0		0.0	0.0	0.0	0.0	0.0	0.014353658509500001	0.000895794750249	0.0311027618991	0.360673420381765	0.0017566974088696885	0.01019024081346651
11227668	0.0	0.0		0.0	0.0	0.0	0.0	0.0	0.0	0.0	0.0	0.05392400308119999	0.0	0.0
11227640	0.0	0.0		0.0	0.0	0.0	0.0	0.0	0.0	0.0	0.0	0.05392400308119999	0.0	0.0
11227638	0.00353700735513	0.0		0.0	0.0	0.0	0.0	0.0	0.00353700735513	0.0	0.0	0.05392400308119999	0.0	0.0
11227520	0.0	0.0		0.028764964758	0.0	0.0	0.0	0.0	0.0	0.0	0.0	0.113094087219	0.0	0.0
11227494	0.0	0.0		0.0007504377499570001	0.0	0.0	0.0	0.0	0.006906554740124218	0.0023763862082	0.0005419828194140001	0.30676227578780696	0.00973587815697386	0.020144674059986423
11227772	0.0	0.0		0.0	0.0	0.0	0.0	0.0	0.0	0.428676205687	0.0	4.150443711866	0.030798071772903068	0.0
11230210	0.0151218842273	0.0		0.000611277300777	0.0	0.0	0.0	0.0	0.0151218842273	2.35106654145e-05	0.0	0.07229529614955699	8.691873098648651e-05	0.0
11230084	0.0	0.0		7.05319962435e-05	0.0	0.151969981238	0.0	0.0	0.0	0.0	0.0	7.05319962435e-05	0.16581371545552148	0.0
11230148	0.00142267350792	0.000376170646632		0.0703674215856	0.0	0.0149454692339	0.0	0.0	0.003231956746323882	0.000376170646632	0.0	0.0704379535818435	0.04085401038665255	0.0
11230134	0.0	0.00025861731956		0.000846383954922	0.0	0.305555555556	0.0	0.0	0.0	0.02706077589213	0.0	0.5678232620172721	0.04955612546854584	0.0
11230208	0.0	9.4042661658e-05		0.0634082646229	0.0	0.00108518719479	0.0	0.0	0.0	0.0031269185001315	0.0	0.3059207783739001	0.008669578254345561	0.0
11230242	0.0	0.000164574657902		0.172756369466	0.0	0.000899396119748	0.0	0.0	0.0	0.015799167158548	0.0	0.369445008018634	0.05762799073836605	0.0
11228226	0.366823592591	0.0		0.0	0.0	0.327868852459	0.0	0.0	0.005239987830084589	0.157346706837	0.0	0.173544161953	0.1414560242405991	0.053811103310995784
11230144	0.0	0.0		0.04422356164469999	0.0	0.0	0.0	0.0	0.0	0.00094042661658	0.0	0.1996760813657001	0.003846893633391157	0.0
11227786	0.0	0.0		0.00256692338735	0.0	0.0	0.0	0.0	0.00012321816467936587	0.8367961910546999	0.0	8.716254903716349	0.07743045597937663	0.0
11229280	0.00048396065309599994	0.0		0.0	0.0	0.0	0.0	0.0	0.00048396065309599994	0.0	0.0	0.00256692338735	0.0	0.0
11229262	0.0	0.0		0.0	0.0	0.0	0.0	0.0	0.0	0.0	0.0	0.05392400308119999	0.0	0.0
11227784	0.058467827985	0.408140818588		3.0418042140099995	0.0	0.0650572831424	0.0	0.0	0.0159463644230934	0.8367961910546999	0.0	8.713687980328999	0.0952280181991628	0.0
11227618	0.0	0.00015557992810499998		0.0155891087961	0.0	0.00189035916824	0.0	0.0	0.0	0.0010890594967349998	0.098767444938842	0.2050306070561	0.0053738676493156395	0.03530949382452606
11227642	0.0	0.0		0.0	0.0	0.0	0.0	0.0	0.0	0.0	0.0	0.05392400308119999	0.0	0.0
11229266	0.0006151467451340001	0.0		0.0	0.0	0.0	0.0	0.0	0.0006151467451340001	0.0	0.0	0.05392400308119999	0.0	0.0
11227492	0.00708694982662	0.0		0.0211790209432	0.0	0.0	0.0	0.0	0.00708694982662	0.0023763862082	0.0005419828194140001	0.32794129673100697	0.008068381530631637	0.016694427919659617
11230150	0.0	0.00115202260531		0.0741291280519	0.0	0.0110484780158	0.0	0.0	0.0	0.03110461034342	0.0	0.5425869330791501	0.05200979174799104	0.0
11230168	0.0	0.000117553327073		0.106456292997	0.0	0.000957487552662	0.0	0.0	0.0	0.027178329219203	0.0	0.6742795550142721	0.04125363954592519	0.0
11230158	0.0	0.0		0.0443176043063	0.0	0.0	0.0	0.0	0.0	0.02706077589213	0.0	0.6121408663235721	0.044626043702266624	0.0
11230202	8.70470454498e-05	0.0		0.00905160618458	0.0	0.0	0.0	0.0	0.011213016039942231	2.35106654145e-05	0.0	0.07168401884878	9.093389106115552e-05	0.0
11230152	0.0	0.0		0.057695172927199986	0.0	0.0	0.0	0.0	0.0	0.00094042661658	0.0	0.2131476926482	0.003630093474907093	0.0
11227934	0.818808331853	0.0	0.0	0.0	0.0	1.0	0.0	0.9995314113252975	0.002553884524342791	0.0	0.0	0.0	0.16022022440599415	0.1638466460159812
11228230	0.14537591396500002	0.0		0.0	0.0	0.192771084337	0.0	0.0	0.001852917822342599	0.157346706837	0.0	0.173544161953	0.14179340937906562	0.053457307242015056
11230074	1.9946515052e-05	2.35106654145e-05		0.0602578354574	0.0	0.00034758428919	0.0	0.0	1.9946515052e-05	0.4806198807946146	0.000329149315803	3.7129042326394	0.09194383860412507	0.008978245112585872
11230120	0.0	0.00094042661658		0.15545251972100002	0.0	0.00565530892125	0.0	0.0	0.0	0.02619088127179	0.0	0.6004451165065	0.04103976136626203	0.0
11225520	0.0016136244570899999	0.0		0.0883601988371	0.0	0.0	0.0	0.0	0.0016136244570899999	9.95327500277e-05	0.000348364625097	0.1261826438476	0.0004866772113414041	0.001740932984931236
11225508	0.00887321430735	9.95327500277e-05	0.000348364625097	0.0378224450105	0.0	0.00129032258065	0.0	0.004615718775209623	0.004351759088530078	0.0147750151954747	0.018938297504062	1.65896355039969	0.062220009955181926	0.05242739948203287
11225480	0.0013611588389200002	0.0		0.0286405488205	0.0	0.0	0.0	0.0	0.0013611588389200002	0.0	0.0014432248754020006	1.2007695225556	0.033230690274580726	0.029152564634875762
11225486	0.00495456941543	0.0		0.0199563163806	0.0	0.0	0.0	0.0	0.00495456941543	0.0	0.0014432248754020006	1.1920852901157	0.032913966196477594	0.02887470946298408
11225456	0.00644020817917	0.0	0.0006718460626869999	0.0292626285081	0.0	0.0	0.0	0.013840683860781458	0.004406077940337129	0.019256106097597	0.032885839264052	1.64498306901889	0.07316849816847695	0.07580910062575749
11225474	0.00446036619633	0.0	0.0	0.0	0.0	0.0	0.0	0.01805962505830847	0.0031313561898345084	0.04379772561154202	0.24443583178248496	1.991901174865	0.03385109801823593	0.06035670170654901
11227614	0.0018873042519199999	0.0		0.0633525953926	0.0	0.0	0.0	0.0	0.0018873042519199999	0.0013436921253699998	4.97663750139e-05	0.28351903845359994	0.004166345189412293	0.00021735909785766002
11225402	0.0016691453071300002	0.0	0.0	1.1500753699	0.0	0.0213488597768	0.0	0.000904355287509426	0.0016691453071300002	0.019256106097597	0.031442614388649995	1.6229294651837898	0.08568075117366064	0.08839263003471348
11225522	0.0	0.0		0.0	0.0	0.0	0.0	0.0	0.0	0.0	0.0	0.020136746290465	0.0	0.0
11227620	0.00826504815679	0.0		0.046332495137900005	0.0	0.0	0.0	0.0	0.00826504815679	0.0013436921253699998	4.97663750139e-05	0.2664989381989	0.0042600189334153285	0.000222246076627732
11227532	0.0	0.0		0.0005225469376459999	0.0	0.0	0.0	0.0	0.0	0.0	0.0	0.08681744121171299	0.0	0.0
11227530	0.006328185394850001	0.0		0.034015317322	0.0	0.0	0.0	0.0	0.01377676040559145	0.0	0.0	0.120310211596067	0.0	0.0
11230070	0.0	0.0		0.0	0.0	0.229787234043	0.0	0.0	0.0	0.0	0.0	0.0	0.28167709057218165	0.038440086519844055
11228270	0.394302454133	0.0		0.0	0.0	0.0123456790123	0.0	0.0	0.394302454133	0.0	0.0	0.0567312356452	0.16884823922476175	0.02607116489396965
11228288	0.666807737007	0.0		0.0	0.0	0.333333333333	0.0	0.0	0.666807737007	0.0	0.0	0.0567312356452	0.1837396672598805	0.03521526286023364
11230046	0.0	0.0		0.0	0.0	0.09	0.0	0.0	0.0073691606495777376	0.0	0.0	0.0	0.04678991114935728	0.0
11228274	0.10484571219000001	0.0		0.0	0.0	0.115384615385	0.0	0.0	0.10484571219000001	0.0	0.0	0.0567312356452	0.18318140137036407	0.03630748877018748
11228318	0.0010681535966600001	0.0		0.00491372907163	0.0	0.0	0.0	0.0	0.0010681535966600001	0.0	0.0	0.06164496471683	0.13321230982040666	0.02057544086268118
11230066	0.040722782761699994	0.0		0.0	0.0	0.0415451895044	0.0	0.0	0.03540560338895194	0.0	0.0	0.0	0.03603448275863562	0.0
11230052	0.0892530515161	0.0		0.0	0.0	0.028781793842	0.0	0.0	0.023652716931328255	0.0	0.0	0.0	0.02456515105279442	0.0
11230288	0.0	0.0		0.0400621738663	0.0	0.0	0.0	0.0	0.0	0.0002115959887305	0.0	0.14884602273929998	0.0011078286558357754	0.0
11228816	0.0	0.0		0.0	0.0	0.0	0.0	0.0	0.0	0.0	0.0	0.0	0.0	0.0
11225440	0.0	0.0	0.0	0.0336918358844	0.0	0.0028195488721799995	0.0	0.0052420044237191646	0.0	0.019256106097597	0.031442614388649995	1.0503603747151902	0.07232551348191882	0.06955946705608003
11228222	0.195587022619	0.0		0.0	0.0	0.3125	0.0	0.0	0.195587022619	0.157346706837	0.0	0.173544161953	0.140765044814449	0.05400488529314966
11227862	0.00387806910912	0.0		0.0	0.0	0.0	0.0	0.0	0.00387806910912	0.0	0.0	0.014023095900501001	0.007219471947199066	0.0
11227670	0.021457523538799997	0.0		0.00900771387751	0.0	0.0	0.0	0.0	0.0070081308536084855	0.0	0.0	0.009828859065239	0.002360515021456116	0.0002014790041043045
11227652	0.00269541856373	0.0		0.0201304986931	0.0	0.0	0.0	0.0	0.00269541856373	0.0	0.0	0.030855152508587995	0.0017994438082750695	0.00015358942567087502
11228202	0.0	0.0	0.0	0.0	0.0	0.0100314712825	0.0	0.0048632561777071145	0.0	4.340917970988298	3.7462399760284	5.8264559972987	0.1667051435957235	0.14072296630445286
11228780	0.00253842146169	0.0	0.0	0.000821145187729	0.0	0.00260293421675	0.0	0.00022217041153006602	0.003918159989834968	0.00644474556429	0.00731565712704	0.010800071457196	0.11165433403809466	0.09449920246368854
11227622	0.0	0.0013436921253699998	4.97663750139e-05	0.220166443061	0.0	0.00566215791129	0.0	0.00029539595966584153	0.0004985826524630877	0.0013436921253699998	4.97663750139e-05	0.220166443061	0.00566215791129	0.00029539595966584153
11227602	0.0	0.000217811899347	6.2231971242e-05	0.012477510234	0.0	0.00374732334047	0.0	0.0015523675214631485	0.0	0.00093347956863	0.098767444938842	0.18944149826	0.007755946225438976	0.05945468802459624
11227502	0.0	0.0		0.004544317485850001	0.0	0.0	0.0	0.0	0.0061665667322537655	0.0023763862082	0.0005419828194140001	0.30601183803785	0.00978871874398593	0.020254007433446318
11225530	0.0137789429117	0.0		8.33819722175e-05	0.0	0.0	0.0	0.0	0.0137789429117	0.0	0.0	0.0175102141656225	0.0	0.0
11225516	0.0	0.0		0.0622863332464	0.0	0.0	0.0	0.0	0.0	0.000895794750249	0.0311027618991	0.41987462065612	0.0022648631645150376	0.013138005976116337
11225454	0.0	0.0		0.0	0.0	0.0	0.0	0.0	0.0	0.0	0.0	0.0	0.0	0.004781234944012237
11230276	0.013294022042200001	0.0		0.0672875244163	0.0	0.0	0.0	0.0	0.013294022042200001	0.0009874479474095	0.0	0.21263045800876001	0.01691161667002541	0.0
11230078	0.00533239273728	0.0		0.0	0.0	0.0	0.0	0.0	0.00533239273728	0.0	0.0	0.0	0.02592470277411189	0.0
11228206	0.0	0.0		0.0	0.0	0.00309428467419	0.0	0.0	0.0	0.0	0.0	0.0	0.133253865048457	0.0
11228182	0.0	0.0		0.0	0.0	0.008354381192930001	0.0	0.0	0.0	0.0	0.0	0.0	0.2345327215649261	0.03568410047451363
11203476	0.0	0.0		0.0	0.0	0.0	0.0	0.0	0.00040001094240472887	0.0	0.0	0.0	0.0565817161561719	0.0
11200206	0.0	0.0		0.0	0.0	0.0	0.0	0.0	0.001267893564086542	0.0	0.0	0.000347953436176	0.022140221402222486	0.0
11203536	0.0	0.0		0.0	0.0	0.0555555555556	0.0	0.0	0.0	0.0	0.0	0.0	0.02345107122176495	0.0
11204634	0.00132806100492	0.0		0.0	0.0	0.0238095238095	0.0	0.0	0.000374617420263754	0.0	0.0	0.0	0.051428571428557286	0.0
11202960	0.0033072076724999996	0.0		0.0	0.0	0.0319091400757	0.0	0.0	0.007081544984060173	0.0	0.0	0.0	0.07099493650748988	0.0
946040028	0.246850766158	0.0		0.0	0.0	0.303376906318	0.0	0.0	0.039961315691276734	0.0	0.0	0.0	0.09305707015628403	0.0
11199976	0.0	0.0		0.000207111275813	0.0	0.0	0.0	0.0	0.01199462154978496	0.129094666102739	0.0	1.3293754310644812	0.05041347626337587	0.0
11198150	0.0219165341218	0.128930423525		1.3101630426200002	0.0	0.07853855005749999	0.0	0.0	0.014829268114060138	0.2532929730954	0.0	2.514082220583	0.10712886799835654	0.0
11199960	0.0	0.0		0.00492803006273	0.0	0.0	0.0	0.0	0.015542916437385375	0.0	0.0	0.02074158512186	0.00011190689346433547	0.0
11227852	0.00129116792744	0.0		0.0130258979698	0.0	0.0	0.0	0.0	0.0016784886478454994	0.0	0.0	1.249414729330501	0.057388743154331186	0.0238481172093978
11227836	0.10272835571799999	0.0		0.0009971979307010002	0.0	0.00357781753131	0.0	0.0	0.04718793682954569	0.0	0.0	1.2363888313607008	0.06528112239558488	0.02712782634504265
11227818	0.00412324980277	0.0		0.0	0.0	0.0	0.0	0.0	0.029520333821148555	0.0	0.0	1.23539163343	0.07346140163645519	0.03072428191883107
11228800	0.0	0.0		0.0	0.0	0.0532188841202	0.0	0.0	0.026936253891496648	0.0	0.0	1.23539163343	0.09270482603819327	0.03877259549891544
11227868	0.2996470731800001	0.000124649741338		0.00243066995608	0.0	0.0512820512821	0.0	0.0	0.2996470731800001	0.07329404790655701	0.0296043135677	0.5486458364979799	0.12238526381551006	0.04924918450009904
11227878	0.06338712626450001	0.0		0.00205672073207	0.0	0.0	0.0	0.0	0.06338712626450001	0.07597401734531899	0.0296043135677	0.67447975037827	0.09853690081668592	0.03825361036791298
11227920	0.0167938337312	0.0		0.0353382016692	0.0	0.0	0.0	0.0	0.0167938337312	0.07597401734531899	0.0296043135677	0.6839531307198999	0.0883269328311877	0.03428993651629966
11227884	0.13442271643	0.0		0.010158953919	0.0	0.0	0.0	0.0	0.13442271643	0.07597401734531899	0.0296043135677	0.6486149290507	0.10450960219506356	0.040572309144500315
11203468	0.0	0.0		0.0	0.0	0.00284090909091	0.0	0.0	0.0005438724903236035	0.0	0.0	0.0	0.05753685211601217	0.0
11198210	0.15779892089000006	0.00671746322769		0.109337433387	0.0	0.0603588907015	0.0	0.0	0.06527040384991227	0.028013250906991	0.0	1.545630798123	0.02445158585999976	0.0
11199978	0.0	0.0		0.00319195025077	0.0	0.0	0.0	0.0	0.00796431367331576	0.129094666102739	0.0	1.329168319788668	0.05067733990145388	0.0
11203464	0.0	0.0		0.0	0.0	0.0106761565836	0.0	0.0	0.00024837816366725087	0.0	0.0	0.0	0.03938379102478764	0.0
11203408	0.0	0.0		0.0	0.0	0.504807692308	0.0	0.0	0.0	0.0	0.0	0.0	0.02579111029815984	0.0
11203358	0.0	0.0		0.0	0.0	0.0539937527889	0.0	0.0	0.0	0.0	0.0	0.0	0.014466693910912591	0.0
11227902	0.0	0.0		0.0330321814545	0.0	0.0	0.0	0.0	0.0	0.07597401734531899	0.0296043135677	0.7054552111006999	0.08674921719351134	0.033677441920114695
11227874	0.172726973832	0.0		0.0238081005955	0.0	0.0	0.0	0.0	0.04663146968541576	0.07597401734531899	0.0296043135677	0.6724230296461999	0.09908957893051708	0.03846816890436122
11227880	0.18590339880800005	0.0		0.010158953919	0.0	0.0	0.0	0.0	0.16652387933651785	0.07597401734531899	0.0296043135677	0.6486149290507	0.10450960219506356	0.040572309144500315
11227876	0.09477390972860003	0.0028046191800999995		0.0922408085898	0.0	0.0233039875712	0.0	0.0	0.11931654085476225	0.07597401734531899	0.0296043135677	0.6384559751316999	0.10599078341041834	0.0411473275246893
11227870	0.14688044707800002	0.0005609238360190001		0.035961450375900005	0.0	0.0155979202773	0.0	0.0	0.1258495128432249	0.07316939816521899	0.0296043135677	0.5462151665419	0.12267502612363995	0.04944988650589882
11227894	0.000877636463336	0.0086008321523	0.0	0.126207863104	0.0	0.0219824140687	0.0	0.0010262487470059788	0.000877636463336	0.6543568089693	1.3060775149833002	2.294989070007	0.17440334618223727	0.0971707726026665
11227984	0.000899431153721	0.00317856840411	0.0009971979307010002	0.101838838673	0.0	0.0422932330827	0.0	0.003965739601809628	0.000899431153721	0.6489345452211099	1.307074712914001	2.270620045576	0.1724463817312265	0.09249226919273124
11227838	0.0017362017874999998	0.439771774705	1.28900050042	1.35338209182	0.0	0.34887275506300003	0.0	0.1804637654566479	0.00100508926572622	0.645755976817	1.3060775149833002	2.168781206903	0.2421800947867521	0.13992318943090035
11227916	0.00143816398629	0.0		0.103147660957	0.0	0.0	0.0	0.0	0.0008568224246694433	0.07260847432919999	0.0296043135677	0.613401377123	0.09017027863802106	0.0366281280078523
11227928	0.000205115798211	0.0		0.0401995415814	0.0	0.0	0.0	0.0	0.000205115798211	0.07260847432919999	0.0296043135677	0.6536009187044001	0.07093710040816124	0.028815406068407205
11203290	0.0	0.0		0.0	0.0	0.0222315436242	0.0	0.0	0.0	0.0	0.0	0.0	0.005603362017219397	0.0
11203276	0.0	0.0		0.0	0.0	0.0	0.0	0.0	0.0	0.0	0.0	0.0	0.0003942181340338831	0.0
11203242	0.0	0.0		0.0	0.0	0.000615510874025	0.0	0.0	0.0	0.0	0.0	0.0	0.04329725228979995	0.0
11203168	0.0	0.0		0.0	0.0	0.0	0.0	0.0	0.0	0.0	0.0	0.0	0.08724123362915083	0.0
11203092	0.043868752647400006	0.0		0.0	0.0	0.128062015504	0.0	0.0	0.010978990611353129	0.0	0.0	0.0	0.07685604740326203	0.0
11203508	0.009589483300020001	0.0		0.025630977994300003	0.0	0.0	0.0	0.0	0.010357787832712215	0.0	0.0	0.0722369469731	0.0	0.0
11200152	0.0	0.0		0.0209528482219	0.0	0.0	0.0	0.0	0.0	4.94611231261e-05	0.0	0.11029098033296	0.00023457658925643814	0.0
11199958	0.0	0.0		0.0104225703799	0.0	0.0	0.0	0.0	0.0	0.0	0.0	0.031797672345424	7.578628268262992e-05	0.0
11227860	0.0173259308591	0.07260847432919999	0.0296043135677	0.510253716166	0.0	0.129545201824	0.0	0.05262264137233978	0.025137107019842456	0.2785926764412	0.046681328131	1.325652831249	0.2099860474388109	0.11771897087025615
11228802	0.0331251419632	0.205984202112	0.0170770145633	0.8153991150830001	0.0	0.155011506009	0.0	0.0900727390408362	0.02862676528942492	0.205984202112	0.0170770145633	0.8153991150830001	0.2332145265388974	0.13651649491016116
11228088	0.0	0.0		0.0	0.0	0.0	0.0	0.0	0.0	0.0	0.0	0.0	0.02510312315852968	0.0
11228106	0.0	0.0		0.0	0.0	0.0	0.0	0.0	0.0	0.0	0.0	0.0	0.00717238025774267	0.0
11228118	2.08671353672e-05	0.0		0.0	0.0	0.0113974873721	0.0	0.0	2.08671353672e-05	0.0	0.0	0.0	0.05101566789137077	0.0
11228332	0.0	0.0		0.00072883062785	0.0	0.145768025078	0.0	0.0	0.0	0.0	0.0	0.00072883062785	0.297108208954944	0.0
11228160	0.0	0.0		0.0	0.0	0.0006783110055959999	0.0	0.0	0.0	0.0	0.0	0.0	0.02370839447061469	0.0
11228228	0.00014804100266100002	0.0		0.0	0.0	0.024367341189700003	0.0	0.0	0.00014804100266100002	0.0	0.0	0.0	0.02899368628970444	0.0
11228144	0.0	0.0		0.0	0.0	0.041997492687	0.0	0.0	0.00012087886968283072	0.0	0.0	0.0	0.03952675450390872	0.0
11203236	0.0030517307075199995	0.0		0.0107410393393	0.0	0.0	0.0	0.0	0.010850065073816029	0.0	0.0	0.01590411404319	0.0	0.0
11198108	0.0	0.0		0.000109647146019	0.0	0.0	0.0	0.0	0.002043104924137853	0.129094666102739	0.0	1.3258362648513191	0.055424607717665234	0.0
11200202	0.0	0.0		0.000347953436176	0.0	0.0	0.0	0.0	0.0005767883042225196	0.0	0.0	0.000347953436176	0.02403495994174261	0.0
11200162	0.0	0.0		0.00246835552025	0.0	0.0	0.0	0.0	0.0	4.94611231261e-05	0.0	0.22367720809706	0.0008210601939736051	0.0
11198160	0.015376387497	0.0205303222174		0.067339456873	0.0	0.225631768953	0.0	0.0	0.02158660867742382	0.1243625495704	0.0	1.2039191779629999	0.13695478191264746	0.0
11230118	0.0	0.0003996813120469999		0.13441047417500002	0.0	0.00230571002306	0.0	0.0	0.0	0.0003996813120469999	0.0	0.13513930480285002	0.06871913418087856	0.0
11207814	0.00805356721841	0.0		0.373218132503	0.0	0.0	0.0	0.0	0.005291523381879225	2.23773713515e-05	0.0	0.9942955363081101	0.00010057326762550035	0.0
11207782	0.0007880294851860001	0.0		0.323219265538	0.0	0.0	0.0	0.0	0.0007880294851860003	0.0	0.0	1.207839036823	0.0	0.0
11208468	0.00815664045963	0.0		0.5114016387820001	0.0	0.0	0.0	0.0	0.0060594634221847726	0.0009174722254095	0.0	0.7766225120692101	0.0033109908745872	0.0
11207830	0.025036052491099997	0.0		0.00162156682927	0.0	0.0	0.0	0.0	0.008107455042614556	0.0009174722254095	0.0	0.26522087328721	0.004475493941710871	0.0
11228136	0.0	0.0		0.0	0.0	0.0	0.0	0.0	0.0	0.0	0.0	0.0	0.022779043280194332	0.0
11228096	0.000179381017394	0.0		0.0	0.0	0.045013239188	0.0	0.0	5.764001494821384e-05	0.0	0.0	0.0	0.06705443371377262	0.0
11228050	0.0	0.0		0.0	0.0	0.0336175395859	0.0	0.0	1.3623807895328192e-05	0.0	0.0	0.0	0.07018423361322122	0.0
11228154	0.0	0.0		0.0	0.0	0.0	0.0	0.0	0.0	0.0	0.0	0.0	0.005036278275731216	0.0
11228092	0.0	0.0		0.0	0.0	0.0	0.0	0.0	0.0	0.0	0.0	0.0	0.03045903045904824	0.0
11228080	0.0	0.0		0.0	0.0	0.0136764024108	0.0	0.0	0.0	0.0	0.0	0.0	0.06439042493968307	0.0
11228026	0.0	0.0		0.0	0.0	0.07479358912089999	0.0	0.0	0.0	0.0	0.0	0.0	0.08284822407826414	0.0
11228180	0.0	0.0		0.0	0.0	0.017699115044200003	0.0	0.0	0.0	0.0	0.0	0.0	0.03982666116382022	0.0
11211078	0.00909522774717	0.0		0.00765638818484	0.0	0.0	0.0	0.0	0.008112434648366208	0.0009174722254095	0.0	0.26359930645794	0.004479405659348114	0.0
11209696	0.0008197362982010001	2.23773713515e-05		0.100397810009	0.0	0.00082304526749	0.0	0.0	0.006210103275572814	0.0187522371925045	0.041912816541314006	0.9182727848516	0.024575072194141248	0.046575815102651366
11209712	0.0	0.000358037941623		0.0141424986941	0.0	0.0253164556962	0.0	0.0	0.0	0.018729859821153	0.041912816541314006	0.8178749748426001	0.025147870271150525	0.047699026077795685
11209736	0.0	0.000537056912435		0.14140260957	0.0	0.00330487469017	0.0	0.0	0.0001354905514984606	0.01837182187953	0.041912816541314006	0.8037324761485	0.025145728643238337	0.04830497149450256
11200200	0.0	0.0		0.0	0.0	0.0486725663717	0.0	0.0	0.00014071671599802745	0.021295787679301	0.0	1.436293364736	0.02122841777526461	0.0
11209740	0.0	0.0		0.0029090582756900003	0.0	0.0	0.0	0.0	0.00011714147069532588	0.017834764967095	0.041912816541314006	0.6623298665785	0.028878742233126836	0.05656120155929915
11209746	0.0	0.000290905827569	0.0007832079973010001	0.0269030245599	0.0	0.011026293469	0.0	0.028892302845441063	0.0	0.017834764967095	0.041912816541314006	0.65942080830281	0.028967373341543336	0.05673479229074796
11228130	0.0	0.0		0.0	0.0	0.00379426644182	0.0	0.0	0.0	0.0	0.0	0.0	0.04650055546738898	0.0
11228084	0.0	0.0		0.0	0.0	0.08465608465610001	0.0	0.0	0.0	0.0	0.0	0.0	0.0722830236701504	0.0
11228172	0.0	0.0		0.0	0.0	0.0299278846154	0.0	0.0	0.0	0.0	0.0	0.0	0.042868988391388564	0.0
11228076	0.0	0.0		0.0	0.0	0.0716577540107	0.0	0.0	0.0	0.0	0.0	0.0	0.10489285138835984	0.0
11228216	0.0	0.0		0.0	0.0	0.0586027862026	0.0	0.0	0.0	0.0	0.0	0.0	0.08228474892226005	0.0
11228004	0.0	0.0		0.0	0.0	0.085720730882	0.0	0.0	0.0	0.0	0.0	0.0	0.13334614891707205	0.023957858186121526
11227964	0.0	0.0		0.0	0.0	0.344594594595	0.0	0.0	0.0	0.0009971979307010002	0.429402732647	0.582846564233	0.1513808996393633	0.12548910723642098
11228114	0.00021127407605299998	0.0		0.0	0.0	0.057694181853599986	0.0	0.0	0.00021127407605299998	0.0009971979307010002	0.429402732647	0.582846564233	0.12454550245048765	0.0925413559161139
11227938	0.0	0.0		0.0	0.0	0.345015576324	0.0	0.0	0.0	0.0009971979307010002	0.429402732647	0.582846564233	0.149315711551873	0.12683041282779714
11207524	0.030825164146500002	0.10117264618	0.10117264618	0.101271582127	0.0	0.407407407407	0.0	0.4375608319487666	0.04225972139481717	0.10780135462099001	0.11057156113364	0.11076943302752	0.9664634146344252	0.9900422795737274
11201582	0.00414124197673	0.0		0.00207111275813	0.0	0.0	0.0	0.0	0.0005956790155857021	0.0	0.0	0.019212616585713	0.0001151941020616636	0.0
11199982	0.0	0.0		0.00014010468657899998	0.0	0.0	0.0	0.0	0.002057219096932788	0.129094666102739	0.0	1.325976369537898	0.05513499028603276	0.0
11209824	0.0004665233126909999	0.0171410664552	0.0401673815759	0.623464271714	0.0	0.0293295404385	0.0	0.057055333249289485	0.0006266747980521132	0.01895363353467	0.04124149540077	0.8868154021600001	0.03473645278341616	0.04550861908513453
11209750	0.0	0.000402792684326	0.000962226968113	0.00905351202891	0.0	0.0448877805486	0.0	0.10599981934464013	0.0025000704578500145	0.017543859139526004	0.041129608544013006	0.63251778374291	0.029481046164334775	0.057531953345072176
11209830	0.00335582121368	0.00181256707947	0.00107411382487	0.112819652953	0.0	0.0432086614173	0.0	0.047314743868764574	0.0022293383934976234	0.00181256707947	0.00107411382487	0.263351130446	0.0384569953257457	0.03756322649665457
11209854	0.0029413098733699996	0.0	0.0	0.150531477493	0.0	0.0374737785381	0.0	0.03554543833550434	0.003012375755105873	0.027620921260700003	0.0322674313793	0.790241653603	0.05148193887003177	0.042532039272475404
11209866	0.0008090917855130001	0.0	0.0	0.0	0.0	0.0919348377621	0.0	0.04732773374800377	0.0024429194097247784	0.1362126661407	1.0607160882293	20.44456144841	0.029391515966596164	0.11802190658907268
11228082	0.0	0.0		0.0	0.0	0.0025599765945000003	0.0	0.0	0.0	0.0	0.0	0.0	0.03677661297194817	0.0
11228002	0.004639534275229999	0.0		0.0	0.0	0.0845415560547	0.0	0.0	0.0038335947601115844	0.0009971979307010002	0.429402732647	0.582846564233	0.12485153164118265	0.09701722571168653
11227904	0.0	0.0	0.0	0.0	0.0	0.544704264099	0.0	0.5142865678852993	0.0	0.0009971979307010002	0.429402732647	0.582846564233	0.13980082547639075	0.13299688070128315
11228126	0.0	0.0		0.00704271038558	0.0	0.00211375864719	0.0	0.0	0.0	0.0	0.0	0.00704271038558	0.030161524917714375	0.0
11228140	0.0	0.0		0.0	0.0	0.0	0.0	0.0	0.0	0.0	0.0	0.0	0.011855905152754823	0.0
11228164	0.0	0.0		0.0	0.0	0.0	0.0	0.0	0.0	0.0	0.0	0.0	0.011768699784990979	0.0
11228138	0.0	0.0		0.0	0.0	0.0	0.0	0.0	0.0	0.0	0.0	0.0	0.03074996521497188	0.0
11228836	0.000362054253741	0.0		0.241010274876	0.0	0.0	0.0	0.0	0.000362054253741	0.0	0.0	0.241010274876	0.014936469316031556	0.0
11228148	0.0	0.0		0.0	0.0	0.0431714404317	0.0	0.0	0.0002913744565560673	0.0	0.0	0.0	0.05395958492626994	0.0
11228156	0.0	0.0		0.0	0.0	0.0	0.0	0.0	0.0	0.0	0.0	0.0	0.038403424830006	0.0
11200182	0.0	0.0		0.0250191101986	0.0	0.0	0.0	0.0	0.0	4.94611231261e-05	0.0	0.21954700343685002	0.0008306510227371843	0.0
11209868	0.0	0.0	0.0	0.0	0.0	1.0	0.0	1.0	0.0008090377704395297	0.1362126661407	1.0607160882293	20.44456144841	0.025402800013616226	0.12253044510123985
11209874	6.54291631895e-05	0.027620921260700003	0.0322674313793	0.63971017611	0.0	0.0545242747633	0.0	0.0526876725503585	6.542670464806576e-05	0.1362126661407	1.0607160882293	20.44456144841	0.025398650230984445	0.12252670888291407
11209882	0.00375203031107	0.10859174488	1.02844865685	19.8048512723	0.0	0.0216765989733	0.0	0.13145164962465314	0.0035823099829358257	0.10859174488	1.02844865685	19.8048512723	0.0216765989733	0.13145164962465314
11203696	0.0117796003669	0.0		0.0	0.0	0.0	0.0	0.0	0.0117796003669	0.0	0.0	0.0	0.0	0.0
11200184	0.0	4.94611231261e-05		0.0447124314414	0.0	0.0007515971439310003	0.0	0.0	0.0	4.94611231261e-05	0.0	0.1926236399979	0.0009405125793536118	0.0
11200180	0.0	0.0		0.00190425324035	0.0	0.0	0.0	0.0	0.0	4.94611231261e-05	0.0	0.19452789323825	0.00093627479665069	0.0
11200166	0.0	0.0		0.0016618491399600002	0.0	0.0	0.0	0.0	0.0	4.94611231261e-05	0.0	0.22120885257681	0.0008267452074594969	0.0
11198200	0.0319828695486	0.103832227353		1.13657972109	0.0	0.131751747511	0.0	0.0	0.022865170340332964	0.131845478259991	0.0	2.682210519213	0.0691645209979095	0.0
11228178	0.0	0.0		0.0	0.0	0.0	0.0	0.0	0.0	0.0	0.0	0.0	0.038740920096839104	0.0
11228174	9.92373130225e-05	0.0		0.0	0.0	0.0	0.0	0.0	9.92373130225e-05	0.0	0.0	0.0	0.021058569145428568	0.0
11228162	0.0	0.0		0.0	0.0	0.0	0.0	0.0	9.021310968148572e-05	0.0	0.0	0.0	0.05385837895106969	0.0
11228168	0.0	0.0		0.0	0.0	0.056593977154699986	0.0	0.0	0.0	0.0	0.0	0.0	0.0608287056813464	0.0
11228188	0.0	0.0		0.0	0.0	0.00649486695998	0.0	0.0	0.0	0.0	0.0	0.0	0.041337195647082936	0.0
11228200	0.0	0.0		0.0	0.0	0.000742500742501	0.0	0.0	0.0	0.0	0.0	0.0	0.0340708565223434	0.0
11228194	0.0	0.0		0.0	0.0	0.128571428571	0.0	0.0	0.0	0.0	0.0	0.0	0.062125000000025736	0.0
11228218	0.0	0.0		0.0	0.0	0.000694766095415	0.0	0.0	0.0	0.0	0.0	0.0	0.03199228028505385	0.0
11204648	0.0037078648131	0.0		0.0	0.0	0.0	0.0	0.0	0.003438377363862743	0.00205547199585	0.00205547199585	0.00226101919543	0.04458974485031195	0.034677983157860415
11203262	0.0626526563499	0.00205547199585	0.00205547199585	0.00226101919543	0.0	0.113709020247	0.0	0.08843287850737022	0.04620459628097054	0.00205547199585	0.00205547199585	0.00226101919543	0.06658900279592288	0.060751850834573774
11204690	0.000561969797207	0.0		0.0464442406956	0.0	0.0	0.0	0.0	0.000561969797207	0.0002369604117124	0.0	0.089503332652375	0.0011022498865347755	0.0
11203606	0.492073943683	0.00196399341803		0.00196399341803	0.0	0.640569395018	0.0	0.0	0.031084566934661675	0.00981996709015	0.0	1.09918164962503	0.047576897543701084	0.0
11203706	0.0	3.38514873874e-05		0.00983385708605	0.0	0.0007199424046080001	0.0	0.0	0.0	0.0002369604117124	0.0	0.043059091956775	0.0017150928167903394	0.0
11203684	0.0	0.0		0.000203108924325	0.0	0.0	0.0	0.0	0.0	0.000203108924325	0.0	0.033225234870725	0.00579199194157745	0.0
11200226	0.0072533596703900005	0.0		0.0	0.0	0.0	0.0	0.0	0.00017192795036815857	0.0	0.0	0.002985622202686	0.02118100128370513	0.0
11200188	0.0	0.0		0.0135721325705	0.0	0.0	0.0	0.0	0.00022903359488867281	0.0	0.0	0.1479112085565	0.0009729654597236256	0.0
11203682	0.000231027681093	0.000203108924325		0.0330221259464	0.0	0.00257874378339	0.0	0.0	0.0002305181548711444	0.002167102342355	0.0	0.03498611936443	0.027998727330586715	0.0
11228214	0.0	0.0		0.0	0.0	0.0	0.0	0.0	0.0	0.0	0.0	0.0	0.03076806199196396	0.0
11228266	0.0	0.0		0.0	0.0	0.0	0.0	0.0	0.0	0.0090171222655	0.0	0.0181282871927	0.02127272727271026	0.0
11228246	0.0	0.0		0.0	0.0	0.0	0.0	0.0	0.0	0.0090171222655	0.0	0.0181282871927	0.02045812204929296	0.0
11228254	0.0	0.0		0.0	0.0	0.00225988700565	0.0	0.0	0.0	0.0543819553277	0.000329149315803	3.2030630658627004	0.08847736625511307	0.007971968790357052
11228124	0.0	0.0		0.0464320286483	0.0	0.012180101272799998	0.0	0.0	0.0	0.0	0.0	0.0464320286483	0.031122247131773417	0.0
11228150	0.0	0.0		0.0	0.0	0.042487338210500006	0.0	0.0	0.0	0.0	0.0	0.0	0.052524271844675036	0.0
11228170	0.0005246598708219999	0.0		0.0	0.0	0.047638436482100005	0.0	0.0	0.00021440343473191879	0.0	0.0	0.0	0.058847568451184724	0.0
11228196	0.0	0.0		0.0	0.0	0.0621957815035	0.0	0.0	0.00016396038207645142	0.0	0.0	0.0	0.061662746702138	0.0
11228208	0.0	0.0		0.0	0.0	0.064082278481	0.0	0.0	0.0002313816919983537	0.0	0.0	0.0	0.04885774620850716	0.0
11203662	0.0	0.0		0.0	0.0	0.0	0.0	0.0	0.0	0.00196399341803	0.0	0.00196399341803	0.047319053618943285	0.0
11203656	0.0	0.0		0.0	0.0	0.0	0.0	0.0	0.0	0.00196399341803	0.0	0.00196399341803	0.04903525315539125	0.0
11203652	0.0025092547563200004	0.0		0.0	0.0	0.008916990920879999	0.0	0.0	0.0019544239597148326	0.00981996709015	0.0	0.8916530117860301	0.03610842207163978	0.0
11227516	0.000795799850883	0.0		0.0278912697067	0.0	0.0	0.0	0.0	0.000795799850883	0.0	0.0	0.10706245232710004	0.03443921478591023	0.037639722084341416
11227524	0.00356028062492	0.0		0.0307679477482	0.0	0.0	0.0	0.0	0.00356028062492	0.0	0.0	0.09026098492530002	0.032622879512838626	0.035654591026174215
11227540	0.0	0.0		0.00400233466644	0.0	0.0	0.0	0.0	0.0	0.0	0.0	0.00400233466644	0.0	0.0
11228212	0.0	0.0		0.0	0.0	0.0654205607477	0.0	0.0	0.0	0.0	0.0	0.0	0.05008833004263374	0.0
11228256	0.0	0.0		0.0	0.0	0.060120240481	0.0	0.0	0.0	0.0543819553277	0.000329149315803	3.2030630658627004	0.08472169632713447	0.006234798006998292
11228284	0.0	0.0		0.0	0.0	0.00844051446945	0.0	0.0	0.0	0.0543819553277	0.000329149315803	3.2030630658627004	0.09335635270794093	0.008423096891863923
11228298	0.0	0.0		0.0	0.0	0.0	0.0	0.0	0.0	0.0	0.0	0.0	0.0	0.0
11230050	0.0	0.0		0.0	0.0	0.0	0.0	0.0	0.0	0.0090171222655	0.0	0.0181282871927	0.040419161676604254	0.0
11230030	0.0	0.0		0.0	0.0	0.0	0.0	0.0	0.0	0.0090171222655	0.0	0.0181282871927	0.02483646770234513	0.0
11230762	0.0	0.0		0.0	0.0	0.0	0.0	0.0	0.0	0.0543819553277	0.000329149315803	3.2030630658627004	0.08294800947329536	0.007428037233103637
11228312	0.932051026697	0.0		0.0	0.0	0.846153846154	0.0	0.0	0.007974145327256592	0.0543819553277	0.000329149315803	3.2030630658627004	0.10969524833034942	0.010111983748511548
11228322	0.19727562417800001	0.0		0.0	0.0	0.162162162162	0.0	0.0	0.006456202509742482	0.0543819553277	0.000329149315803	3.2030630658627004	0.1107180490741698	0.009914858670168593
11228316	0.018801314187599998	0.0		0.0	0.0	0.0	0.0	0.0	0.018801314187599998	0.0543819553277	0.000329149315803	3.2030630658627004	0.1084512428297866	0.010074861360754105
11227548	0.0	0.0		0.0	0.0	0.0	0.0	0.0	0.0	0.0	0.0	0.0	0.0	0.0
11229258	0.0	0.0		0.0	0.0	0.0	0.0	0.0	0.0	0.0	0.0	0.0	0.0	0.0
11227564	0.013426147769	0.0		0.0	0.0	0.0	0.0	0.0	0.00025794473417402666	0.0	0.0	0.04269156977530001	0.0432276657060611	0.047244901884250436
11227558	0.0	0.0		0.0	0.0	0.0	0.0	0.0	0.0	0.0	0.0	0.04269156977530001	0.03235198964737022	0.03535852680650254
11227560	0.00205710438398	0.0		0.0	0.0	0.0	0.0	0.0	0.00020623314914468012	0.0	0.0	0.04269156977530001	0.040683482506111215	0.04446428248938135
11227574	0.0	0.0		0.0	0.0	0.0	0.0	0.0	0.0	0.0	0.0	0.04269156977530001	0.03494874184530103	0.03819660054481571
11227580	0.0075175059113900015	0.0		0.0	0.0	0.0	0.0	0.0	0.0057429229761340895	0.0	0.0	0.04269156977530001	0.018852510525989068	0.020604513232998056
11229260	0.00209503030852	0.0		0.0	0.0	0.0	0.0	0.0	0.00209503030852	0.0	0.0	0.0	0.0	0.0
11228314	0.218147383398	0.0		0.0	0.0	0.0993975903614	0.0	0.0	0.016440247771964255	0.0543819553277	0.000329149315803	3.2030630658627004	0.10895958198858613	0.0101220848541463
11228320	0.0	0.0		0.0	0.0	0.0	0.0	0.0	0.0	0.0	0.0	0.0	0.0	0.0
11230016	0.0	0.0		0.0	0.0	0.0	0.0	0.0	0.0	0.0	0.0	0.0	0.0	0.0
11228282	0.0	0.0		0.0	0.0	0.0	0.0	0.0	0.0	0.0543819553277	0.000329149315803	3.2030630658627004	0.08117560782983564	0.0074309704006239015
11228296	0.12558794818	0.0		0.0	0.0	0.131578947368	0.0	0.0	0.007230821258848483	0.0543819553277	0.000329149315803	3.2030630658627004	0.10942133678043467	0.010016638452730584
11228302	0.232425551041	0.0		0.0	0.0	0.107255520505	0.0	0.0	0.03137242739376293	0.0543819553277	0.000329149315803	3.2030630658627004	0.1091622432494469	0.010133765081303172
11228304	0.153008553868	0.0090171222655		0.0181282871927	0.0	0.102950819672	0.0	0.0	0.07275910585721931	0.0543819553277	0.000329149315803	3.2035803005018195	0.17855602518764166	0.04888912305961148
11227572	0.0	0.0		0.0	0.0	0.0	0.0	0.0	0.0	0.0	0.0	0.04269156977530001	0.04192286193405032	0.045818840005128286
11227562	0.015987059476299997	0.0		0.0	0.0	0.0	0.0	0.0	0.0018106321288758023	0.0	0.0	0.04269156977530001	0.04333381482017392	0.04736091565458588
11227554	0.0	0.0		0.0	0.0	0.0	0.0	0.0	0.0012845178939883946	0.0	0.0	0.04269156977530001	0.04653327128898155	0.050857704215402214
11227514	0.015255822777799997	0.0		0.00212624029155	0.0	0.0	0.0	0.0	0.000973424200891048	0.0	0.0	0.08129742291195001	0.04148230088496462	0.04533733670861422
11227508	0.000252090939431	0.0		0.062870007052	0.0	0.0	0.0	0.0	0.000252090939431	0.0	0.0	0.14416742996395002	0.02423263327948821	0.02648462189634072
11227526	0.00308550094806	0.0		0.0196781454433	0.0	0.0	0.0	0.0	0.0011917338892106653	0.0	0.0	0.07917118262040003	0.04302925989673896	0.04702805781364
11227546	0.0	0.0		0.0168014674018	0.0	0.0	0.0	0.0	0.0012181557742940881	0.0	0.0	0.059493037177100014	0.05012531328321872	0.05478356208466133
11227570	0.00562030560222	0.0	0.0	0.04269156977530001	0.0	0.067084078712	0.0	0.07331834058065699	0.004041795193468598	0.30233938564	0.4762990930191	3.9145925235953	0.09505212072479624	0.09947296599690826
11227624	0.017422841726099998	0.216279890967	0.0234946403652	5.48152912868	0.0	0.0977460796416	0.0	0.06712101053593776	0.01318373025711226	0.40913679306381	0.09799490376095002	8.732646634433351	0.0949968886123444	0.07818608360784418
11227732	0.00018164068518400006	0.0	0.0	0.0	0.0	0.0464216634429	0.0	0.004397442805470468	0.00018164068518400006	0.0	0.0	0.0397039976524	0.09359057601327499	0.10854605269962796
11230082	0.000139305593803	4.7021330829e-05		0.000164574657902	0.0	0.0016866752654000005	0.0	0.0	0.000139305593803	0.535530701203219	0.000329149315803	3.899800091317302	0.06750559880557358	0.004682692129389638
11230088	0.0015728436459499999	4.7021330829e-05		0.00025861731956	0.0	0.0017652250662	0.0	0.0	0.0015728436459499999	0.4948915118893391	0.0	0.75696194115106	0.05709176831214409	0.0
11230122	0.0	0.036656255697400005		0.045555824635800005	0.0	0.00792153904187	0.0	0.0	0.0	0.06369352092411	0.0	0.5102049018659001	0.04292841028249991	0.0
11230132	0.0	0.000846383954922		0.00991052755126	0.0	0.014693877551	0.0	0.0	0.0	0.024263006707802	0.0	0.4877537805530101	0.04343507659396282	0.0
11230164	0.0	0.0		0.05332688163430002	0.0	0.0	0.0	0.0	0.0	0.0197724696136	0.0	0.34006606119855004	0.05875408014443901	0.0
11230182	0.00208592560768	0.00183383190233		0.190793718166	0.0	0.028487947406900006	0.0	0.0	0.0007129277635535938	0.022687792125	0.0	0.52640372618955	0.06677681398869198	0.0
11230278	0.0	0.00366766380466		0.184548605357	0.0	0.0129385419259	0.0	0.0	0.0	0.01923172430906	0.0	0.4857969937983	0.04428084231042788	0.0
11230302	8.58734365204e-05	0.000164574657902		0.0181282871927	0.0	0.0022343872193100003	0.0	0.0	8.58734365204e-05	0.26317357017406795	0.0	0.4823706397201341	0.058312325859155766	0.0
11227722	0.0	0.0		0.046571082846599984	0.0	0.0	0.0	0.0	0.0	0.007601974211868	0.0	2.2288615490016	0.14393005268480333	0.012891906219553944
11227694	0.00254738459851	0.0		0.0	0.0	0.0	0.0	0.0	0.00254738459851	0.00249617063673	0.0	0.460195573323	0.0012056115738669215	0.0
11227728	0.0	0.0		0.0	0.0	0.0	0.0	0.0	0.0	0.00249617063673	0.0	0.460195573323	0.0009971897380075961	0.0
11227704	0.0	0.0		0.0	0.0	0.0	0.0	0.0	0.0	0.00249617063673	0.0	0.460195573323	0.0010522288119343593	0.0
11227702	0.0	0.0		0.0	0.0	0.0	0.0	0.0	0.0	0.00249617063673	0.0	0.460195573323	0.0012304938754921185	0.0
11227736	0.0	0.0		0.0	0.0	0.0	0.0	0.0	0.0	0.00941737103858	0.0	1.103677972758	0.004467168998921108	0.0
11230304	0.0	0.0		0.0	0.0	0.0034036759700500005	0.0	0.0	0.0	0.263197080839482	0.0	0.4647360765011391	0.10350251677859296	0.0
11230274	0.0192311089775	0.0		0.0	0.0	0.337662337662	0.0	0.0	0.0004911427500058043	0.263197080839482	0.0	0.4647360765011391	0.14807517429534034	0.0
11230308	0.10244090422499999	0.0		0.000141063992487	0.0	0.0	0.0	0.0	0.10244090422499999	0.003573621143005	0.0	0.14292133505466298	0.03607503607500848	0.0
11230312	0.0131114185381	0.0		0.00888703152668	0.0	0.0	0.0	0.0	0.0131114185381	0.00197489589482	0.0	0.16967647229628002	0.00904684975764756	0.0
11230306	0.010933753337100002	0.0		0.0107443740944	0.0	0.0	0.0	0.0	0.010933753337100002	0.00197489589482	0.0	0.17153381486400002	0.008629545921487323	0.0
11230776	0.004799077374819999	0.0		0.0464335641936	0.0	0.0	0.0	0.0	0.006998464240341165	0.003573621143005	0.0	0.189213835255776	0.028919565049719525	0.0
11230310	0.0017369720380699999	0.00197489589482		0.114355876576	0.0	0.0133715377268	0.0	0.0	0.004084862058814382	0.003761706466321	0.0	0.144825698953238	0.048727576136790365	0.0
11230314	0.0	0.000188085323316		0.053416231821800005	0.0	0.00238521168754	0.0	0.0	0.0	0.001974895894817	0.0	0.083886054199038	0.04769890068936915	0.0
11230298	0.0	0.000235106654145		0.0004467026428759999	0.0	0.0579710144928	0.0	0.0	0.0016815623891440498	0.0017868105715010004	0.0	0.030469822377238	0.08767315448004116	0.0
11228334	0.0	0.0		0.0	0.0	0.06812339331619999	0.0	0.0	0.0	0.0	0.0	0.0	0.2613835376530821	0.0
11230764	0.0	0.0		0.199276400053	0.0	0.0	0.0	0.0	0.0	0.0	0.0	0.199276400053	0.04497852783844191	0.0
11227892	0.0149237039344	0.0		0.000186974612006	0.0	0.0	0.0	0.0	0.002078652031717368	0.0	0.0	0.05671563230860599	0.0005955926146512561	0.0
11230248	0.0008927236476839999	0.0		0.0264494985913	0.0	0.0	0.0	0.0	0.0008927236476839999	4.7021330829e-05	0.0	0.11778843372669	0.00015975716910301456	0.0
11227978	0.0	0.0		0.0603304748074	0.0	0.0	0.0	0.0	0.0	0.0	0.0	0.117046107116006	0.00040774719673780186	0.0
11228100	0.0	0.0		0.0	0.0	0.0	0.0	0.0	0.0011869122224746275	0.0	0.0	0.0	0.0	0.0
11227888	0.0	0.0		0.0	0.0	0.0	0.0	0.0	0.0	0.0	0.0	0.0565286576966	0.0006156687702012988	0.0
11227954	0.00120514320477	0.0		0.153319181845	0.0	0.0	0.0	0.0	0.00120514320477	0.0	0.0	0.2100348141536061	0.000312719881166276	0.0
11227908	0.00256989782382	0.0		0.0	0.0	0.0	0.0	0.0	0.001044903510783956	0.0	0.0	0.05671563230860599	0.0005016302984697564	0.0
11228330	0.0	0.0016222359136		0.0554616597128	0.0	0.0480624812256	0.0	0.0	0.0	0.0016222359136	0.0	0.0554616597128	0.143376845709317	0.0
11227754	0.00118881315368	0.0		0.81681510972	0.0	0.0	0.0	0.0	0.0011888131536800005	0.0006807738100180001	0.0	2.3556231764400004	0.0974757793449695	0.014406694498371881
11227696	0.0	0.0		0.0	0.0	0.0	0.0	0.0	0.0002112273148094604	0.00249617063673	0.0	0.460195573323	0.0009056852332108015	0.0
11229268	0.000604966153205	0.0		0.0	0.0	0.0	0.0	0.0	0.000604966153205	0.0	0.0	0.0	0.0	0.0
11227698	0.0	0.0		0.0	0.0	0.0	0.0	0.0	0.0	0.00249617063673	0.0	0.460195573323	0.0012374845314390586	0.0
11227700	0.0	0.0		0.0	0.0	0.0	0.0	0.0	0.00047099843485097617	0.00941737103858	0.0	1.103677972758	0.004343048506093568	0.0
11227724	0.002238458778	0.00249617063673		0.460195573323	0.0	0.0014110704893800002	0.0	0.0	0.0019685154722656664	0.010098144848598	0.0	2.6424860394780003	0.057142857142903264	0.005032102182657657
11227740	0.00036715919610300014	0.00692120040185		0.643482399435	0.0	0.0441389290883	0.0	0.0	0.0020860911339664373	0.007601974211868	0.0	2.182290466155	0.20151792724434084	0.028604131853414882
946040207	0.598965795472	0.0	0.0	0.0	0.0	0.581369248036	0.0	0.1290782215315833	0.17720377251366662	0.0	0.0	0.0	0.10356103462915844	0.06425101173266759
11228268	0.0	0.0		0.0	0.0	0.20987654321	0.0	0.0	0.0	0.0	0.0	0.0	0.36122177954823104	0.0
11228112	0.000980743193172	0.0		0.0	0.0	0.07106555988480001	0.0	0.0	0.000980743193172	0.0	0.0	0.0	0.07017263427109377	0.0
11228104	0.0	0.0		0.0	0.0	0.00635727908455	0.0	0.0	0.0	0.0	0.0	0.0	0.015316718587739073	0.0
11228102	0.00131065784332	0.0		0.0	0.0	0.0	0.0	0.0	0.0009457568119744848	0.0	0.0	0.0	0.0	0.0
11227834	0.011394003775200001	0.0		0.0	0.0	0.0	0.0	0.0	0.013860060504058806	0.0	0.0	0.0	0.0160835214447067	0.0
11228250	0.0	0.0		0.0	0.0	0.379464285714	0.0	0.0	0.0	0.0	0.0	0.0	0.379464285714	0.0
11227866	0.00110117995915	0.0		0.0	0.0	0.017434747145200002	0.0	0.0	0.003436145436631437	0.0	0.0	0.0	0.019035447635709846	0.0
946040206	0.10191025168500001	0.0006807738100180001		1.53880806672	0.0	0.141254257664	0.0	0.0	0.07989039387554517	0.0006807738100180001	0.0	1.53880806672	0.10884965703349032	0.05523614612045169
11227744	0.7288062474779999	0.0	0.0	0.0	0.0	0.95015576324	0.0	0.7146139311067373	0.20574873373622848	0.0	0.0	0.0397039976524	0.13003873939893415	0.14582825172742825
11227734	0.0429375118524	0.0	0.0	0.0397039976524	0.0	0.101516793066	0.0	0.1260470812961435	0.09707498443311616	0.00644474556429	0.00731565712704	0.049682923921867	0.14676363017777114	0.14190661790752854
11227746	0.402168837953	0.0	0.0	0.0	0.0	0.6772486772490001	0.0	0.27403195830464505	0.19078792502741554	0.0	0.0	0.0	0.08922196025578369	0.06230554039784665
11227790	0.0	0.0		0.0	0.0	0.0	0.0	0.0	0.0	0.0	0.0	1.23539163343	0.06177363626847556	0.02712782634504265
11227808	0.0	0.0		0.0	0.0	0.0	0.0	0.0	0.0	0.0	0.0	0.0	0.00020795785387494532	0.0
11229282	0.0037267806365	0.0		0.0	0.0	0.0	0.0	0.0	0.0037267806365	0.0	0.0	0.0	0.0	0.0
11229678	0.00563531902747	0.0		0.0	0.0	0.0	0.0	0.0	0.00563531902747	0.0	0.0	0.0	0.0	0.0
11228090	0.0	0.0		0.0	0.0	0.0552407932011	0.0	0.0	0.0	0.0	0.0	0.0	0.05524079320110002	0.0
11227798	0.0028867194879900002	0.0		0.0	0.0	0.0	0.0	0.0	0.0028867194879900002	0.0	0.0	0.0	0.020428643108013	0.0
11227976	0.0	0.0		0.0	0.0	0.0	0.0	0.0	0.0	0.0	0.0	0.0603304748074	0.0	0.0
11228086	0.0	0.0		0.0	0.0	0.0	0.0	0.0	0.0	0.0	0.0	0.0	0.0	0.0
11228810	0.00148282710099	0.0		0.0	0.0	0.0	0.0	0.0	0.00148282710099	0.0	0.0	0.0	0.01150043715112796	0.0
11227982	0.0	0.0		0.0102212787897	0.0	0.0	0.0	0.0	0.0	0.0	0.0	0.0705517535971	0.0	0.0
11227806	0.0	0.0		0.0	0.0	0.0	0.0	0.0	0.0019217225244785386	0.0	0.0	0.0	0.02553077129802824	0.0
11228808	0.000252158836711	0.0		0.0	0.0	0.029191846768400007	0.0	0.0	0.0007533510612375897	0.0	0.0	0.0	0.02678450951287721	0.0
11227974	0.0	0.0		0.0653164644609	0.0	0.0	0.0	0.0	0.0	0.0	0.0	0.135868218058	0.0	0.0
11229284	0.0	0.0		0.0	0.0	0.0	0.0	0.0	0.004916851175880971	0.0	0.0	0.0	0.0	0.0
11227822	0.0	0.0		0.0	0.0	0.0	0.0	0.0	0.004465571864985757	0.0	0.0	0.0	0.0	0.0
11227854	0.0	0.0		0.0	0.0	0.0	0.0	0.0	0.0	0.0	0.0	0.0	0.0	0.0
11227848	0.0	0.0		0.0	0.0	0.0	0.0	0.0	0.0	0.0	0.0	0.0	0.0	0.0
11227890	0.0	0.0		0.0	0.0	0.0	0.0	0.0	0.0	0.0	0.0	0.0	0.00014694357366770965	0.0
11227812	0.11067095711100004	0.0		0.0	0.0	0.0	0.0	0.0	0.11067095711100004	0.0	0.0	1.23539163343	0.09190712855132804	0.0384389688333955
11227842	0.0	0.0		0.0	0.0	0.0	0.0	0.0	0.0	0.0	0.0	1.2363888313607008	0.06090056651692041	0.025307469175766987
11230190	0.00342769704815	0.0		0.00418489844378	0.0	0.0	0.0	0.0	0.00342769704815	0.0	0.0	0.045963350885379985	0.000621062904799881	0.0
11227872	0.0	0.0		0.0	0.0	0.0221387626013	0.0	0.0	0.0007264662029557544	0.0	0.0	0.0	0.0221387626013	0.0
11227830	0.015457863781399999	0.0		0.0	0.0	0.0	0.0	0.0	0.005815774540523848	0.0	0.0	0.0	0.014429162096035912	0.0
11228094	0.0	0.0		0.0	0.0	0.0	0.0	0.0	0.0	0.0	0.0	0.0	0.0	0.0
11230224	0.0027730997219899997	0.0		0.00677107163938	0.0	0.0	0.0	0.0	0.0027730997219899997	4.7021330829e-05	0.0	0.09423074698138	0.0002508780732564776	0.0
11230198	0.000719528333641	4.7021330829e-05		0.155523051717	0.0	0.000128040973111	0.0	0.0	0.000719528333641	4.7021330829e-05	0.0	0.24310028038601	0.018562486509816	0.0
11230092	0.0	9.4042661658e-05		0.122984290783	0.0	0.0006244146113019999	0.0	0.0	0.0	0.0017162785752579998	0.0	0.1784459504958	0.06083581550678211	0.0
11227684	0.00011668226057200004	0.0		0.149636774851	0.0	0.0	0.0	0.0	0.00011668226057200004	0.0	0.0	0.17269372019620002	0.025146546597567904	0.0
11225478	0.0229672898502	0.0		0.0	0.0	0.0	0.0	0.0	0.0021453264660838468	0.04270286536124202	0.2412507837816	0.936868029754	0.03215434083604258	0.056431925438177225
11227486	0.00942386128882	0.0		0.024931209693	0.0	0.0	0.0	0.0	0.00942386128882	0.0023763862082	0.0005419828194140001	0.34253314186909994	0.00781431334626281	0.016168731040487362
11199956	0.0	0.0		0.0006335168436640001	0.0	0.0	0.0	0.0	0.02182315131174324	0.0	0.0	0.021375101965524	0.00010918222513345364	0.0
11200236	0.0011381847857200001	0.0		0.0011043739495999998	0.0	0.0	0.0	0.0	0.0005356355272284255	0.0	0.0	0.001452327385776	0.017871649065806985	0.0
11200220	0.0125227781533	0.0		0.0015332948169100005	0.0	0.0	0.0	0.0	0.00047210363714730955	0.0	0.0	0.002985622202686	0.02144249512671384	0.0
11203542	0.0	0.0		0.207528637839	0.0	0.0	0.0	0.0	0.0	0.0	0.0	0.207528637839	0.027391487568486226	0.0
11198204	0.0	0.0		0.0	0.0	0.428571428571	0.0	0.0	0.0	0.028013250906991	0.0	1.545630798123	0.02399877713237904	0.0
11227850	0.0	0.0		0.0	0.0	0.0	0.0	0.0	0.0	0.0	0.0	0.014023095900501001	0.007307652155761788	0.0
11227856	0.06174799642659999	0.0		0.0	0.0	0.0	0.0	0.0	0.06174799642659999	0.0	0.0	0.014023095900501001	0.007322175732221981	0.0
11227918	0.0	0.0		0.0	0.0	0.0	0.0	0.0	0.0	0.0	0.0	0.0588970027820688	0.0	0.0
11227960	0.0	0.0		0.06986618001969999	0.0	0.0	0.0	0.0	0.0	0.0	0.0	0.12870085793109998	0.0	0.0
11227828	0.0	0.0		0.0	0.0	0.0	0.0	0.0	0.0	0.0	0.0	1.23539163343	0.07337004796591776	0.030686074426659844
11227930	0.0	0.0		0.0440013586922	0.0	0.0	0.0	0.0	0.0	0.0	0.0	0.1011532650955688	0.0	0.0
11227924	0.00286243771938	0.0		0.0112808015911	0.0	0.0	0.0	0.0	0.0013625352049448248	0.0	0.0	0.0701778043731688	0.0	0.0
11227900	0.0	0.0		6.23248706688e-05	0.0	0.0	0.0	0.0	0.0006905223332684881	0.0	0.0	0.0588970027820688	0.0	0.0
11227858	0.0	0.0		0.0	0.0	0.0	0.0	0.0	0.0010254478397252428	0.0	0.0	0.014023095900501001	0.0073398343294581265	0.0
11227534	0.0	9.95327500277e-05		0.013859935441399998	0.0	0.00699300699301	0.0	0.0	0.00036581405261632585	9.95327500277e-05	0.0	0.013859935441399998	0.00699300699301	0.0
11229274	0.035110869280000005	0.0		0.0	0.0	0.0	0.0	0.0	0.035110869280000005	0.0	0.0	0.0	0.0	0.0
11211024	0.014140855272899999	0.0		0.0	0.0	0.0	0.0	0.0	0.014140855272899999	0.0	0.0	0.0	7.745933384965145e-05	0.0
11207462	0.0619205996655	0.0	0.0	0.0	0.0	1.0	0.0	1.0	0.2517658815969805	0.0155329436602	0.0185999580135	0.0185999580135	0.907407407407576	1.0
11202592	1.0	0.0	0.0	0.0	0.0	0.733162283515	0.0	1.0	0.7608570211858816	0.0	0.0	0.0	0.7405247813411948	1.0
11205460	0.0	0.0	0.0	0.0	0.0	0.185454545455	0.0	0.3806259030132322	0.0	0.0	0.0	0.0	0.01962365591401461	0.19161639655177606
11202630	1.0	0.0	0.0	0.0	0.0	0.970976253298	0.0	1.0	1.0	0.0	0.0	0.0	0.9339002705837888	1.0
11202476	1.0	0.0	0.0	0.0	0.0	1.0	0.0	1.0	1.0	0.0	0.0	0.0	0.7457091237581043	1.0
11202556	1.0	0.0	0.0	0.0	0.0	0.7887931034479999	0.0	1.0	1.0	0.0	0.0	0.0	0.7480386240193779	1.0
11200292	0.020766069326400002	0.0		0.0	0.0	0.0	0.0	0.0	0.0010326484865129056	0.0	0.0	0.0	0.0	0.0
11200306	0.0128809631748	0.0		0.0	0.0	0.0	0.0	0.0	0.003824799636558287	0.0	0.0	0.0	0.0	0.0
11200320	0.051659495925699996	0.0		0.0	0.0	0.0	0.0	0.0	0.039305715715718524	0.0	0.0	0.0	0.0	0.0
11200344	0.0066664379173599995	0.0		0.0	0.0	0.0	0.0	0.0	0.0033325420461906064	0.0	0.0	0.0	0.002989880404777438	0.019731570644753938
11200422	0.0189387067955	0.0		0.0	0.0	0.0	0.0	0.0	0.008818074738688026	0.0	0.0	0.0	0.006610951727571186	0.044831411266557736
11200430	0.0	0.0		0.0	0.0	0.0	0.0	0.0	0.008816171625547056	0.0	0.0	0.0	0.008992195452992569	0.06097954260671758
11200446	0.03926733787969999	0.0		0.0	0.0	0.0	0.0	0.0	0.00916054627858666	0.0	0.0	0.0	0.008995247793607976	0.06100024170468319
11207466	0.25148137281	0.0	0.0	0.0	0.0	1.0	0.0	1.0	0.2557961598207365	0.0155329436602	0.0185999580135	0.0185999580135	0.9251968503938892	1.0
11207468	0.0	0.0	0.0	0.0	0.0	1.0	0.0	1.0	0.2366072028620837	0.0155329436602	0.0185999580135	0.0185999580135	0.9233664963701848	1.0
11202604	1.0	0.0	0.0	0.0	0.0	1.0	0.0	1.0	1.0	0.0	0.0	0.0	0.9415584415586103	1.0
11202590	1.0	0.0	0.0	0.0	0.0	0.948717948718	0.0	1.0	0.7116948473950063	0.0	0.0	0.0	0.7406923579361309	1.0
11202504	1.0	0.0	0.0	0.0	0.0	0.8173515981739999	0.0	1.0	1.0000000022861748	0.0	0.0	0.0	0.7453966005668156	1.0
946040089	0.139353385165	0.0607327013277	0.0607327013277	0.0607327013277	0.0	1.0	0.0	1.0	0.32856169984388045	0.07070479821419001	0.07070479821419001	0.07070479821419001	1.0	1.0
11210124	0.0119212473847	0.0		0.0	0.0	0.0	0.0	0.0	0.013212737253044195	0.0	0.0	0.0	6.407381303254951e-05	0.0
11208430	1.0	0.0	0.0	0.0	0.0	1.0	0.0	1.0	0.5841043634897496	0.005740036256609999	0.00466986000538	0.005740036256609999	0.27667943277091883	0.27277339618350505
11207474	0.454689527654	0.0	0.0	0.0	0.0	0.996598639456	0.0	1.0	0.3199133533214329	0.0155329436602	0.0185999580135	0.0185999580135	0.9228896103898044	1.0
11205330	0.022918006719900002	0.0		0.0	0.0	0.0	0.0	0.0	0.01314768722327703	0.0	0.0	0.0	0.006742370475506612	0.08042764558024383
11205338	0.0	0.0		0.0	0.0	0.0	0.0	0.0	0.0	0.0	0.0	0.0	0.012313674659739229	0.14688600469548094
11205426	0.0	0.0	0.0	0.0	0.0	0.0179186767746	0.0	0.1182534378544316	0.0	0.0	0.0	0.0	0.012721665381641016	0.167345140863164
11205470	0.0	0.0	0.0	0.0	0.0	0.053149606299199986	0.0	0.3697395389708919	0.0	0.0	0.0	0.0	0.01343214451135067	0.20281696651151912
11205500	0.0	0.0	0.0	0.0	0.0	0.0012987012987	0.0	0.0761033366841506	0.0	0.0	0.0	0.0	0.04110371075169621	0.21292040213704466
11205558	0.0	0.0	0.0	0.0	0.0	0.0015806111696500002	0.0	0.13799911610357848	0.0	0.0	0.0	0.0	0.047937569676736805	0.2364096196172516
11205600	0.0	0.0	0.0	0.0	0.0	0.0160427807487	0.0	0.3355637701652648	0.0	0.0	0.0	0.0	0.09914275065231563	0.3333487967270897
11205604	0.0	0.0	0.0	0.0	0.0	0.103448275862	0.0	0.4222336525225448	0.0	0.0	0.0	0.0	0.12595936794589038	0.3458641237203317
11205638	0.00515403089884	0.0	0.0	0.0	0.0	0.0182186234818	0.0	0.2883167634736105	0.004382256908824372	0.0	0.0	0.0	0.07081236520491999	0.2488695827774572
11205710	0.00103674788036	0.0	0.0	0.0	0.0	0.12802768166099998	0.0	0.29824272500390525	0.001996146076578065	0.0	0.0	0.0	0.07412124299544741	0.246387806508494
11204568	1.00000001955	0.0	0.0	0.0	0.0	0.92523364486	0.0	1.0	1.0000000025969584	0.0	0.0	0.0	0.7504456327989201	1.0
11207388	0.0784024323816	0.06114597944540001	0.0233493000269	0.394830963109	0.0	0.5058350100600001	0.0	0.1948816260111517	0.0784024323816	0.12253518076601602	0.053071013186109	0.466824638191859	0.6353089533416129	0.2768431333650532
11207444	1.0	0.0342942844145	0.0342942844145	0.0342942844145	0.0	1.0	0.0	1.0	0.3153671383105064	0.18090843083367	0.18188131833467008	0.18188131833467008	0.9946509761967244	1.0
946040090	0.980094346695	0.0	0.0	0.0	0.0	1.0	0.0	1.0	0.4201167580493899	0.0	0.0	0.0	1.0	1.0
11207532	1.0	0.00938110824791	0.00938110824791	0.00938110824791	0.0	1.0	0.0	1.0	0.3455528927840078	2.2337298801283403	2.23504327825434	2.23504327825434	0.9936305732480896	1.0
11207476	0.266580551421	0.0	0.0	0.0	0.0	0.8206521739129999	0.0	1.0	0.2592649166660853	0.0155329436602	0.0185999580135	0.0185999580135	0.9071618037136968	1.0
11205720	0.0	0.0	0.0	0.0	0.0	0.628205128205	0.0	1.0	0.002005053024862252	0.0	0.0	0.0	0.0619634774465597	0.2346927296822305
11205726	0.0	0.0	0.0	0.0	0.0	0.277777777778	0.0	1.0	0.0	0.0	0.0	0.0	0.05498498972983379	0.2252609131101361
11205744	0.0	0.0	0.0	0.0	0.0	0.236559139785	0.0	0.6447901880050183	0.0	0.0	0.0	0.0	0.04957264957265271	0.44308977678951145
11205862	0.0	0.0	0.0	0.0	0.0	0.051624316500500006	0.0	0.2167434595673182	0.0	0.0	0.0	0.0	0.04769612603863433	0.4410655900793526
11208340	0.0044455240824399994	0.0	0.0	0.0	0.0	0.0396851426697	0.0	0.8985385344951708	0.001462652738465475	0.0	0.0	0.0	0.041174593041786056	0.9012588546682976
11208344	0.0033804713416300002	0.0	0.0	0.0	0.0	0.206227436823	0.0	1.0	0.00365305975821102	0.0	0.0	0.0	0.3516275873915149	1.0
11206348	0.40314537483499996	0.0	0.0	0.0	0.0	0.72196969697	0.0	1.0	0.1673038787126651	0.0	0.0	0.0	0.8167823724721986	1.0
11206484	0.646017316716	0.0	0.0	0.0	0.0	0.899931459904	0.0	1.0	0.530655329208652	0.0	0.0	0.0	0.9095309009679848	1.0
11206502	1.0	0.0	0.0	0.0	0.0	0.972222222222	0.0	1.0	0.364693548820828	0.0	0.0	0.0	0.9265707797123928	1.0
11208436	1.0	0.0	0.0	0.0	0.0	0.916666666667	0.0	1.0	0.5591739364609608	0.0	0.0	0.0	0.4815187688767741	0.4630471047365658
11207360	1.0	0.0	0.0	0.0	0.0	1.0	0.0	1.0	0.612509488931786	0.00788038875908	0.00788038875908	0.00788038875908	1.0	1.0
11205444	0.0	0.0	0.0	0.0	0.0	0.502732240437	0.0	0.5097632016282677	0.0	0.0	0.0	0.0	0.040880503144683285	0.2016156533807964
11207454	0.968202197525	0.00865869875997	0.00865869875997	0.00865869875997	0.0	1.0	0.0	1.0	0.2170644565404263	0.18956712959364	0.19054001709464	0.19054001709464	0.9948940515699648	1.0
11207486	0.9914431553059999	0.0	0.0	0.0	0.0	1.0	0.0	1.0	0.5433737034181756	0.0	0.0	0.0	0.4769655573318102	0.4574286468875661
11211036	0.00429648032313	0.0323740998865	0.381010970887	0.701060186431	0.0	0.0451831938712	0.0	0.11076942392669414	0.004952181662597689	0.0323740998865	0.381010970887	0.701060186431	0.0451831938712	0.11076942392669414
11207594	0.010115498733200001	1.5441630082299995	0.259386586658	3.20133122537	0.0	0.26935483871	0.0	0.0944284072972338	0.042261031562042736	1.6519643628509897	0.36995814779164	3.31210065839752	0.8182441700963101	0.7996168334792739
11205468	0.0	0.0	0.0	0.0	0.0	0.0	0.0	0.4855300573674855	0.0	0.0	0.0	0.0	0.007870017771012592	0.19054819827365627
11206560	0.31885280827199997	0.0	0.0	0.0	0.0	0.769230769231	0.0	1.0	0.11522667698576372	0.0	0.0	0.0	0.9598792062122964	1.0
11208480	0.0277714206099	0.0	0.0	0.0	0.0	0.926829268293	0.0	1.0	0.12430112345711355	0.0	0.0	0.0	0.9984439834024964	1.0
11206578	0.0	0.0	0.0	0.0	0.0	1.0	0.0	1.0	0.03406008177603164	0.0	0.0	0.0	1.0	0.9412780428893078
11206580	0.0	0.0	0.0	0.0	0.0	1.0	0.0	1.0	0.026642380141971046	0.0	0.0	0.0	1.0	0.9400714273322388
11206524	0.026634901331599996	0.0		0.00362448790838	0.0	0.0	0.0	0.0	0.039333623547691696	0.0	0.0	0.06601321420024	0.0	0.0
11206546	0.0446833767845	0.0		0.012774834431200002	0.0	0.0	0.0	0.0	0.0446833767845	0.0	0.0	0.07011304478514999	0.0	0.0
11206512	0.00554796113078	0.0		0.0335710765285	0.0	0.0	0.0	0.0	0.012219824144264244	0.0	0.0	0.07219266899486	0.0	0.0
11206412	0.00520652881732	0.0		0.00249554905167	0.0	0.0	0.0	0.0	0.011058898037955898	0.0	0.0	0.06773633140256	0.0	0.0
11203124	1.0	0.0189103423618	0.0189103423618	0.0189103423618	0.0	1.0	0.0	1.0	1.0	0.12528101814679998	0.1292891885387	0.1292891885387	0.9689984101746772	1.0
11204604	1.0	0.0611502918764	0.0651584622683	0.0651584622683	0.0	0.938485804416	0.0	1.0	1.0	0.20174457639218	0.20760267158038004	0.20760267158038004	0.9279964221823922	1.0
11207488	0.727076819731	0.0155329436602	0.0185999580135	0.0185999580135	0.0	0.8301647655259999	0.0	1.0	0.5475732505783545	0.0155329436602	0.0185999580135	0.0185999580135	0.916519694297664	1.0
11208438	0.17472790324999998	0.0	0.0	0.0	0.0	0.936708860759	0.0	1.0	0.5178509675925422	0.0	0.0	0.0	0.4922731104242862	0.4754940319237626
11202572	1.0	0.0	0.0	0.0	0.0	1.0	0.0	1.0	1.0	0.0	0.0	0.0	0.8997148288976131	1.0
11203090	1.0	0.0137716623722	0.0143883039709	0.0143883039709	0.0	0.957142857143	0.0	1.0	1.0	0.10904278937959	0.11150935577459004	0.11150935577459004	0.8314868804665067	1.0
11203094	1.0	0.0748191806488	0.0748191806488	0.0748191806488	0.0	1.0	0.0	1.0	1.0	0.0748191806488	0.0748191806488	0.0748191806488	0.8555256064689434	1.0
11203088	1.0	0.0246656639501	0.0283655135427	0.0283655135427	0.0	0.8626198083069999	0.0	1.0	1.0	0.12805590534108	0.13596947252519004	0.13596947252519004	0.8783868935099112	1.0
11206344	0.000146162927689	0.0		0.00867500384629	0.0	0.0	0.0	0.0	0.0016702022169476952	0.0	0.0	0.07944164481159	0.05284466226294854	0.0
11206380	0.0015084438838299998	0.0		0.017647096865400003	0.0	0.0	0.0	0.0	0.002130828120385045	0.0	0.0	0.09708874167699	0.01465850515463684	0.0
11206684	0.0007753017687519999	0.0		0.0581106422032	0.0	0.0	0.0	0.0	0.0007753017687519999	0.0	0.0	0.4184203909966701	6.435420554728941e-05	0.0
11206644	0.0	0.0		0.00184195287147	0.0	0.0	0.0	0.0	0.005909333303372685	0.0	0.0	0.3603097487934699	8.150623522694025e-05	0.0
11206640	0.0098501741657	0.0		0.0911469582206	0.0	0.0	0.0	0.0	0.006028251259478176	0.0	0.0	0.358467795922	8.173273395989619e-05	0.0
11206622	0.00457336246014	0.0		0.0311349453114	0.0	0.0	0.0	0.0	0.0077771608692492455	0.0	0.0	0.2673208377014	0.00013008976193564848	0.0
11208352	0.00147436182333	0.0		0.23618589239	0.0	0.00014338973329499998	0.0	0.0	0.003430836687431994	0.0	0.0	0.23618589239	0.05151861528409885	0.0
11206500	0.09410461747360001	0.0		0.0	0.0	0.016266460108399997	0.0	0.0	0.02719740136447251	0.0	0.0	0.0	0.11945392491460816	0.0
11206490	0.00276220688485	0.0		0.0	0.0	0.152899824253	0.0	0.0	0.015987382980190496	0.0	0.0	0.0	0.152899824253	0.0
11202606	1.0	0.0	0.0	0.0	0.0	0.921052631579	0.0	1.0	1.0	0.0	0.0	0.0	0.8989854433174195	1.0
11203078	1.0	0.0452203839086	0.0452203839086	0.0452203839086	0.0	1.0	0.0	1.0	1.0	0.14059428451578002	0.14244420931208002	0.14244420931208002	0.8596230158730351	1.0
11203080	1.0	0.00811911438359	0.0104829071788	0.0104829071788	0.0	0.752212389381	0.0	1.0	1.0	0.10339024139098	0.10760395898249003	0.10760395898249003	0.8157582938389171	1.0
11203072	1.0	0.0080163407838	0.0080163407838	0.0080163407838	0.0	1.0	0.0	1.0	1.0	0.10339024139097999	0.10524016618728002	0.10524016618728002	0.8292094146047309	1.0
11207516	0.384236177879	0.0	0.0	0.0	0.0	0.999441964286	0.0	0.9333128089521632	0.384236177879	0.159187938531	0.199751676751	0.206369367806	0.776792750197	0.8662852089390343
11203064	1.0	0.00143883039709	0.00143883039709	0.00143883039709	0.0	1.0	0.0	1.0	1.0	0.09527112700739	0.09712105180369003	0.09712105180369003	0.8203174603174851	1.0
11203062	1.0	0.00154160399688	0.00154160399688	0.00154160399688	0.0	1.0	0.0	1.0	1.0	0.09537390060718	0.09722382540348004	0.09722382540348004	0.8204314720812429	1.0
11203060	1.0	0.0938322966103	0.09568222140660004	0.09568222140660004	0.0	0.893635571055	0.0	1.0	1.0	0.0938322966103	0.09568222140660004	0.09568222140660004	0.8175011698642841	1.0
11203076	1.0	0.0388484207215	0.0388484207215	0.0388484207215	0.0	1.0	0.0	1.0	0.31231578346190564	0.0388484207215	0.0388484207215	0.0388484207215	0.059133252328895214	0.0603498433729701
11206302	0.0	0.0		0.0026143847208	0.0	0.0	0.0	0.0	0.0013236048993179464	0.0	0.0	0.07076664096530001	0.03836505828537877	0.0
11206310	0.0	0.0		0.0013666101949599998	0.0	0.0	0.0	0.0	0.0005484266105265829	0.0	0.0	0.0681522562445	0.04072043852780139	0.0
11206322	0.0	0.0		0.00582294778724	0.0	0.0	0.0	0.0	0.0	0.0	0.0	0.06678564604954	0.04132888253060117	0.0
11206320	0.000460764852665	0.0		0.0318479593261	0.0	0.0523891767415	0.0	0.0	0.0019250827643323546	0.0	0.0	0.0318479593261	0.05004812319538247	0.0
11206324	0.0	0.0		0.0291147389362	0.0	0.0	0.0	0.0	0.002775189787248864	0.0	0.0	0.060962698262300004	0.04438374871970159	0.0
11206288	0.00968463389424	0.0		0.0	0.0	0.363425925926	0.0	0.0	0.002574593728897381	0.0	0.0	0.0	0.02907971262402105	0.0
11206246	0.0	0.0		0.0	0.0	0.2	0.0	0.0	0.0013791118957915838	0.0	0.0	0.0	0.002401182120427609	0.0
11206238	0.00971613523558	0.0		0.0	0.0	0.00379048931771	0.0	0.0	0.007909179369888684	0.0	0.0	0.0	0.06828659483965886	0.0
11206146	0.0	0.0		0.0	0.0	0.0	0.0	0.0	0.009333407631133122	0.0	0.0	0.0	0.0734343628812633	0.0
11207616	0.00492764206343	0.00121617512195	0.0079051382927	0.111046413498	0.0	0.0393442622951	0.0	0.10238687431422844	0.034424700036989435	0.05518434700204998	0.16611625370570002	1.987156732257	0.036521424697180456	0.08867073395560073
11203052	1.0	0.000102773599792	0.000102773599792	0.000102773599792	0.0	1.0	0.0	1.0	1.0	0.000102773599792	0.000102773599792	0.000102773599792	0.04449762554688946	0.04573314123944565
11203074	1.0	0.0348402503296	0.0348402503296	0.0348402503296	0.0	1.0	0.0	1.0	0.2976124528219189	0.034943023929392004	0.034943023929392004	0.034943023929392004	1.0	1.0
11203042	1.0	0.0	0.0	0.0	0.0	1.0	0.0	1.0	1.0	0.0	0.0	0.0	0.9178800232964741	0.9778742545984156
11203028	1.0	0.0	0.0	0.0	0.0	1.0	0.0	1.0	1.0	0.0	0.0	0.0	0.7142857142858344	0.8097707681043577
11203024	1.0	0.0	0.0	0.0	0.0	1.0	0.0	1.0	1.0	0.0	0.0	0.0	0.9896013864818094	1.0
11203022	1.0	0.0	0.0	0.0	0.0	1.0	0.0	1.0	1.0	0.0	0.0	0.0	0.7191934279314101	0.8130383351944247
11198218	0.0	0.0		0.0	0.0	0.0	0.0	0.0	0.0	0.021295787679301	0.0	1.436293364736	0.019686162624821504	0.0
11198214	0.0227647360016	0.0207240886812		1.21218735748	0.0	0.0351606805293	0.0	0.0	0.0383303126706074	0.021295787679301	0.0	1.436293364736	0.02108801955990201	0.0
11208448	0.00400928316751	0.0165173924324	0.0891382221307	0.4243678531490001	0.0	0.0391996733361	0.0	0.1184845260947175	0.004763471668354818	0.06681572808881997	0.1847966727655	2.0583269673244	0.05596657672553853	0.11758407435426407
11207566	0.00400155604764	0.037450779447699985	0.0690728932823	1.45174246561	0.0	0.0327656822591	0.0	0.05268343756752111	0.0032180968174010875	0.06793481916251998	0.1331828836264	1.6868685646935997	0.07953615279669668	0.14933075874490925
11207568	0.015177535311399997	0.00822698022239	0.036072144052	0.0406552381901	0.0	0.194174757282	0.0	0.6623174006781792	0.00341719527624736	0.03744533067223002	0.09765075586613	0.2441391056491	0.17059270516712574	0.3471864771451117
11207590	0.005346133439859999	0.00632844632491	0.0126568926498	0.042400590376900006	0.0	0.105263157895	0.0	0.17384628849378295	0.003311625463841203	0.03372128240884	0.07621314068083	0.2184936406557	0.16896024464824194	0.33815191094014263
11203008	1.0	0.0	0.0	0.0	0.0	1.0	0.0	1.0	1.0	0.0	0.0	0.0	0.7932276657060258	0.9224617316479764
11207622	0.00925707571808	0.00187622164958	0.00276666658465	0.067272194603	0.0	0.203631647211	0.0	0.3105028101054124	0.004771017219467058	0.04315309794043	0.12209436349793	1.5144408976588002	0.04773089505914281	0.1148864770153433
11207690	0.224942853563	0.00337719896925	0.00863061958808	0.0409016319609	0.0	0.143021914648	0.0	0.29497759282327884	0.1234204269949699	0.04127687629085	0.11932769691328	1.4471687030557998	0.03695067264577225	0.10136000232364437
11207692	0.400916371597	0.0176364835061	0.0375244329916	0.0529094505182	0.0	0.178619756428	0.0	0.4384414616454276	0.03248684878615867	0.038650165981433005	0.1106970773252	1.5563442595514498	0.03344222833567548	0.08459054065409417
11198240	0.0012071600260399999	0.000571698998101		0.224106007256	0.0	0.00732377174245	0.0	0.0	0.010835628188038684	0.000571698998101	0.0	0.224106007256	0.06909288430208056	0.0
11198256	0.0	0.0		0.0	0.0	0.0337620578778	0.0	0.0	0.0	0.0	0.0	0.0	0.25119047619079343	0.0
11198284	0.525519476573	0.0		0.0	0.0	0.388059701493	0.0	0.0	0.08671641336968222	0.0	0.0	0.0	0.34641548927294386	0.0
11198310	0.373791891712	0.0		0.0	0.0	0.275317435739	0.0	0.0	0.12513012550475758	0.0	0.0	0.0	0.3586193447740179	0.0
11198312	0.200784212032	0.0		0.0	0.0	0.255623721881	0.0	0.0	0.3346411004359959	0.0	0.0	0.0	0.5034137460172785	0.0
11198308	0.34282204366400004	0.0		0.0	0.0	0.296819787986	0.0	0.0	0.3367164024560077	0.000672461756039	0.0	0.0299805866234	0.11218544688237694	0.0
11198298	0.269969217466	0.0		0.0	0.0	0.12101910828	0.0	0.0	0.32462815122536903	0.000910625294636	0.0	0.0473525153211	0.0639891918447461	0.0
11198440	0.8235936132260001	0.023174436501	0.000496028178532	0.02647798417	0.0	0.874815361891	0.0	0.017955250302563338	0.8177309591587325	0.062320980350720014	0.023720067497332003	5.427752732291559	0.07971499563193478	0.029953048788211725
11207614	0.427009888468	0.004502931959	0.0146345288667	0.0150097731967	0.0	0.149425287356	0.0	0.4486124533716269	0.03579131633716668	0.021013682475333	0.07317264433360003	1.68348023338225	0.022845624055120767	0.055656339838739764
11207642	0.033428516687599996	0.0157602618565	0.0585381154669	1.33834784738	0.0	0.0151210743365	0.0	0.05407432899773176	0.0346652834664777	0.15917332014943295	0.1621055505238	2.5587312786475502	0.08585705632948636	0.07540222460777712
11207608	0.0291812466462	0.0	0.0	0.00624519783014	0.0	0.151515151515	0.0	0.21121599551716247	0.003611788530836018	0.14341305829293302	0.10356743505689996	1.22038343126755	0.1253021994221022	0.08729549123813263
11207620	0.0045654473918100005	0.0	0.0	0.00893743631241	0.0	0.0814814814815	0.0	0.0939794455198528	0.0017619677291218242	0.14341305829293302	0.10356743505689996	1.2141382334374098	0.12519978689394667	0.08681134080408208
11207624	0.0072199051084999985	0.0007504886598330001	0.0	0.134894554314	0.0	0.0632570659489	0.0	0.060362799021155274	0.0030747704072953373	0.14341305829293302	0.10356743505689996	1.205200797125	0.12664342934014744	0.08657463949260917
11207632	0.0	0.0	0.0	0.0	0.0	1.0	0.0	0.9759123615761299	0.006514379827253293	0.7946401928351	0.7118384938509	2.931205356742	0.2009090065857093	0.14975944995520793
11207698	0.304999569863	0.06423650468059999	0.0108820855676	0.283475802295	0.0	0.401643835616	0.0	0.3000995237795957	0.1372249873682339	0.7946401928351	0.7118384938509	2.931205356742	0.1993866456020196	0.1481855328799578
11207700	0.055518000377099995	0.0784260649525	0.0926853494893	0.606785016167	0.0	0.0999060444723	0.0	0.06424431848297638	0.0427070548625091	0.8185861056848001	0.7898893144733999	2.7469452369847005	0.1913065201100113	0.14375451129178415
11207676	0.200792029865	0.651977623202	0.608271058794	2.04094453828	0.0	0.329578278452	0.0	0.2629824937243263	0.10658813543874802	1.045096022862616	1.0052795598449158	9.701867983527816	0.1106629204106731	0.08794268341327682
11199894	0.0756210803887	0.0		0.00649354764755	0.0	0.0	0.0	0.0	0.0756210803887	4.2640556785e-05	0.0	0.015350600442611996	0.00037103784586036234	0.0
11199886	0.0635192261546	0.0		0.00096245828172	0.0	0.0	0.0	0.0	0.0514809239518125	4.2640556785e-05	0.0	0.008857052795062	0.00048469741033108966	0.0
11199888	0.042105721114300006	0.0		0.00014010468657899998	0.0	0.0	0.0	0.0	0.07021936249830471	5.48235730093e-05	0.0	0.008936242400522	0.0004893891533569117	0.0
11199892	0.020233969622400004	0.0		0.00261934848822	0.0	0.0	0.0	0.0	0.026650553672760875	5.48235730093e-05	0.0	0.008796137713943001	0.000501184618188596	0.0
11199896	0.013590647402299998	0.0		0.0005177781895330001	0.0	0.0	0.0	0.0	0.010120628572439257	5.48235730093e-05	0.0	0.006176789225723	0.0005292532717476572	0.0
11199900	0.0487815735755	0.0		5.48235730093e-05	0.0	0.0	0.0	0.0	0.012162038884912466	5.48235730093e-05	0.0	0.005659011036189999	0.000584143168180304	0.0
11199902	0.166431901564	0.0		3.04575405607e-05	0.0	0.0	0.0	0.0	0.012338186250382991	5.48235730093e-05	0.0	0.0056041874631807	0.0005855112577848143	0.0
11198060	0.007678489332729998	4.2640556785e-05		0.00453208203544	0.0	0.0007446808510639997	0.0	0.0	0.009159352443434871	5.48235730093e-05	0.0	0.00557372992262	0.0009282998850683453	0.0
11198064	0.0043730155425600005	1.21830162243e-05		0.00104164788718	0.0	0.000426348326583	0.0	0.0	0.0072205150528209935	1.21830162243e-05	0.0	0.02160588761038	0.10095210926091404	0.0
11207678	0.114348410704	0.0586164094566	0.0559114051575	0.108658988989	0.0	0.448275862069	0.0	0.3756915718345004	0.10676674494882127	0.4828800885003161	0.47918700930261604	7.795849537331016	0.07634142314678986	0.062183407620163465
11207672	0.3882393060760001	0.0694202010345	0.0652925134054	0.075575289753	0.0	0.86328125	0.0	0.6751067238017585	0.11286777121527244	0.424263679043716	0.4232756041451161	7.687190548342015	0.07275464124437134	0.05953090541143671
11207666	0.8196496045020001	0.0394006546412	0.0600390927866	0.0600390927866	0.0	0.65625	0.0	1.0	0.22708584044004826	0.400437338459216	0.4199615040193161	7.692334028353616	0.07238693631782638	0.06225083163146587
11207640	0.0105637665741	0.12879521196	0.124205873202	6.831510875169999	0.0	0.020879969123900003	0.0	0.013028195062048534	0.05762309315663373	0.633088823007016	0.6312240617617161	7.905472807746015	0.0959800080214594	0.08507971714865747
11207658	0.163378693771	0.119478876353	0.124581117532	0.667906328774	0.0	0.267107309487	0.0	0.2187382904105693	0.16222856730498822	0.478401752282816	0.482627307115116	1.0465690964921162	0.3881691899483918	0.36549496208191695
11207638	1.0	0.0258918587642	0.024390881444599995	0.0273928360839	0.0	0.864583333333	0.0	0.8166887064886926	0.16189871390728724	0.504293611047016	0.5070181885597159	1.073961932576016	0.3952022143624964	0.3721556724406822
11207664	0.024816555132499998	0.0491597114888	0.04502931959	0.44950034775	0.0	0.0746496039001	0.0	0.0408770607649446	0.13180175419271548	0.4077073430887001	0.4027002648432	0.8277878711382001	0.28406042637285256	0.26532399443080706
11207668	0.46536644092699997	0.0499074958789	0.0499074958789	0.0499074958789	0.0	0.53193960511	0.0	0.5011832245477533	0.18550849797649466	0.3878166893334001	0.3869400029867001	0.4075565811217001	0.4257466529348489	0.42393862927599946
11207688	0.0254335586639	0.013508795877	0.013508795877	0.0151178163833	0.0	0.117401392111	0.0	0.10659872518187244	0.16186480406157747	0.3926948656223001	0.3918181792756001	0.4140437779169001	0.3110324863297234	0.3101721992178897
11207686	0.31997789542800004	0.0022514659795	0.0022514659795	0.0022514659795	0.0	1.0	0.0	1.0	0.1904061381501964	0.4208381903660001	0.4199615040193001	0.4405780821543001	0.433935361216496	0.4381964073122393
11198066	0.0131314318117	0.0		0.0	0.0	0.00260416666667	0.0	0.0	0.005896253037955397	0.0	0.0	0.0205642397232	0.1514924173411827	0.0
11198070	0.0487553943858	0.0		0.0	0.0	0.0189035916824	0.0	0.0	0.00850320509923019	0.0	0.0	0.0205642397232	0.1900681465490721	0.0
11199028	0.25781124024999996	0.0		0.0205642397232	0.0	0.196403582424	0.0	0.0	0.2503494939128998	0.000131191321998	0.0	0.15185395521210998	0.1420270816493435	0.0
11198152	0.042761380762800005	0.0		0.00537884420191	0.0	0.0	0.0	0.0	0.2553715489829897	0.000131191321998	0.0	0.13128971548891	0.0007272727272724394	0.0
11198184	0.159851233393	0.000131191321998		0.125910871287	0.0	0.0007496251874060001	0.0	0.0	0.08264826177025336	0.002467976170013	0.0	0.3723490393603	0.012705090450134154	0.0
11198192	0.117233526592	0.000295180474495		0.0117744211493	0.0	0.025069637883	0.0	0.0	0.0541658121576937	0.002336784848015	0.0	0.2464381680733	0.022446174988524355	0.0
11198276	0.00790226049829	0.00204160437352		0.234663746924	0.0	0.0222940226171	0.0	0.0	0.01822064140909445	0.007799558159609999	0.0	0.292397390604	0.05324410823391771	0.0
11198392	0.00175522787177	0.00486133811137		0.0402496380229	0.0	0.120779672816	0.0	0.0	0.005953631486263965	0.01253579122022	0.0	0.053554093951699994	0.36335403726696136	0.0
11207682	0.0723599924534	0.0343365305525	0.034210332865800004	0.0529506893508	0.0	0.261077844311	0.0	0.2531878048056093	0.18302825404414647	0.52102842645365	0.52015174010695	0.5407683182419499	0.4750219106045465	0.4802937815973036
11207662	0.352348152543	0.272052139189	0.271301650529	0.273177872179	0.0	0.4982630272950001	0.0	0.5039344709404964	0.20521879683928085	1.34366228637358	1.34291179771358	1.3447880193635802	0.5520020146057579	0.5597202221600126
11207598	0.836325241223	0.0127583072172	0.0127583072172	0.0127583072172	0.0	1.0	0.0	1.0	0.33509123935696256	1.07161014718458	1.07161014718458	1.07161014718458	0.6073619631902045	0.6171886724193814
11207584	0.256025640097	0.0165107505163	0.0165107505163	0.0165107505163	0.0	0.249751243781	0.0	0.2627768219026061	0.31872441602920515	1.91825852109438	1.91825852109438	1.91825852109438	0.6087620988283444	0.6185537663027559
11207572	0.385684683626	0.041276876290800006	0.041276876290800006	0.041276876290800006	0.0	1.0	0.0	1.0	0.2905195658550065	1.90174777057808	1.90174777057808	1.90174777057808	0.9853862212945044	0.9917853207100112
11207564	0.285087220199	0.041652120620699985	0.041652120620699985	0.041652120620699985	0.0	1.0	0.0	1.0	0.2781126495257526	1.86047089428728	1.86047089428728	1.86047089428728	0.9828220858897364	0.9903439720738536
11207550	0.96922799609	0.0105068412377	0.0105068412377	0.0105068412377	0.0	1.0	0.0	1.0	0.2905803668788147	1.81881877366658	1.81881877366658	1.81881877366658	0.9791044776121418	0.9882542346868518
11207544	1.0	0.00337719896925	0.00337719896925	0.00337719896925	0.0	1.0	0.0	1.0	0.2933935541340189	1.80831193242888	1.80831193242888	1.80831193242888	0.9763513513515794	0.9867066507435652
11199076	0.170416956497	0.00767445310885		0.013304455928799998	0.0	0.517096845356	0.0	0.0	0.08976632330470719	0.04761464204422	0.0232240393188	5.4154720547717154	0.07863059941813832	0.028776167070034112
11198424	0.0292305823208	0.0007936450856499999		0.000892850721357	0.0	0.888888888889	0.0	0.0	0.16766835738909214	0.039940188935370005	0.0232240393188	5.402167598842916	0.05538990423407445	0.03030143414278192
11198426	0.445848784309	0.00168649580701		0.00228172962125	0.0	0.739130434783	0.0	0.0	0.7951450335671194	0.03914654384972	0.0232240393188	5.401274748121558	0.054511828259089436	0.030333356150868563
11198420	0.410060024922	0.00401782824611		0.0050297257303100005	0.0	0.678516228748	0.0	0.0	0.01061154135963156	0.037460048042710005	0.0232240393188	5.398993018500309	0.05266370113029401	0.030415241010373725
11205352	0.0	0.0		0.02601938937	0.0	0.0	0.0	0.0	0.0	0.0	0.0	0.1403231806325371	0.0019435234937708469	0.0
11205364	0.0	0.0		0.0186412885487	0.0	0.0	0.0	0.0	0.0	0.0	0.0	0.1143037912625371	0.0023284481577884675	0.0
11205354	0.0	0.0		3.56429991371e-05	0.0	0.0	0.0	0.0	0.0	0.0	0.0	0.0956625027138371	0.002574587308801091	0.0
11205402	0.0	0.0		0.00916025077822	0.0	0.0	0.0	0.0	0.0	0.0	0.0	0.0956268597147	0.0025749772796142987	0.0
11207526	0.0457050517536	0.8231984007800001	0.8231984007800001	0.8231984007800001	0.0	1.0	0.0	1.0	0.3546400042267353	2.190576782188	2.191890180314	2.191890180314	0.9934017595304624	1.0
11207506	0.640786186057	0.859406681127	0.859406681127	0.859406681127	0.0	1.0	0.0	1.0	0.3648995804321138	1.367378381408	1.368691779534	1.368691779534	0.9932024169180896	1.0
946040243	1.0	0.00895056501031	0.00895056501031	0.00895056501031	0.0	1.0	0.0	1.0	0.9753289923617916	0.122000092640496	0.12229195889079594	0.12229195889079594	0.9976798143852992	1.0
946040242	0.998683138278	0.507971700281	0.509285098407	0.509285098407	0.0	0.993105209397	0.0	1.0	0.8017044169547237	0.566782749723696	0.5680961478496961	0.5680961478496961	0.9947866383469112	1.0
11204680	0.00249214175504	0.0		0.021570361514	0.0	0.0	0.0	0.0	0.00249214175504	0.0	0.0	0.021570361514	0.0	0.0
11204676	0.00798409371022	0.0		0.0	0.0	0.0	0.0	0.0	0.006107322880367834	0.186842404422	0.169370892458	8.874342426830003	0.045856339911373466	0.041409525004484984
11203628	0.0	0.0		0.0	0.0	0.0	0.0	0.0	0.001712577262654133	0.186842404422	0.169370892458	8.874342426830003	0.06180131477961224	0.05580827197771332
11204674	0.047243790822900006	0.186842404422	0.169370892458	8.874342426830003	0.0	0.062097639485	0.0	0.056075861264623626	0.035560147445284435	0.2486125048159	0.2011279347938	26.838838125301304	0.07281337871834227	0.06021852589271351
11205408	0.0	0.0		0.0196036495254	0.0	0.0	0.0	0.0	0.0	0.0	0.0	0.08646660893648	0.002937111264687905	0.0
11205406	0.0	0.0		0.00937410877305	0.0	0.0	0.0	0.0	0.0	0.0	0.0	0.06686295941108	0.003472222222225	0.0
11205380	0.0	0.0		0.00955232376873	0.0	0.0	0.0	0.0	0.0	0.0	0.0	0.057488850638029984	0.003795490064749632	0.0
11205498	0.0	0.0		0.0479365268693	0.0	0.00410628019324	0.0	0.0	0.0	0.0	0.0	0.09807239913060001	0.002714787607795209	0.0
11202548	0.0	0.0		0.0123022476473	0.0	0.0	0.0	0.0	0.0	0.0	0.0	0.0352215035382	0.0	0.0
11205506	0.0	0.0		0.0149143687231	0.0	0.0	0.0	0.0	0.0	0.0	0.0	0.05013587226130002	0.0	0.0
11202614	0.0	0.0		0.022919255890900003	0.0	0.0	0.0	0.0	0.0	0.0	0.0	0.022919255890900003	0.0	0.0
11202640	0.0	0.0		0.0	0.0	0.0	0.0	0.0	0.0	0.0	0.0	0.0	0.0007751937984498628	0.0
11202400	1.0	9.92056357063e-05	9.92056357063e-05	9.92056357063e-05	0.0	1.0	0.0	1.0	0.5416894377482009	0.054661678872466285	0.0386836489505963	5.055248423107586	0.09718792702516238	0.09399929404890736
11202462	0.08895668160160003	0.00719769919306	0.007118334684489998	0.007663965680880002	0.0	0.0899856351324	0.0	0.08639042690609802	0.09013696872207172	0.05456247323675999	0.03858444331489	5.05514921747188	0.0965164819346624	0.0933254774881741
11202468	0.012937737213899998	0.0	0.0	0.0	0.0	0.0062206248272	0.0	0.0054953984904912035	0.0632946475461557	0.047364774043699986	0.0314661086304	4.62782672932	0.10963437696996832	0.10609501056278428
11202522	0.156452741764	0.047364774043699986	0.0314661086304	4.62782672932	0.0	0.173021521776	0.0	0.1677572367728307	0.08418680037622905	0.05067699600479999	0.036434441572040004	4.7530287194493	0.19044247787609486	0.18260552237132047
11225466	1.4852158185600001e-06	0.0		0.0	0.0	0.0	0.0	0.0	6.728905000754432e-07	0.04270286536124202	0.2412507837816	0.936868029754	0.0272550292018422	0.04436384119313296
11227898	0.000833342592477	0.0		0.0458087799416	0.0	0.0	0.0	0.0	0.0006110849887251367	0.0	0.0	0.059831875842101	0.0044404973357042715	0.0
11232068	0.0	0.0	0.0	0.0	0.0	0.420289855072	0.0	0.23022937220248674	0.0001033713338510017	0.0	0.0	0.0	0.3225881667149705	0.1879157745146969
11227656	0.0	0.00644474556429	0.00731565712704	0.00930708020678	0.0	0.410722833892	0.0	0.2258590676855941	0.00017193048709137994	0.029735409070790007	0.03508529438474	0.5288929185387801	0.15062022212618345	0.12633229317109942
11227490	0.0309109231756	0.109081254735	0.147915613339	6.04168644428	0.0	0.090391974351	0.0	0.0733751326625982	0.024298698224240974	0.2774766634549778	1.090543796222663	7.525425920006432	0.1072370348667156	0.12460849330747845
11225592	0.27128770909	0.166678468782	0.78631295617	1.28942596389	0.0	0.299196787149	0.0	0.3841745924635605	0.04686843058343727	0.2338680484496778	1.0415836381034629	2.166196003966433	0.1809858080270204	0.32706062513027584
11202744	0.0	0.0		0.0	0.0	0.0	0.0	0.0	0.0	0.0	0.0	0.0	0.0009852216748780056	0.0
11204586	0.0	0.0		0.0	0.0	0.0009567089213110002	0.0	0.0	0.0	0.0	0.0	0.0	0.003481661658797251	0.0
11202732	0.0	0.0		0.0	0.0	0.00164473684211	0.0	0.0	0.0	0.0	0.0	0.0	0.005156683855612802	0.0
11202668	0.0	0.0		0.0	0.0	0.00339805825243	0.0	0.0	0.0	0.0	0.0	0.0	0.005996264622037536	0.0
11204570	0.0	0.0		0.0	0.0	0.006655984222850001	0.0	0.0	0.0	0.0011706265013299998	0.0011706265013299998	1.49660930341	0.047966141547092216	0.0408270602676801
11202526	0.0258036047327	0.0		0.0	0.0	0.0970873786408	0.0	0.0	0.007627419784562872	0.0011706265013299998	0.0011706265013299998	1.49660930341	0.057704041607282736	0.05045108153483554
11204566	0.00512073401388	0.0	0.0	0.0	0.0	0.122516556291	0.0	0.09605622540783068	0.006745704024588207	0.01012889540561	0.01044635343987	1.5068175633241998	0.08719498544879799	0.08367178711167908
11204562	0.08633916918439999	0.0011706265013299998	0.0011706265013299998	1.49660930341	0.0	0.0525239817581	0.0	0.04731256589398068	0.08027547782114851	0.02374982918811	0.02240063254249	1.52588488650698	0.13950849615318625	0.13310460143594252
11200114	0.006199773113770001	0.0		0.0	0.0	0.0	0.0	0.0	0.006199773113770001	0.0	0.0	0.0	0.0	0.0
11230216	0.000612240942466	0.0		0.0	0.0	0.0	0.0	0.0	0.000612240942466	0.011708311376420002	0.0	0.3930810234034	0.03330880877533265	0.0
11227864	0.024012558075900005	0.0		0.0	0.0	0.0	0.0	0.0	0.0010267358885112064	0.0	0.0	0.014023095900501001	0.00731070496083991	0.0
11227810	0.0	0.0	0.0	0.0	0.0	0.589680589681	0.0	1.0	0.00010993283213983068	0.0	0.0	0.0	0.3287780435027608	0.2067358564969608
11227626	0.00393818931027	0.0232906635065	0.0277696372577	0.519585838332	0.0	0.104483314936	0.0	0.10867826990874233	0.002518395606944028	0.21614756560330997	0.10226990065345	3.77070334408535	0.09671199175509464	0.09817121680268064
11225448	0.00629650710417	0.0	0.0	0.0	0.0	0.0	0.0	0.011543802235207463	0.0038380284489784172	0.04379772561154202	0.24443583178248496	1.991901174865	0.03581954205398236	0.060836125797663676
11230778	0.0	0.0		0.0	0.0	0.0	0.0	0.0	0.0	0.0543819553277	0.000329149315803	3.2030630658627004	0.10076032604968972	0.009023139413100892
11230234	0.0	0.0		0.0	0.0	0.0	0.0	0.0	0.0	0.011708311376420002	0.0	0.3930810234034	0.04036637756342696	0.0
11228814	0.000346375623746	0.0		0.0	0.0	0.084410899606	0.0	0.0	0.000346375623746	0.0	0.0	0.0	0.084410899606	0.0
11228834	0.0	0.0		0.0	0.0	0.00143870105847	0.0	0.0	0.0	0.0	0.0	0.0	0.024270474685339657	0.0
11200112	0.00342122579041	0.0		0.0	0.0	0.0	0.0	0.0	0.0050898051229760575	0.0	0.0	0.0	0.0	0.0
11200118	0.0139421109325	0.0		0.0	0.0	0.0	0.0	0.0	0.006743739117112166	0.0	0.0	0.0	0.0	0.0
11200138	0.00102168126269	0.0		0.0	0.0	0.0	0.0	0.0	0.003652781149517339	0.0	0.0	0.0	0.0	0.0
11200148	0.0	0.0		0.0	0.0	0.0	0.0	0.0	0.002438611628677143	0.0	0.0	0.0	0.0	0.0
11200192	0.0	0.0		0.0	0.0	0.0	0.0	0.0	0.0019689649748883624	0.0	0.0	0.0	0.0	0.0
11200170	0.00180039849357	0.0		0.0	0.0	0.0	0.0	0.0	0.001990775401661649	0.0	0.0	0.0	0.0	0.0
11227814	0.014407518617700003	0.0		0.0	0.0	0.0	0.0	0.0	0.014407518617700003	0.0	0.0	0.0	0.014244064972938078	0.0
11208410	0.00494835227149	0.0		0.5176206148899999	0.0	0.000191021967526	0.0	0.0	0.00494835227149	0.0	0.005253420618829999	3.1153281659065004	0.0002514078841510711	0.0010293638196465485
11207514	0.0245913724853	0.006628708440989999	0.00939891495364	0.00949785090052	0.0	0.845070422535	0.0	0.9783744547567924	0.0422331469332626	0.006628708440989999	0.00939891495364	0.00949785090052	0.9731159100928386	0.9966165409601856
11203158	0.050521090369100005	0.0		0.00115247203212	0.0	0.0	0.0	0.0	0.01630577241246297	0.0	0.0	0.00516307470389	0.0	0.0
11203238	0.041609637870499996	0.0		0.00281203175837	0.0	0.0	0.0	0.0	0.041609637870499996	0.0	0.0	0.018716145801560002	0.0	0.0
11203162	0.023980768433400003	0.0		0.00401060267177	0.0	0.0	0.0	0.0	0.01726727099146966	0.0	0.0	0.00401060267177	0.0	0.0
11204664	0.0007461782985870001	0.0		0.023971418268	0.0	0.0	0.0	0.0	0.007683340325219253	0.0	0.0	0.075463868663	0.020531593187993472	0.0
11203308	0.012428902226	0.0		0.0	0.0	0.0	0.0	0.0	0.013898085605359815	0.0	0.0	0.0	0.0109550841549752	0.0
11202728	1.0	0.0	0.0	0.0	0.0	1.0	0.0	1.0	0.9992015599825796	0.0	0.0	0.0	1.0	1.0
11202570	1.0	0.0	0.0	0.0	0.0	0.960863697706	0.0	1.0	1.0	0.0	0.0	0.0	0.6731247778173121	1.0
11202730	1.0	0.0	0.0	0.0	0.0	0.846510492923	0.0	1.0	0.9993792719911476	0.0	0.0	0.0	0.8739542665919975	1.0
11202482	1.0	0.0	0.0	0.0	0.0	0.568181818182	0.0	1.0	1.0	0.0	0.0	0.0	0.7321877619448763	1.0
11204612	0.0158401542876	0.0		0.0	0.0	0.0	0.0	0.0	0.01386137708484752	0.0	0.0	0.0	0.008936550491518888	0.0
11203340	0.0114434901877	0.0		0.0	0.0	0.016060738794	0.0	0.0	0.011516613202779134	0.0	0.0	0.0	0.011652542372889185	0.0
11203326	0.0	0.0		0.0	0.0	0.0	0.0	0.0	0.011673511551863408	0.0	0.0	0.0	0.015618344455502768	0.0
11207374	0.122262020636	0.0	0.0	0.0	0.0	0.320362674726	0.0	0.29478022652688746	0.32215976319395034	0.005740036256609999	0.00466986000538	0.005740036256609999	0.19197007861989854	0.17875202654470534
11208424	0.00339487618058	0.0		1.3601344943	0.0	0.0	0.0	0.0	0.004031865867735468	0.0	0.005253420618829999	2.5977075510165	0.0002729816419844327	0.0013971192005139256
11203484	0.0118274469599	0.0		0.017978563701	0.0	0.0	0.0	0.0	0.0118274469599	0.0	0.0	0.0902155106741	0.0	0.0
11203302	0.0	0.0		0.0	0.0	0.020233463035	0.0	0.0	0.0	0.0	0.0	0.0	0.008124076809456557	0.0
11207470	0.0106220223059	0.0		0.0682784533565	0.0	0.0	0.0	0.0	0.001437626819984254	0.00337719896925	0.01388404020691	1.2784746886774	0.016024036054057826	0.034579063673374225
11207618	0.0036387672323200003	0.0	0.005253420618829999	1.16929460336	0.0	0.000579038795599	0.0	0.0029635187673900626	0.003086095810488952	0.04127687629085	0.12458111753211001	2.6164633064158	0.02303688116072424	0.06371890649871331
11208418	1.0	0.0	0.0	0.0	0.0	1.0	0.0	1.0	0.8442770049397631	0.00715072313324	0.00715072313324	0.00715072313324	1.0	1.0
11202710	1.0	0.0	0.0	0.0	0.0	1.0	0.0	1.0	1.0	0.0	0.0	0.0	0.973670069854863	1.0
11202704	1.0	0.0	0.0	0.0	0.0	1.0	0.0	1.0	1.0	0.0	0.0	0.0	0.9481792717087488	1.0
11207148	1.0	0.00301595125347	0.00301595125347	0.00301595125347	0.0	1.0	0.0	1.0	1.0	0.11737887701017	0.11767074326047	0.11767074326047	0.9975639464069768	1.0
11207174	1.0	0.00374561687931	0.00374561687931	0.00374561687931	0.0	1.0	0.0	1.0	1.0	0.12112449388947999	0.12141636013978	0.12141636013978	0.9976377952757416	1.0
11218596	1.0	0.0	0.0	0.0	0.0	1.0	0.0	1.0	0.8359057194126631	0.00715072313324	0.00715072313324	0.00715072313324	1.0	1.0
11207344	1.0	0.0	0.0	0.0	0.0	1.0	0.0	1.0	0.8366226796773811	0.00851276563481	0.00851276563481	0.00851276563481	1.0	1.0
11203524	0.0	0.0		0.0226345507108	0.0	0.0	0.0	0.0	0.005930214926144386	0.0	0.0	0.05937535909468	0.01976869284563226	0.0
11205418	0.0	0.0	0.0	0.0	0.0	0.8545454545450001	0.0	0.4073407428100602	0.0	0.0	0.0	0.0	0.08613861386147666	0.17593675730597544
11205414	0.0	0.0	0.0	0.0	0.0	0.831578947368	0.0	0.6822412911017955	0.0002685257706464691	0.0	0.0	0.0	0.10326481257565312	0.18756890499898696
11203296	0.0	0.0		0.0	0.0	0.00204918032787	0.0	0.0	0.0	0.0	0.0	0.0	0.005287146763909916	0.0
11205432	0.0	0.0	0.0	0.0	0.0	0.21095890411	0.0	0.14694068551120812	0.0	0.0	0.0	0.0	0.07553324968642176	0.17274297582473966
11207750	0.0423458323924	0.0132112932661	0.241256572146	7.826907589939999	0.0	0.0149133705494	0.0	0.07940226004532405	0.0423458323924	1.6651756561170894	0.61121471993764	11.13900824833752	0.01825166481922764	0.08214145865798142
11200238	0.00016608100668700002	0.0		0.134339075986	0.0	0.00105065666041	0.0	0.0	0.00017023857390348568	0.0	0.0	0.137324698188686	0.004865884070311323	0.0
11199974	0.0121468375593	0.0		0.013742442301	0.0	0.00014929829799899998	0.0	0.0	0.009425373442297044	0.000164242577739	0.0	0.032954830745481	0.00039698292973390254	0.0
11198120	0.006479911182819999	0.000164242577739		0.0155635750853	0.0	0.00091407678245	0.0	0.0	0.0047283794123762395	0.129094666102739	0.0	1.3257266177053002	0.05559308295052763	0.0
11203592	0.0270838748276	0.007855973672119999		0.182651387877	0.0	0.0154320987654	0.0	0.0	0.07834405895799129	0.007855973672119999	0.0	1.097217656207	0.01598894591392894	0.0
11200196	0.00026308919015200004	0.0		0.0	0.0	0.0	0.0	0.0	0.001803545066605921	0.0	0.0	0.0	0.0	0.0
11200230	0.0013313847157	0.0		0.0	0.0	0.0	0.0	0.0	0.0006947932383106608	0.0	0.0	0.0	0.0	0.0
11200250	0.00072127453589	0.0		0.0	0.0	0.0	0.0	0.0	0.0010834091031552912	0.0	0.0	0.0	0.0	0.0
11200268	0.0	0.0		0.0	0.0	0.0	0.0	0.0	0.0006307158937346818	0.0	0.0	0.0	0.0	0.0
11200288	0.0	0.0		0.0	0.0	0.0	0.0	0.0	0.0	0.0	0.0	0.0	0.0	0.0
11202638	1.0	0.0	0.0	0.0	0.0	0.957345971564	0.0	1.0	1.0	0.0	0.0	0.0	0.9332732191164048	1.0
11207212	1.0	0.0213062362745	0.0213062362745	0.0213062362745	0.0	1.0	0.0	1.0	1.0	0.07549607008687	0.07549607008687	0.07549607008687	1.0	1.0
11208416	1.0	0.0	0.0	0.0	0.0	1.0	0.0	1.0	0.9952087270278688	0.00715072313324	0.00715072313324	0.00715072313324	1.0	1.0
11207356	0.973253306623	0.120443472639	0.12141636014	0.12141636014	0.0	0.991987179487	0.0	1.0	0.5612936604003878	0.179254522081696	0.180227409582696	0.180227409582696	0.9946794360200988	1.0
11202654	1.0	0.0	0.0	0.0	0.0	1.0	0.0	1.0	1.0	0.0	0.0	0.0	0.935708079930576	1.0
11202656	1.00000000079	0.0	0.0	0.0	0.0	0.8586613042229999	0.0	0.999953992479462	1.0000000003342504	0.0	0.0	0.0	0.8702811244980699	0.9999614091134958
11207460	0.257205574489	0.0	0.0	0.0	0.0	1.0	0.0	1.0	0.257205574489	0.0155329436602	0.0185999580135	0.0185999580135	0.9152337127635352	1.0
11210120	0.0988450323822	0.0		0.0	0.0	0.0	0.0	0.0	0.01435660485265061	0.0	0.0	0.0	7.739938080487618e-05	0.0
11203576	0.0	0.0		0.19116202602200005	0.0	0.0	0.0	0.0	0.017873028038584718	0.0	0.0	0.9145662683299999	0.0164403145103777	0.0
11203568	0.0	0.0		0.515875604469	0.0	0.0	0.0	0.0	0.0	0.0	0.0	0.723404242308	0.0196731234866882	0.0
11207696	0.006217852033600001	0.000202695853659	0.0042566129268400005	0.04520117536590002	0.0	0.0016286644951099998	0.0	0.019926119769833533	0.006217852033600001	0.05417086773375899	0.16246772833983994	1.9213114941249	0.03214119832793105	0.07888573625313633
11207472	0.0	0.0		0.035435909856500004	0.0	0.0	0.0	0.0	0.006295185711679649	0.00337719896925	0.01388404020691	1.2456321451774	0.0153238357476133	0.033068066637485134
11207730	0.00534183882534	0.0		0.155782352624	0.0	0.0	0.0	0.0	0.002292158053825993	0.00101347926829	0.00842967607605	1.020246132844	0.006080839394298247	0.0070358013520154606
11207748	0.00528996291957	0.0		0.000920677937756	0.0	0.0	0.0	0.0	0.0039000838865623478	0.0	0.0	0.931153218427756	0.0	0.0
11207554	0.00581263390641	0.0		0.278451638296	0.0	0.0	0.0	7.30377621798008e-07	0.005812633906409999	0.01773356755435	0.09704336042339999	0.8138659049430002	0.031488191928057636	0.09202528378580124
11208446	0.000702894485859	0.0		0.234152514022	0.0	0.0	0.0	9.930702616907624e-05	0.000702894485859	0.05029833565641997	0.09565845063479997	1.8681116281974	0.056122448979528936	0.09590962171441364
11207410	0.0072923403681199985	0.0		0.530493679122	0.0	0.0	0.0	0.0	0.0072923403681199985	0.0	0.005253420618829999	1.7352241923385	0.0003592276605296715	0.001838526057039116
11207612	0.13984588393	0.0007504886598330001	0.0007504886598330001	0.00412768762908	0.0	0.044776119403	0.0	0.03658691785090405	0.03318069033671692	0.017261239176166003	0.059288604126733	1.67259814781463	0.02204273935725197	0.05267259146665948
11207570	0.00491522467734	0.00126568926498	0.00253137852997	0.0316422316246	0.0	0.0123456790123	0.0	0.02851777252081712	0.003262114542875007	0.03048403971482	0.0641099903441	0.23512609908360002	0.16016350798952864	0.31594054058879745
11202698	1.0	0.0	0.0	0.0	0.0	0.456140350877	0.0	0.2847313422458233	0.38434138118457306	0.0	0.0	0.0	0.9901524777636559	0.986212510352634
11202686	1.0	0.0	0.0	0.0	0.0	0.978947368421	0.0	0.9601579927591584	0.3778964700234199	0.0	0.0	0.0	0.9895146794487656	0.9847294790935684
11202648	1.0	0.0	0.0	0.0	0.0	1.0	0.0	1.0	1.0	0.0	0.0	0.0	0.8388489208633964	1.0
11202608	1.0	0.0	0.0	0.0	0.0	0.980198019802	0.0	1.0	0.7029651106313458	0.0	0.0	0.0	0.8415094339620814	1.0
11202574	1.0	0.0	0.0	0.0	0.0	0.946058091286	0.0	1.0	0.7112160797804751	0.0	0.0	0.0	0.8047276464543184	1.0
11204558	1.0	0.0	0.0	0.0	0.0	0.566986265872	0.0	1.0	1.0	0.002678552164075	0.002678552164075	0.002678552164075	0.6354916067146115	1.0
11204556	1.0	0.0	0.0	0.0	0.0	0.875080076874	0.0	1.0	1.0	0.014414578868158997	0.013293555184658995	0.014414578868158997	0.949884939913114	0.970281059630954
11208428	0.000507395608144	0.0		0.950532638002	0.0	0.0	0.0	0.0	0.000507395608144	0.0	0.005253420618829999	2.1881056947185	0.0004336513443189389	0.002219426240799062
11207138	1.0	0.0148365343921	0.0148365343921	0.0148365343921	0.0	1.0	0.0	1.0	1.0	0.06834534695369	0.06834534695369	0.06834534695369	1.0	1.0
11208412	1.0	0.0	0.0	0.0	0.0	1.0	0.0	1.0	1.0	0.0912568476052	0.0900893826038	0.12302162451680004	0.7930069930068611	0.7841464490314455
11207116	1.0	0.00184848625213	0.00184848625213	0.00184848625213	0.0	1.0	0.0	1.0	1.0	0.11436292575669996	0.114654792007	0.114654792007	0.9975010412329796	1.0
11207104	1.0	0.00233493000269	0.00233493000269	0.00233493000269	0.0	1.0	0.0	1.0	1.0	0.11669785575938996	0.11698972200968999	0.11698972200968999	0.9975500204166532	1.0
11207088	1.0	0.00593461375684	0.00593461375684	0.00593461375684	0.0	1.0	0.0	1.0	1.0	0.11421699263154	0.11450885888184	0.11450885888184	0.9974704890389476	1.0
11207006	0.38146150512500004	0.01298804814	0.01298804814	0.01298804814	0.0	1.0	0.0	0.9999958349690244	0.7834087369111045	0.8308105627078001	0.28446030104540004	5.289482204710398	0.4557786218122322	0.38990657960899655
11200014	0.0007104111700119999	0.0		0.0099847933343	0.0	0.0	0.0	0.0	0.0007104111700119999	4.94611231261e-05	0.0	1.30020226865261	0.00017220595832621318	0.0
11200008	0.0167213972442	0.0		0.0255140303088	0.0	0.0	0.0	0.0	0.0167213972442	4.94611231261e-05	0.0	1.31803125282407	0.00017663163472583592	0.0
946040294	0.0135369441943	0.25697461143100003		1.24326672032	0.0	0.12903225806500002	0.0	0.0	0.0006945214104835786	0.25697461143100003	0.0	1.24326672032	0.12903225806500002	0.0
946040293	0.0	0.0173761937767		0.157471756102	0.0	0.0110486528397	0.0	0.0	0.0	0.27435080520770005	0.0	1.400738476422	0.017101875689618847	0.0
11198430	0.268765627131	0.047784532885999986		2.11229355598	0.0	0.289388689882	0.0	0.0	0.268765627131	0.07234784828688999	0.000496028178532	2.14016041904989	0.3867191295055688	0.0023619361614369725
11198412	0.055320244597300006	0.0		0.0	0.0	0.06748794858059999	0.0	0.0	0.05345905624387118	0.000892850721357	0.0	0.0107737320377	0.04737061769618293	4.009631634458449e-05
11198376	0.0	0.0		0.0	0.0	0.830769230769	0.0	0.0	0.0	0.0	0.0	0.0	0.093167701863336	0.0
11198454	0.889567491925	0.00286704287191	0.00286704287191	0.00286704287191	0.0	1.0	0.0	1.0	0.0532719158104492	0.00991064300707	0.00991064300707	0.00991064300707	0.7213342599028881	0.7276863528080336
11198444	1.0	0.0101288954056	0.0102876244227	0.0102876244227	0.0	0.984570877531	0.0	1.0	0.0675338728169287	0.0128570503875193	0.0130157794046193	0.0130157794046193	0.620874471086057	0.5901667665093715
11207430	1.0	0.0	0.0	0.0	0.0	1.0	0.0	1.0	0.8379851076129492	0.005740036256609999	0.00466986000538	0.005740036256609999	0.24216462422729065	0.2380722026384169
11207304	1.0	0.0	0.0	0.0	0.0	1.0	0.0	1.0	1.0	0.005740036256609999	0.00466986000538	0.005740036256609999	0.1328949001116574	0.12821240607132925
11207260	1.0	0.0	0.0	0.0	0.0	1.0	0.0	1.0	1.0	0.005740036256609999	0.00466986000538	0.005740036256609999	0.13106192489428584	0.12636953252037336
11208454	0.00358263247436	0.0		0.57504813683	0.0	0.0	0.0	0.0	0.0024602300118812593	0.006266899887119999	0.01982696224878	0.9726376067839	0.0373579385618855	0.062355407393767236
11207218	0.8638129693809999	0.0	0.0	0.0	0.0	1.0	0.0	1.0	0.943517457105619	0.08396019134680001	0.0827927263454	0.11572496825840001	0.7511768661733449	0.7405257415223327
11208396	0.534029048691	0.0239330325276	0.0231547225267	0.0545789888129	0.0	0.422297297297	0.0	0.4058971897767051	0.6059527754250177	0.7994349407965999	0.2534738341347	5.2569877621729	0.4064516129032102	0.3354313611831544
11206882	1.0	0.0	0.0	0.0	0.0	0.916666666667	0.0	0.7794474435769854	0.4158589078055647	6.97702414788	3.11804765381	26.7571714159	0.2187057961382141	0.14578979511995413
11204632	0.000291506779862	0.0		0.0288578996842	0.0	0.0394978567055	0.0	0.0	0.0002032147583840537	0.0	0.0	0.03674080838388	0.04048192771087317	0.0
11203482	0.00030419815597000003	0.0		0.00788290869968	0.0	0.00216684723727	0.0	0.0	0.0004052412880604813	0.0	0.0	0.00788290869968	0.04692307692306681	0.0
11206198	0.0	0.0		0.0	0.0	0.0	0.0	0.0	0.0	0.0	0.0	0.04997039886803	0.0	0.0
11206254	0.000552939680385	0.0		0.0387404281355	0.0	0.0	0.0	0.0	0.0002563961224227475	0.0	0.0	0.08627469578642999	0.0	0.0
11206272	0.000202152780732	0.0		0.00374332357751	0.0	0.0	0.0	0.0	0.00025218545206319177	0.0	0.0	0.07938222697703	0.015410668924637681	0.0
11206308	0.0010229944270700002	0.0		0.00338681657013	0.0	0.0	0.0	0.0	0.0008799714054454602	0.0	0.0	0.07415345753542997	0.04500090727635955	0.0
11206282	0.0131896325929	0.0		0.0014854458640899998	0.0	0.0	0.0	0.0	0.0008458876444106259	0.0	0.0	0.07563890339952001	0.016867469879515387	0.0
11209976	0.0066987521054	0.0		0.0	0.0	0.0	0.0	0.0	0.0066987521054	0.0	0.0	0.0171251864813	0.001902263037061523	0.010510361546809392
11209944	0.00134141551767	0.0	0.0	0.0171251864813	0.0	0.00717999504828	0.0	0.039670824902478134	0.00527938296943139	0.1362126661407	1.0607160882293	20.4616866348913	0.025094706879582474	0.12112953672734005
11206728	0.00920267683148	1.5294117704	0.0	2.00000000745	0.0	0.644	0.0	0.2551089303629617	0.00920267683148	1.5294117704	0.0	2.00000000745	0.4590060809392854	0.6485626113056538
11206628	0.00985062500282	0.0	0.0	0.0	0.0	0.288926601612	0.0	1.0	0.009210305305614749	0.0	0.0	0.0	0.646832521159401	0.9653282115937072
11206592	0.675730409063	0.0	0.0	0.0	0.0	1.0	0.0	1.0	0.5116925627174469	0.0	0.0	0.0	0.9960686474637448	0.9988378600903539
11208382	1.0	6.57848998508	6.59839665238	6.59839665238	0.0	0.998334721066	0.0	1.0	0.5560202406868597	8.718456719183001	8.999804283609	8.999804283609	0.5283319705644209	0.5187280713754883
11206880	1.0	0.134038226446	0.136028893176	0.136028893176	0.0	0.996972754793	0.0	1.0	1.0	0.8798746943940001	0.8938093615	0.8938093615	0.2600124033034699	0.2315232317684135
11206832	1.0	0.0464488903526	0.0464488903526	0.0464488903526	0.0	0.9980634229	0.0	1.0	1.0	0.9263235847466	0.9402582518526	0.9402582518526	0.3477047860103632	0.3228306848737024
11207338	0.0211852878106	16.3074100868	6.22879619629	562.941205276	0.0	0.0524144663927	0.0	0.03762864356773269	0.027884565682820824	18.494102315129066	8.12391092267506	615.3240315641341	0.06315943502301154	0.047211944038402974
11207324	1.0	0.008626222494059999	0.008626222494059999	0.008626222494059999	0.0	1.0	0.0	1.0	0.021236197579422064	2.1866922283290604	1.8951147263850605	52.38282628813406	0.33828501178178544	0.2925929367579088
11207320	0.313227264129	1.3366707801100002	1.19572714879	45.3386927132	0.0	0.327084680026	0.0	0.2909328462077752	0.02829053175011838	2.27361415621202	1.97075620946812	52.56198244114602	0.3434825870648684	0.2973488965732316
11207290	0.660600073068	1.16520359227	1.12671736884	1.23885826126	0.0	0.940546331012	0.0	0.9093986071479632	0.6921474001645873	1.7630671666658997	1.7391791659179	1.8513200583379	0.9525169582290456	0.939609853461352
11208368	0.00400303980265	0.0		0.0	0.0	0.0	0.0	0.0	0.00400303980265	0.0	0.0	0.0	0.0	0.0
11206414	0.0	0.0		0.0	0.0	0.0	0.0	0.0	0.0009709671969910334	0.0	0.0	0.0	0.0	0.0
11206364	0.0	0.0		0.0	0.0	0.0	0.0	0.0	0.0	0.0	0.0	0.0	0.0	0.0
11206336	0.0	0.0		0.0	0.0	0.0	0.0	0.0	0.003556588501141783	0.0	0.0	0.0	0.0	0.0
11206284	0.0	0.0		0.0	0.0	0.0	0.0	0.0	0.003324643863526726	0.0	0.0	0.0	0.0	0.0
11206276	0.0	0.0		0.0	0.0	0.0	0.0	0.0	0.0	0.0	0.0	0.0	0.0	0.0
11206128	0.0	0.0		0.0	0.0	0.0	0.0	0.0	0.0	0.0	0.0	0.0	0.0	0.0
11206104	0.0	0.0		0.0	0.0	0.0	0.0	0.0	0.0	0.0	0.0	0.0	0.0012263251124139311	0.0
11207238	0.5511466580650001	0.523545349832	0.435956013738	0.523545349832	0.0	1.0	0.0	0.8335927438856491	0.7261144472749269	2.100153399511	1.988676062669	2.188406291183	0.9598065880929456	0.9092027423605392
11207200	0.5558491916170001	0.038486223435	0.038486223435	0.038486223435	0.0	1.0	0.0	1.0	0.8721986649327387	1.727235165537	1.6011596060130002	1.800889834527	0.9591009579953588	0.8892969323769434
11207184	0.881510143258	0.224945340422	0.203711561975	0.28134756442200004	0.0	0.7995283018870001	0.0	0.7268201634602566	0.8928844253073868	1.952180505959	1.8048711679880003	2.082237398949	0.9375398342891944	0.8673434110191757
11207194	0.9954738271879999	4.59379525587	4.85656326415	4.85656326415	0.0	0.946100449163	0.0	1.0	0.9954738271879999	4.833338818974199	5.096106827254199	5.096106827254199	0.9486248053970632	1.0
11207098	0.892116107244	0.167879560846	0.218973340234	0.275375564233	0.0	0.609638554217	0.0	0.7938641233802627	0.1472799660504682	2.3390334070433005	2.4252956319831003	2.4816978559821	0.94251336898393	0.9771266340114464
11208386	1.0	1.54608449317	1.75709516648	1.75709516648	0.0	0.8799093655589999	0.0	1.0	1.0	3.07823431923	3.53874188929	3.53874188929	0.8705223880595463	1.0
11206064	0.0	0.0		0.0	0.0	0.0	0.0	0.0	0.0	0.0	0.0	0.0	0.00170551449687433	0.0
11206046	0.0	0.0		0.0	0.0	0.0	0.0	0.0	0.0	0.0	0.0	0.0	0.0018192844147980267	0.0
11206014	0.0	0.0		0.0	0.0	0.0	0.0	0.0	0.0	0.0	0.0	0.0	0.0022376926902053307	0.0
11206008	0.0	0.0		0.0	0.0	0.0	0.0	0.0	0.0	0.0	0.0	0.0	0.0030030030030049515	0.0
11206006	0.0	0.0		0.0	0.0	0.0	0.0	0.0	0.0	0.0	0.0	0.0	0.0020197486535022077	0.0
11206000	0.0	0.0		0.0	0.0	0.00534441805226	0.0	0.0	0.0	0.0	0.0	0.0	0.0019767186470471864	0.0
11205964	0.0	0.0		0.0	0.0	0.0	0.0	0.0	0.0	0.0	0.0	0.0	0.0	0.0
11205962	0.00751164193129	0.0		0.0	0.0	0.0	0.0	0.0	0.00023302267994715077	0.0	0.0	0.0	0.0	0.0
11205950	0.018953485053799998	0.0		0.0	0.0	0.0	0.0	0.0	0.00099827771621778	0.0	0.0	0.0	0.0	0.0
11207770	0.0017737779016999999	0.00011188685675700005		0.89636038095	0.0	0.000542888165038	0.0	0.0	0.0017737779016999999	0.00011188685675700005	0.0	1.005897613715	0.0006598284446042285	0.0006949365575084825
11206778	0.8268038009980001	0.005515963168359999	0.005515963168359999	0.005515963168359999	0.0	1.0	0.0	1.0	0.9079949988277328	0.43459878846774297	0.442071810237618	2.8072731830610294	0.2659702691840874	0.2723367758689785
11207286	1.0	0.101524003199	0.101524003199	0.101524003199	0.0	1.0	0.0	1.0	1.0	1.03846737930102	0.8765530638771202	7.32481373114502	0.3937733499379925	0.3340134391599663
11207110	1.0	0.009289778070520002	0.009289778070520002	0.009289778070520002	0.0	1.0	0.0	0.9999439470262802	0.9644723620202552	0.3841619399517345	0.3320769609564178	0.4094564963567346	0.9937259375445936	0.7676127267002625
11207106	1.0	0.0530497724103	0.0530497724103	0.0530497724103	0.0	1.0	0.0	1.0	0.9664279306363258	1.0926244835065144	1.0451843935464975	1.0927039280055144	0.9995929167514812	0.8928973230341138
11208406	1.0	0.744623172541	0.744623172541	0.744623172541	0.0	1.0	0.0	1.0	0.9889893923790924	1.0395747110962146	0.9921346211361975	1.0396541555952146	0.9995858641634512	0.8910418031612234
11206764	0.730893357795	0.000812696767753	0.000812696767753	0.000812696767753	0.0	1.0	0.0	1.0	0.730893357795	0.435411485235496	0.442884507005371	2.8080858798287824	0.2671235166301294	0.27348002078070033
11206762	0.9999943784950001	0.00643240845966	0.00643240845966	0.00643240845966	0.0	1.0	0.0	1.0	0.9999943784950001	0.441031196927403	0.44850421869727797	2.813705591520689	0.27499999999967994	0.2812881885467808
11205932	0.0	0.0		0.0	0.0	0.0	0.0	0.0	0.0023228448383669623	0.15658099215933	0.364547740392056	0.36786253931116	0.010540184453222398	0.01585778794368553
11205872	0.0	0.0		0.0	0.0	0.0	0.0	0.0	0.0016108578251490054	2.58171953679933	3.3936112631520565	5.137649042741161	0.07512764405550226	0.0894458720917537
11205848	0.0	0.0		0.0	0.0	0.0	0.0	0.0	0.0	2.58171953679933	3.3936112631520565	5.137649042741161	0.08032232908767373	0.09563058796812658
11205836	0.0	0.0		0.0	0.0	0.0	0.0	0.0	0.00017041019178607418	2.6406344195123297	3.4511234105623565	5.348860901175161	0.1270275963766334	0.13836391319485822
11205784	4.02197253136e-06	0.0006059309853300001	0.000534644987056	0.00342172791716	0.0	0.0299251870324	0.0	0.0191212146378589	1.3038083953721585e-06	2.6769051466247995	3.514246499183436	5.6308106970163605	0.174921909861576	0.21678335082153868
11205832	0.0	0.00861680257367	0.00721406727098	0.0935824837652	0.0	0.0920770877944	0.0	0.077729570535039	0.0065054931893757965	0.05610941210767	0.31020489265208	0.9937377665782	0.05646299657181447	0.3113269553727749
11205878	0.0	0.0198386849952	0.247081804031	0.711787970737	0.0	0.0278716216216	0.0	0.3460193944953397	0.0177201953795698	0.022042983328	0.385952598997	0.9256049090189999	0.018103172060223608	0.3084878665336586
11202844	0.0	0.0022042983328	0.138870794966	0.213816938282	0.0	0.00520446096654	0.0	0.2589295069351861	0.0	0.0022042983328	0.138870794966	0.213816938282	0.00520446096654	0.2589295069351861
11205684	0.0034423300796300005	0.0		0.0	0.0	0.0	0.0	0.0	0.0034423300796300013	0.0	0.0	0.0	0.044407667907896985	0.0
11205608	0.00839705024647	0.0		0.0	0.0	0.0	0.0	0.0	0.0053631292940960786	0.0	0.0	0.0	0.0896729143697774	0.0
11206694	1.0	0.0020615704816	0.0020615704816	0.0020615704816	0.0	1.0	0.0	1.0	0.998524562803048	0.017011686675690002	0.017011686675690002	0.017011686675690002	1.0	1.0
11206676	1.0	0.007722927606659998	0.007722927606659998	0.007722927606659998	0.0	1.0	0.0	1.0	0.9985669958758604	3.4671407161106766	3.4671407161106766	3.4671407161106766	1.0	1.0
11208462	0.00400976298371	0.0	0.0	1.19433680725	0.0	0.0	0.0	0.0016077967795547572	0.00400976298371	0.0378996773216	0.1106970773252	2.6006038783449	0.014513202983296941	0.044839276251772565
11207708	0.0009695020996930001	0.00101347926829	0.00842967607605	0.28941564339000003	0.0	0.0178884601894	0.0	0.020697743226711213	0.002316074808871988	0.02840631535222	0.07198592410707999	0.4655086936688	0.0897460018814187	0.17256632720747167
11206458	0.0	0.0		5.94178345636e-05	0.0	0.0	0.0	0.0	0.0	0.0	0.0	0.0448604650955272	0.0	0.0
11206554	0.0731321548892	0.0	0.0	0.0	0.0	1.0	0.0	1.0	0.0266556947611026	0.0	0.0	0.0	1.0	1.0
11206532	0.0	0.0	0.0	0.0	0.0	1.0	0.0	1.0	0.026241935602193744	0.0	0.0	0.0	1.0	1.0
11206516	0.042189541175	0.0	0.0	0.0	0.0	0.997647058824	0.0	1.0	0.026365025655627337	0.0	0.0	0.0	0.9995541685243868	1.0
11206482	0.0	0.0	0.0	0.0	0.0	0.08609599208310001	0.0	0.161274392082288	0.013197762770361313	0.0	0.0	0.0	0.4237425635478481	0.5407876952667969
11205554	0.00741101779003	0.0		0.0	0.0	0.0	0.0	0.0	0.005019455339682397	0.0	0.0	0.0	0.10768912773879984	0.0
11205492	0.10161991423000001	0.0		0.0	0.0	0.105263157895	0.0	0.0	0.016761336602365215	0.0	0.0	0.0	0.10259052104802804	0.0
11205528	0.037008766541499996	0.0		0.0	0.0	0.119023397762	0.0	0.0	0.01439376982567643	0.0	0.0	0.0	0.10466760961814947	0.0
11205546	0.0059208250474	0.0		0.0	0.0	0.183229813665	0.0	0.0	0.011794010525985802	0.0	0.0	0.0	0.10968421052638183	0.0
11205474	0.0193484601696	0.0		0.0	0.0	0.0682080924855	0.0	0.0	0.017149517328411714	0.0	0.0	0.0	0.10248161764709443	0.0
11205446	0.0	0.0		0.0	0.0	0.0583804143126	0.0	0.0	0.025673630109132088	0.0	0.0	0.0	0.11483951646526	0.0
11205430	0.0	0.0		0.0	0.0	0.260869565217	0.0	0.0	0.024461828746607826	0.0	0.0	0.0	0.12186547925950947	0.0
11205412	0.0	0.0		0.0	0.0	0.135174418605	0.0	0.0	0.029071262918330083	0.0	0.0	0.0	0.11641500243555525	0.0
11206472	0.0	0.0	0.0	0.0	0.0	0.726384364821	0.0	0.7632151146289581	0.01517684985596055	0.0	0.0	0.0	0.8152709359606236	0.9626622615218724
11206402	0.0	0.0	0.0	0.0	0.0	0.029520295203	0.0	0.17286009986385306	0.015595738007158959	0.0	0.0	0.0	0.20270270270265148	0.3339147554260981
11206386	0.0	0.0	0.0	0.0	0.0	0.0	0.0	0.17712538704423844	0.015985200318248162	0.0	0.0	0.0	0.0662782228696133	0.1650384410704634
11205634	0.0	0.0		0.0	0.0	0.0	0.0	0.0	0.0	0.0	0.0	0.0	0.05753514220339195	0.0
11205632	0.005102790269590001	0.0		0.0	0.0	0.0	0.0	0.0	0.005102790269590001	0.0	0.0	0.0	0.046230627790957705	0.0
11205630	0.0	0.0		0.0	0.0	0.0	0.0	0.0	0.004574717485785412	0.0	0.0	0.0	0.05847176079740065	0.0
11205620	0.038443421186099995	0.0		0.0	0.0	0.0	0.0	0.0	0.038443421186099995	0.0	0.0	0.0	0.05872539205878411	0.0
11205612	0.0	0.0		0.0	0.0	0.0	0.0	0.0	0.01943304001706848	0.0	0.0	0.0	0.05925925925931851	0.0
11205610	0.017583523059700002	0.0		0.0	0.0	0.0	0.0	0.0	0.017583523059700002	0.0	0.0	0.0	0.0547263681592587	0.0
11205376	0.0	0.0		0.0	0.0	0.0777777777778	0.0	0.0	0.0	0.0	0.0	0.0	0.1242990654205833	0.0205265215325614
11205362	0.0	0.0		0.0	0.0	0.0464135021097	0.0	0.0	0.0	0.0	0.0	0.0	0.1263414634146567	0.02142768589252751
11205344	0.0	0.0		0.0	0.0	0.214285714286	0.0	0.0	0.003266092802563959	0.0	0.0	0.0	0.1439146527325046	0.042482084167765014
11205398	0.00032885305804799994	0.0		0.0	0.0	0.109102646869	0.0	0.0	0.0015869468105053168	0.0	0.0	0.0	0.10275721215221856	0.09908530390872483
11205404	0.0	0.0		0.0	0.0	0.0665557404326	0.0	0.001059648336337602	0.00027542221514806814	0.0	0.0	0.0	0.09860641891898614	0.1639008173186128
11203218	1.0	0.0189103423618	0.0189103423618	0.0189103423618	0.0	1.0	0.0	1.0	1.0	0.055086649488699985	0.0669056134648	0.0669056134648	0.8335745296669508	1.0
11203322	1.0	0.0122300583753	0.0122300583753	0.0122300583753	0.0	1.0	0.0	1.0	0.0702897629286597	0.0672139342642	0.07368867105110001	0.07368867105110001	0.9014267185472192	1.0
11203266	1.0	0.0374095903244	0.0374095903244	0.0374095903244	0.0	1.0	0.0	1.0	1.0	0.33935842651457204	0.35045797529215195	0.36011869367195204	0.9491610318059904	0.9762806116657412
11203312	1.0	0.000822188798338	0.000822188798338	0.000822188798338	0.0	1.0	0.0	1.0	0.0706943893973333	2.1252943532933384	0.651026854408338	2.1447917183433383	0.9779425058763908	0.4272375357204302
11206142	0.158502141111	0.0	0.0	0.0	0.0	0.422243166824	0.0	0.4920504736125549	0.158502141111	0.0	0.0	0.16488449091399998	0.2156756181992564	0.13914383360258742
11203616	0.0	0.0		0.0	0.0	0.0	0.0	0.0	0.0	0.00981996709015	0.0	0.8916530117860301	0.06686478454679773	0.0
11203556	0.0	0.0		0.0871268856281	0.0	0.0	0.0	0.0	0.006401874880995175	0.0	0.0	0.4886301094080999	0.0	0.0
11203518	0.011614360164	0.0		0.000276593287708	0.0	0.0	0.0	0.0	0.011614360164	0.0	0.0	0.16830701557050798	0.0	0.0
11203416	1.0	0.00328875519335	0.00328875519335	0.00328875519335	0.0	1.0	0.0	1.0	1.0	0.09814878780165	0.07081101025685001	0.09814878780165	1.0	0.8076055409085444
11203190	1.0	0.293624174607	0.30451817618500004	0.31407612096500004	0.0	0.942379717661	0.0	0.9731118317661236	1.0	0.3037987609864	0.314898309764	0.3244562545440001	0.4360059026072448	0.5214481768223082
11203314	1.0	0.00770801998442	0.00770801998442	0.00770801998442	0.0	1.0	0.0	1.0	0.07351694299399172	0.054983875888900004	0.061458612675800016	0.061458612675800016	0.8814352574101497	1.0
11203300	1.0	0.00452203839086	0.00452203839086	0.00452203839086	0.0	1.0	0.0	1.0	0.07544251938439174	0.04727585590448	0.053750592691380016	0.053750592691380016	0.8645276292333439	1.0
11203298	1.0	0.0080163407838	0.0080163407838	0.0080163407838	0.0	1.0	0.0	1.0	0.07712084475872097	0.055394970288120016	0.055394970288120016	0.055394970288120016	1.0	1.0
11203202	1.0	0.00719415198546	0.0136688887724	0.0136688887724	0.0	0.526315789474	0.0	1.0	1.0	0.04337045911236	0.0616641598754	0.0616641598754	0.7218749999998515	1.0
11203248	1.0	0.0641307262704	0.0521062150947	0.0669056134648	0.0	0.952662721893	0.0	0.781092028196141	1.0	0.363201901666392	0.362276939268272	0.38673705601817204	0.9441937782001868	0.9423668234248148
11203252	1.0	0.00750247278484	0.00750247278484	0.00750247278484	0.0	1.0	0.0	1.0	1.0	0.09784046700233999	0.10965943097844	0.10965943097844	0.8953594176522867	1.0
11203284	1.0	0.0137716623722	0.0137716623722	0.0137716623722	0.0	1.0	0.0	1.0	1.0	0.08776865422263999	0.08776865422263999	0.08776865422263999	1.0	1.0
11203270	1.0	0.0166493231663	0.0166493231663	0.0166493231663	0.0	1.0	0.0	1.0	1.0	0.09290733421223996	0.09290733421223996	0.09290733421223996	1.0	1.0
11203244	1.0	0.0498451958993	0.0498451958993	0.0498451958993	0.0	1.0	0.0	1.0	1.0	0.10318469419153	0.11500365816763	0.11500365816763	0.900776531492548	1.0
11203258	1.0	0.050975705497	0.050975705497	0.050975705497	0.0	1.0	0.0	1.0	1.0	0.10431520378922997	0.11613416776533	0.11613416776533	0.902293967714412	1.0
11203404	1.0	0.0218907767558	0.0218907767558	0.0218907767558	0.0	1.0	0.0	1.0	1.0	0.11932014935891999	0.12774758454172	0.12774758454172	0.92819349962208	1.0
11203332	1.0	0.035970759927300006	0.0703999158577	0.0703999158577	0.0	0.429782082324	0.0	1.0	0.09866378156110288	0.10996775177774	0.14439690770814	0.14439690770814	0.6953428201808693	1.0
11203246	0.996897915564	0.12785035814200002	0.0688583118608	0.667206209851	0.0	0.223893425011	0.0	0.07228538757667176	0.996897915564	0.14838960877424004	0.26166977739240005	2.3984484595681	0.08542919628220333	0.09354529828586428
11204606	1.0	0.122506130952	0.196811443602	0.196811443602	0.0	0.6165374677000001	0.0	1.0	1.0	0.1973253116008	0.2716306242508	0.2716306242508	0.7190416925947275	1.0
11203154	1.0	0.0		0.0	0.0	0.650485436893	0.0	0.0	0.29001230418755697	0.0244889239548	0.00894130318193	1.33934176457	0.0398664759180345	0.008926035142268378
11203136	1.0	0.0135661151726	0.0135661151726	0.0135661151726	0.0	1.0	0.0	1.0	1.0	0.1532354372902	0.1532354372902	0.1532354372902	1.0	1.0
11203126	1.0	0.0240490223514	0.0240490223514	0.0240490223514	0.0	1.0	0.0	1.0	1.0	0.08961857901886999	0.09362674941076997	0.09362674941076997	0.9571899012071832	1.0
11203114	1.0	0.0141827567713	0.0141827567713	0.0141827567713	0.0	1.0	0.0	1.0	0.052959215687089306	0.12713094294299998	0.12713094294299998	0.12713094294299998	1.0	1.0
11203108	1.0	0.00441926479107	0.00441926479107	0.00441926479107	0.0	1.0	0.0	1.0	1.0	0.11078994057607	0.11479811096797	0.11479811096797	0.965085049238804	1.0
11205462	0.0	0.0	0.0	0.0	0.0	0.0120141342756	0.0	0.00588525276891395	0.0	0.0	0.0	0.0	0.0669110907425004	0.13182623871386873
11205504	0.0	0.0	0.0	0.0	0.0	0.00979020979021	0.0	0.015620132908259622	0.0	0.0	0.0	0.0	0.008119658119659565	0.0945844511383186
11205508	0.0	0.0	0.0	0.0	0.0	0.0	0.0	0.004140139129011227	0.0	0.0	0.0	0.0	0.037712681985645424	0.1868674887150064
11205586	0.0	0.0		0.0	0.0	0.0	0.0	0.0	0.0	0.0	0.0	0.0	0.0490095977129157	0.1371862310591548
11205598	0.0	0.0		0.0	0.0	0.0	0.0	0.0	0.0	0.0	0.0	0.0	0.005629272215523134	0.008266643471466712
11205618	0.0	0.0		0.0	0.0	0.0008771929824560001	0.0	0.0	0.0	0.0	0.0	0.0	0.014877789585548097	0.06398518487408028
11203106	1.0	0.0740997654502	0.0740997654502	0.0740997654502	0.0	1.0	0.0	1.0	0.07403562834949101	0.1129481861717	0.1129481861717	0.1129481861717	1.0	1.0
11203100	0.319395478926	0.0		0.0	0.0	0.0304594734125	0.0	0.0	0.134577560915013	0.03485358820763998	0.19137263513453	3.0602038807081	0.021372799397137616	0.035539583295042136
11203422	1.0	0.00143883039709	0.00143883039709	0.00143883039709	0.0	1.0	0.0	1.0	0.25922368240769644	0.10760395898259	0.11603139416539004	0.11603139416539004	0.9210307564422376	1.0
11202956	1.0	0.0	0.0	0.0	0.0	0.6898734177220001	0.0	1.0	0.4976630991159723	0.0	0.0	0.0	0.5329474621551834	0.7427847632979109
11203046	1.0	0.0	0.0	0.0	0.0	1.0	0.0	1.0	1.0	0.0	0.0	0.0	0.048008849557547965	0.052226750748701485
11203032	1.0	0.0	0.0	0.0	0.0	1.0	0.0	1.0	1.0	0.0	0.0	0.0	0.7366375121479494	0.8215238912908548
11203026	1.0	0.0	0.0	0.0	0.0	1.0	0.0	1.0	1.0	0.0	0.0	0.0	0.4107981220658826	0.4878402473668591
11203010	0.865402768821	0.0	0.0	0.0	0.0	0.7833333333329999	0.0	1.0	0.7235481234128901	0.0	0.0	0.0	0.3861872736679944	0.4359744641480228
11202994	1.0	0.0	0.0	0.0	0.0	1.0	0.0	1.0	0.9939862464027104	0.0	0.0	0.0	0.3498902305161657	0.4237550759313631
11202988	0.861338102631	0.0	0.0	0.0	0.0	0.8361344537819999	0.0	1.0	0.861338102631	0.0	0.0	0.0	0.5541573033709384	0.5938858389094906
11205564	0.0	0.0		0.0	0.0	0.000227946204696	0.0	0.0	0.0	0.0	0.0	0.0	0.006313316693586764	0.00905556114235988
11205584	0.0	0.0		0.0	0.0	0.0131233595801	0.0	0.0	0.0	0.0	0.0	0.0	0.01996672212979078	0.0801465011201458
11205588	0.0	0.0		0.0	0.0	0.0	0.0	0.0	0.0	0.0	0.0	0.0	0.058982550995366964	0.16510222990825293
11205626	0.00588212655485	0.0		0.0	0.0	0.05	0.0	0.0	0.001760118742656288	0.0	0.0	0.0	0.06904487917150408	0.19326840434311887
11205652	0.0	0.0		0.0	0.0	0.0	0.0	0.0	0.0	0.0	0.0	0.0	0.04443641618500222	0.1213513319177531
11205742	0.0002839924570940001	0.0		0.0	0.0	0.000328839197632	0.0	0.0	0.0002839924570940001	0.0	0.0	0.0	0.0378578024007651	0.10338580694008637
11205666	0.0	0.0		0.0	0.0	0.0	0.0	0.0	0.0	0.0	0.0	0.0	0.03953077293912458	0.10795451928277056
11205654	0.0	0.0		0.0	0.0	0.00230946882217	0.0	0.0	0.0	0.0	0.0	0.0	0.06323907455017283	0.17269947904799002
11202990	0.8779520636779999	0.0	0.0	0.0	0.0	1.0	0.0	1.0	0.944282463853	0.0	0.0	0.0	0.5103603603603054	0.4685168230764001
11202984	1.0	0.0	0.0	0.0	0.0	1.0	0.0	1.0	0.9929235419999012	0.0	0.0	0.0	0.343403547672092	0.4180054037399909
11202976	0.9587066451890001	0.0	0.0	0.0	0.0	0.873563218391	0.0	1.0	0.9861024299088704	0.0	0.0	0.0	0.6910874556463386	0.8548755720956175
11202966	1.0	0.0	0.0	0.0	0.0	0.814236111111	0.0	1.0	1.0	0.0	0.0	0.0	0.6906232453676396	0.8316840315037637
11202962	0.524198756222	0.0	0.0	0.0	0.0	0.56043956044	0.0	1.0	0.1795575698420405	0.0	0.0	0.0	0.6706529538391773	0.8435026660793081
11202964	0.763826280174	0.0	0.0	0.0	0.0	0.487394957983	0.0	1.0	0.19212677966468664	0.0	0.0	0.0	0.6841857176529811	0.8457894524811658
11202948	1.0	0.0	0.0	0.0	0.0	0.881355932203	0.0	1.0	0.8522856687429745	0.0	0.0	0.0	0.6969621513948243	0.8536683223064522
11205636	0.0	0.0		0.0	0.0	0.0582524271845	0.0	0.0	0.0	0.0	0.0	0.0	0.07087069713629525	0.1943306258306859
11205628	0.0	0.0	0.0	0.0	0.0	0.0	0.0	0.08686961540931427	0.0	0.0	0.0	0.0	0.09074858757067167	0.2711161629578676
11205716	0.0	0.0		0.0	0.0	0.0	0.0	0.0	0.0	0.0	0.0	0.0	0.038297406718471705	0.1613368156273476
11205706	0.0	0.0		0.0	0.0	0.0	0.0	0.0	0.0	0.0	0.0	0.0	0.03650777093982612	0.1537975548157223
11205718	0.0	0.0	0.0	0.0	0.0	0.00190839694656	0.0	0.04654660204606727	0.0	0.0	0.0	0.0	0.0474447607428647	0.1998721916793181
11205766	0.0	0.0	0.0	0.0	0.0	0.0	0.0	0.0074569063778196065	0.0	0.0	0.0	0.0	0.03958910433981002	0.16449935593040868
11206224	0.0042796180242399996	0.0	0.0	0.0	0.0	0.539267015707	0.0	1.0	0.0042796180242399996	0.0	0.0	0.0	0.6644547666448035	1.0
11206226	0.00789054596438	0.0	0.0	0.0	0.0	0.506493506494	0.0	1.0	0.005317086126444403	0.0	0.0	0.0	0.6671204901296024	1.0
11206346	0.06811548893899999	0.0	0.0	0.0	0.0	0.553117380704	0.0	1.0	0.06275391775270979	0.0	0.0	0.0	0.6868832236844526	1.0
11206262	0.0	0.0	0.0	0.0	0.0	0.472252448313	0.0	1.0	0.0	0.0	0.0	0.0	0.3588156574106945	0.7067264916160441
11202912	1.0	0.0	0.0	0.0	0.0	0.7107195301029999	0.0	0.3761921040522267	0.12243058682318965	0.0	0.0	0.0	0.6058227019951531	0.1609057187625628
11206114	0.0144553375378	0.0	0.0	0.0	0.0	0.17362270450800002	0.0	1.0	0.0144553375378	0.0	0.0	0.0	0.34233947870297304	0.8751832608904881
11206112	0.021498900121299996	0.0	0.0	0.0	0.0	0.19315403423	0.0	1.0	0.021498900121299996	0.0	0.0	0.0	0.32539173462827303	0.8920534789960991
11208348	0.0227027082651	0.0	0.0	0.0	0.0	0.382018060463	0.0	0.8458290297453772	0.021132404684155087	0.0	0.0	0.0	0.3582546568001541	0.7506838975219137
11208346	0.000320322015565	0.0	0.0	0.0	0.0	0.282299270073	0.0	1.0	0.000320322015565	0.0	0.0	0.0	0.3091374893255076	0.8336474966202402
11206328	0.0	0.0	0.0	0.0	0.0	0.443266171792	0.0	1.0	0.0	0.0	0.0	0.0	0.3382091322398665	0.6534514660764403
11208354	0.00042999780868100004	0.0		0.8282846138169999	0.0	0.0180033020691	0.0	0.0	0.00042999780868100004	0.0	0.0	0.8282846138169999	0.04278453719397665	0.04965723442228506
11207522	0.9406416819	0.0	0.0	0.0	0.0	1.0	0.0	1.0	0.3742675388984777	0.507971700281	0.509285098407	0.509285098407	0.9932228915659268	1.0
11207548	0.110104631237	0.0	0.0	0.0	0.0	0.114107883817	0.0	0.12457185816399202	0.24657083929208434	1.80831193242888	1.80831193242888	1.80831193242888	0.4421593830332409	0.4525820106107192
11207562	1.0	0.0007504886598330001	0.0007504886598330001	0.0007504886598330001	0.0	1.0	0.0	1.0	0.2888927408051059	1.861221382947113	1.861221382947113	1.861221382947113	0.9830303030304668	0.9904610148365948
11207626	0.00103674911878	0.0	0.0	0.180045424349	0.0	0.0148075024679	0.0	0.0026608621792527675	0.004340820018707588	0.7946401928351	0.7118384938509	3.1112507810910004	0.1910890210349271	0.14164357444293754
11207610	0.0124495126936	0.0		0.0330575588741	0.0	0.0	0.0	0.0	0.0009237179960921373	0.14341305829293302	0.10356743505689996	1.24719579231151	0.12421448288009873	0.08612814824709923
11208458	0.004834955696520001	0.0		0.325529540976	0.0	0.0	0.0	0.0	0.004834955696520001	0.006266899887119999	0.01982696224878	0.7285917989786901	0.044426602435364164	0.07415395497235508
11202898	1.0	0.0	0.0	0.0	0.0	0.200704225352	0.0	0.11230936268049314	0.7252553261238677	0.0	0.0	0.0	0.3983604068620633	0.04945598490810023
11207596	1.0	0.0	0.0	0.0	0.0	1.0	0.0	1.0	0.3337131422204645	1.05885183996738	1.05885183996738	1.05885183996738	0.6033057851239877	0.6132340099443749
11207680	0.212875998213	0.0	0.0	0.0	0.0	0.0662460567823	0.0	0.07109896966081437	0.1924718078782928	0.48669189590115003	0.48594140724115	0.4878176288911501	0.4070442265358058	0.4144091446322439
11207684	0.985392725225	0.0	0.0	0.0	0.0	0.959459459459	0.0	0.9563892814791682	0.1902404056282965	0.3791860697453001	0.3783093833986	0.3989259615336001	0.42349528643920265	0.4277745440655938
11207656	1.0	0.000375244329916	0.000375244329916	0.000375244329916	0.0	0.970588235294	0.0	1.0	0.164689620416413	0.3589228759298161	0.358046189583116	0.378662767718116	0.4693611473269316	0.46391951476476095
11207536	0.0	0.0		0.0	0.0	0.0	0.0	0.0	0.0	0.410517296928	0.350478204142	1.7812848341089005	0.07555494278209844	0.06439528890948201
11207580	0.00501082022175	0.0		0.16743502890999998	0.0	0.0	0.0	0.0	0.00501082022175	0.410517296928	0.350478204142	1.85415829188	0.06612368024115355	0.056357047416045
11207534	0.0	0.0		0.0	0.0	0.0	0.0	0.0	0.0	0.410517296928	0.350478204142	1.7812848341089005	0.09283415212579367	0.07912231584964813
11207574	0.000156444494463	0.0		0.0945615711389	0.0	0.0	0.0	0.0	7.182369940070245e-05	0.410517296928	0.350478204142	1.7812848341089005	0.10725119874714943	0.09140992865455973
11202824	0.9962405837389999	0.0	0.0	0.0	0.0	0.963068181818	0.0	1.0	0.9025847826849908	0.0	0.0	0.0	0.8854294928170375	0.9941549489877024
11202766	1.0	0.0	0.0	0.0	0.0	0.8795976728129999	0.0	0.9901698703269172	0.9855476410155511	0.0	0.0	0.0	0.8708371151291691	0.9930400513150364
11202848	1.0	0.0	0.0	0.0	0.0	1.0	0.0	1.0	0.8810471224063617	0.0	0.0	0.0	0.7542662116042559	1.0
11202768	0.9954530748289999	0.000188490707842	0.000188490707842	0.000188490707842	0.0	0.8513422818790001	0.0	1.0	0.9954530748289999	0.016537579472238998	0.021180403223255	0.021180403223255	0.4468475821260108	0.5578598816172998
11207650	0.15282998944099999	0.410517296928	0.350478204142	1.6867232629700002	0.0	0.12353471596	0.0	0.1052883296799984	0.13270558734265522	0.914810907975016	0.8574963927017161	2.7606851955460163	0.238439024390012	0.21816236740180173
11207660	1.0	0.0303947907232	0.034522478352300004	0.034522478352300004	0.0	0.8804347826090001	0.0	1.0	0.2238544703554679	0.39143147454121596	0.394444889585016	7.666817413919317	0.07176123319121568	0.0601594264675085
11207670	0.957131157407	0.0187622164958	0.023640392784700003	0.023640392784700003	0.0	0.793650793651	0.0	1.0	0.1093000242177348	0.443025895539516	0.446915996929816	7.710830941126716	0.07207870432340142	0.059292718861111024
11207674	0.089319738937	0.07092117835419999	0.062665803096	1.09356415417	0.0	0.0326368502849	0.0	0.028964729836349005	0.089319738937	0.8110812190865	0.7598697680801	3.2337243749877005	0.21037287095300888	0.17066540266401584
11207336	0.0	0.0		0.678607037247	0.0	0.0	0.0	0.0	0.0	0.0131335515471	0.0	2.4317695096693996	0.007113565988782687	0.0018873973249940547
11207144	0.000546636372184	0.0		0.381307972908	0.0	0.0	0.0	0.0	0.000546636372184	0.0131335515471	0.0	3.1883244588604	0.00443563116422086	0.0011768778707067766
11207124	0.00407840309629	0.0		0.730775895994	0.0	0.0	0.0	0.0	0.00407840309629	0.0131335515471	0.0	3.9232991990714	0.004238733252129736	0.001098782491417976
11207084	0.0016775536179699999	0.0		0.439842449458	0.0	0.0	0.0	0.0	0.0016775536179699999	0.0131335515471	0.0	4.3509094841134	0.005430013163666895	0.0012369740366582908
11207074	0.0172862044676	0.0		3.15650924296	0.0	0.0	0.0	0.0	0.010680835836349413	0.0	0.0	6.0370573673560015	0.001999294366695427	0.0
11202700	0.829387610657	0.0	0.0	0.0	0.0	0.8279430789129999	0.0	1.0	0.12720444728582567	0.013174508421797631	0.01781733217281363	0.01781733217281363	0.31687622563155715	0.5000430184955446
11202628	1.0	0.00540670714599	0.00540670714599	0.00540670714599	0.0	1.0	0.0	1.0	1.0	0.01534711184376	0.01534711184376	0.01534711184376	0.9917661589133844	1.0
11202624	1.0	0.004841235022470001	0.004841235022470001	0.004841235022470001	0.0	1.0	0.0	1.0	1.0	0.02857122308342	0.032152546532380005	0.03308507950804	0.3940955951265557	0.4605040616976688
11202566	1.0	0.0111804751441	0.0111804751441	0.0111804751441	0.0	1.0	0.0	1.0	1.0	0.024335142438750002	0.02410696947663	0.03103152284895	0.7534386143658798	0.7663090706751325
11202660	1.0	0.0	0.0	0.0	0.0	1.0	0.0	1.0	1.0	0.0	0.0	0.0	1.0	1.0
11204574	1.0	0.0	0.0	0.0	0.0	0.99855907781	0.0	1.0	1.0	0.0	0.0	0.0	0.8079978088198058	1.0
11202540	1.0	0.0	0.0	0.0	0.0	1.0	0.0	1.0	1.0	0.0	0.0	0.0	0.9036786060022672	1.0
11207060	0.0021334097213	0.0		3.99935043619	0.0	0.0	0.0	0.0	0.0021334097213	0.0	0.0	10.036407803546	0.0016710901405692733	0.0
11207080	0.0103607695999	0.0		0.0	0.0	0.0	0.0	0.0	0.0103607695999	0.0	0.0	2.8805481243960003	0.00242165242165402	0.0
11207076	0.0149040618865	0.0		0.453159953904	0.0	0.0	0.0	0.0	0.010950956145851046	0.0	0.0	2.8805481243960003	0.002680542415643522	0.0
11207082	0.053931852921699996	0.0		0.269483608259	0.0	0.00472440944882	0.0	0.0	0.01590698836896056	0.0131335515471	0.0	4.180550642914399	0.006266896043252367	0.0013856298007098769
11207122	0.183738750761	0.0		0.718543731578	0.0	0.043795620438	0.0	0.0	0.02186310558719071	0.0131335515471	0.0	3.9110670346554	0.006329518572979658	0.001441884191314747
11207130	0.609360084256	0.0		0.0	0.0	0.333333333333	0.0	0.0	0.004430242864451039	0.0131335515471	0.0	3.1925233030774	0.005661482397342541	0.001467593586018999
11202534	1.0	0.0	0.0	0.0	0.0	0.8645224171539999	0.0	1.0	1.0	0.0	0.0	0.0	0.6294779938587619	1.0
11202536	1.0	0.0	0.0	0.0	0.0	0.7963386727689999	0.0	1.0	1.0	0.0	0.0	0.0	0.7566317088220308	1.0
11202974	1.0	0.0	0.0	0.0	0.0	1.0	0.0	1.0	1.0	0.0	0.0	0.0	0.8148387096773961	0.930565731307994
11202968	1.0	0.0	0.0	0.0	0.0	1.0	0.0	1.0	1.0	0.0	0.0	0.0	0.7283950617283161	0.8418538078854422
11207712	0.019823436996	0.0		0.005472788048789999	0.0	0.0	0.0	0.0	0.005126286767354397	0.006266899887119999	0.01982696224878	0.40306225800269	0.07301517484043905	0.1218721146928545
11207758	0.000155599328692	0.0		0.4771460395130001	0.0	0.0	0.0	0.0	0.000155599328692	0.00101347926829	0.00842967607605	1.497392172357	0.004582621978612579	0.005302297235991883
11207746	0.0029216633166299997	0.0		0.199402051036	0.0	0.0	0.0	0.0	0.0033269072038644627	0.00101347926829	0.00842967607605	1.21964818388	0.00433452320244598	0.005015235928892884
11207764	0.00384755587793	0.0		0.0374989635729	0.0	0.0	0.0	0.0	0.00384755587793	0.0	0.0	0.9686521820006558	0.0	0.0
11207722	0.0008040732202719997	0.0		0.108885415493	0.0	0.0	0.0	0.0	0.0008040732202719997	0.00101347926829	0.00842967607605	0.973349195713	0.006075768406001835	0.007029933993251569
11202562	1.0	0.0	0.0	0.0	0.0	1.0	0.0	1.0	0.23799046435851395	0.0	0.0	0.0	0.9020141535115396	1.0
11202444	1.0	0.0	0.0	0.0	0.0	0.885906040268	0.0	1.0	1.0	0.0009126918484985	0.0009126918484985	0.0009126918484985	0.9605551497440687	1.0
11202398	1.0	0.000605154377809	0.000605154377809	0.000605154377809	0.0	1.0	0.0	1.0	0.9347558082818744	0.0111804751440975	0.0111011106355375	0.0111804751440975	0.5539980885629054	0.5620027964644185
946040029	1.0	0.0		0.0	0.0	0.0	0.0	0.0	0.09405314414943608	0.0	0.0	0.0	0.02526144234681792	0.011001311661202813
946040086	1.0	0.0		0.0	0.0	0.00512820512821	0.0	0.0	0.08846647982990223	0.0	0.0	0.0	0.02424867793107471	0.010447911487351514
946040085	0.06933619554499999	0.0		0.0	0.0	0.0560189420438	0.0	0.0	0.06933619554499999	0.0	0.0	0.0	0.04326819208484512	0.0
11202784	1.0	0.0		0.0	0.0	0.070796460177	0.0	0.0	0.9986373418387776	0.0	0.0	0.0	0.05365126676588013	0.03017982777996881
11204592	1.0	0.0	0.0	0.0	0.0	0.774132492114	0.0	0.012622027617434785	0.9999999971196212	0.0	0.0	0.0	0.6556922543753665	0.4164644389468711
11202764	1.0	0.0		0.0	0.0	0.0694444444444	0.0	0.0	0.09001277599074126	0.0	0.0	0.0	0.5726941115164809	0.5108677632436409
11202718	1.0	0.0	0.0	0.0	0.0	1.0	0.0	1.0	1.0	0.0	0.0	0.0	1.0	1.0
11207854	0.0	0.0		0.12823658195	0.0	0.0	0.0	0.0	0.0	0.0	0.0	1.0585566906235	0.0	0.0
11209716	0.0	0.0		0.623641113161	0.0	0.0	0.0	0.0	0.0	0.0	0.0	1.6821978037845	0.0	0.0
11207826	0.0	0.0		0.0146383268075	0.0	0.0	0.0	0.0	0.0	0.0	0.0	0.9303201086735	0.0	0.0
11207806	0.0	0.0		0.2129211172	0.0	0.0	0.0	0.0	0.0	0.0	0.0	0.942901811054	0.0	0.0
11207776	0.0	0.0		0.317929940909	0.0	0.0	0.0	0.0	0.0	0.00350835931749	0.0	1.1912708079034982	0.0020656741933173365	0.0
11207762	0.0	0.0		0.610454521244	0.0	0.0	0.0	0.0	0.0	0.00350835931749	0.0	1.2167971463864982	0.0018409191899944198	0.0
11207820	0.0	0.0		0.320833410689	0.0	0.0	0.0	0.0	0.0	0.0	0.0	1.236515192555	0.0	0.0
11207188	0.745035374259	0.7139858002770001	0.873902694206	0.873902694206	0.0	0.817008352316	0.0	1.0	0.7695343774187392	1.7584222776343	1.9183391715633002	1.9183391715633002	0.9166378415773684	1.0
11207176	1.0	0.911725362064	0.913052473217	0.913052473217	0.0	0.998546511628	0.0	1.0	0.9874518454333688	1.7544409441748998	1.7902729453044999	1.7902729453044999	0.9800664451827966	1.0
11207170	1.0	0.0935613362817	0.0935613362817	0.0935613362817	0.0	1.0	0.0	1.0	0.9955590556023284	1.4863644912841998	1.4863644912841998	1.4863644912841998	1.0	1.0
11207166	1.0	0.0637013353407	0.0637013353407	0.0637013353407	0.0	1.0	0.0	1.0	1.0	1.3636067096379996	1.3636067096379996	1.3636067096379996	1.0	1.0
11207164	1.0	0.0291964453645	0.0291964453645	0.0291964453645	0.0	1.0	0.0	1.0	0.9955849984532972	1.3928031550024995	1.3928031550024995	1.3928031550024995	1.0	1.0
11207090	1.0	0.019906667294	0.019906667294	0.019906667294	0.0	1.0	0.0	1.0	0.979214570337168	1.2733631512369998	1.2866342627670002	1.2866342627670002	0.9896854048478648	1.0
11207092	1.0	0.045121779199699986	0.045121779199699986	0.045121779199699986	0.0	1.0	0.0	1.0	0.979574901690812	1.2985782631427	1.3118493746727	1.3118493746727	0.9898836621143196	1.0
11207280	1.0	0.06303777976430001	0.06303777976430001	0.06303777976430001	0.0	1.0	0.0	1.0	1.0	1.0922153809948	0.9303010655709002	7.3785617328388	0.4057617187502539	0.3471837751388908
11207266	1.0	0.06834622437599999	0.06834622437599999	0.06834622437599999	0.0	1.0	0.0	1.0	1.0	1.0975238256065	0.9356095101826002	7.3838701774505	0.4069200779729629	0.34845632138618343
11207822	0.00015648187908200002	0.0		0.452699329864	0.0	0.0	0.0	0.0	5.082174694984002e-05	0.0	0.0	1.182680023718	0.0	0.0
11207804	0.0	0.0		0.462982452002	0.0	0.0	0.0	0.0	0.0	0.00350835931749	0.0	1.3363233189964978	0.0019364316239304281	0.0
11207772	0.0	0.0		0.266998241852	0.0	0.0	0.0	0.0	0.0	0.00350835931749	0.0	0.873340866994498	0.002849842767293837	0.0
11207756	0.0	0.0		0.000846845352498	0.0	0.0	0.0	0.0	0.0	0.00350835931749	0.0	0.6063426251424979	0.0037487073422934453	0.0
11207702	0.00182972908802	0.0193564652	0.0774258607998	1.73607069782	0.0	0.0296741478073	0.0	0.09224035939428996	0.00182972908802	0.021607962204179	0.07867798742513	1.7810821405421728	0.23970610745452184	0.24985203791318875
11207644	0.00621261298303	0.0401646652899	0.0361723943424	2.80801803288	0.0	0.0255337214944	0.0	0.03121309203978482	0.00621261298303	0.042416162294079005	0.03742452096773	2.853029475602173	0.18873040198046687	0.1742006359323941
11207558	0.0022021010167899997	0.0	0.00302444768749	1.0554112650299998	0.0	0.0	0.0	0.0019789365257851027	0.0022021010167899997	0.0	0.00786356398748	1.0656465237427808	0.0434904798707413	0.05041721984644887
11207560	1.9667188057000002e-05	0.0	0.01112996749	0.8288196442810001	0.0	0.0	0.0	0.009772695266177186	1.9667188057000002e-05	0.0	0.01596908378999	0.8390549029937808	0.05735730170499082	0.07255984820296671
11207606	0.019205288174	0.0	0.00483911629999	0.00967823259998	0.0	0.0	0.0	0.2890489270515925	0.0024770461708214803	6.5532483859e-05	0.00483911629999	0.010759518583652998	0.5365365365366812	0.5578555775277382
11207258	1.0	0.0729911134113	0.0729911134113	0.0729911134113	0.0	1.0	0.0	1.0	1.0	1.1598980497943	0.9979837343704	7.4462444016383	0.4202000952837161	0.3630454366290845
11203396	1.0	3.21401027365	3.09056474569	3.52368443249	0.0	0.8060364361460001	0.0	0.6502932072795188	1.0	5.3928496724351005	3.7677988680453	5.722021196325097	0.8443477953396257	0.6057053992453554
11203406	1.0	0.0132577943732	0.0132577943732	0.0132577943732	0.0	1.0	0.0	1.0	1.0	2.1920971931583004	0.6904919167285	2.2115945582083	0.9808176100632576	0.4599975604132129
11203360	1.0	0.0331958727329	0.022301871154900003	0.0331958727329	0.0	1.0	0.0	0.7993349124299896	1.0	2.2060744027301	0.7044691263003	2.2255717677801	0.9813541189060552	0.475100792331963
11203318	1.0	0.0245628903504	0.0248712111497	0.0248712111497	0.0	0.989051094891	0.0	1.0	0.07608260071751664	0.06731670786402	0.07409976545022001	0.07409976545022001	0.8996188055909021	1.0
11203330	1.0	0.0484063655022	0.0319625895354	0.0484063655022	0.0	1.0	0.0	0.6758206139488724	1.0	2.1728785299972	0.6821672551454	2.1923758950472	0.9797274842144098	0.4468151637092538
11203310	1.0	2.09723716055	0.622969661665	2.1167345256	0.0	0.976506836126	0.0	0.3899577912708838	1.0	2.14461579005432	0.6703482911693199	2.16411315510432	0.9786825091739154	0.4464530508596365
11207600	0.00260984454344	0.0		1.02492483234	0.0	0.0	0.0	5.165892421449105e-05	0.00260984454344	6.5532483859e-05	0.0	1.0260061183236728	0.0671174555472257	0.06604788984903406
11207630	0.0198045686672	0.0	0.0	0.0	0.0	0.0	0.0	0.13448441591884458	0.019567353471975	0.0022514970041790003	0.00125212662533	0.045011442722173	0.4721982758622022	0.42688481152690055
11207636	0.07989194100319999	0.0	0.0	0.0	0.0	0.0	0.0	0.3643653109757788	0.021807481078400002	0.0022514970041790003	0.00125212662533	0.045011442722173	0.4890079232229926	0.4372938870987084
11207652	0.0318855223675	0.0	0.0	0.0	0.0	0.654135338346	0.0	0.6270495635604095	0.002562192762994043	0.0022514970041790003	0.00125212662533	0.045011442722173	0.4896089385476242	0.43738351998556335
11207792	0.00017608311787799998	0.0		0.336197604942	0.0	0.0	0.0	0.0	0.00017608311787799998	0.00350835931749	0.0	0.9416933847319999	0.0024613817687983443	0.0
11207754	0.00276619224525	0.00350835931749		0.6054957797899999	0.0	0.00375210247121	0.0	0.0	0.002763689227447939	0.09968579577978999	0.0124607244725	2.9557809680528013	0.0501444887849349	0.017522460781859008
11203214	1.0	0.00493313279003	0.005138679989609999	0.00524145358941	0.0	0.941176470588	0.0	0.9728885160998074	1.0	0.299071175395992	0.310170724173572	0.31983144255337204	0.9425742574261158	0.97320749147986
11203204	1.0	0.000102773599792	0.000102773599792	0.000102773599792	0.0	1.0	0.0	1.0	1.0	0.294651910604923	0.30554591218292304	0.31510385696292303	0.9430361720311397	0.97341816236406
11203196	1.0	0.0006166415987540001	0.0006166415987540001	0.0006166415987540001	0.0	1.0	0.0	1.0	1.0	0.2945491370051311	0.30544313858313105	0.31500108336313104	0.9429386590588676	0.9733726585050542
11203206	1.0	0.000205547199585	0.000205547199585	0.000205547199585	0.0	1.0	0.0	1.0	1.0	0.294138042605962	0.305032044183962	0.31458998896396195	0.9425947187145038	0.9732121607520708
11203192	1.0	0.00030832079937700003	0.00030832079937700003	0.00030832079937700003	0.0	1.0	0.0	1.0	1.0	0.293932495406377	0.304826496984377	0.314384441764377	0.9425122161544499	0.9731736614142612
11203194	1.0	0.00554977438878	0.005138679989609999	0.00585809518816	0.0	0.953846153846	0.0	0.8931694164052771	1.0	0.29917394899578004	0.30965685617461003	0.31993421615316003	0.9425904977379302	0.9716423020719904
11203228	1.0	0.00092496239813	0.00092496239813	0.00092496239813	0.0	1.0	0.0	1.0	1.0	0.319317574555092	0.33021157613309204	0.339769520913092	0.946808510638652	0.9751785021436742
11207726	0.0306026393298	0.0961774364623	0.0124607244725	2.34972816215	0.0	0.0546632954667	0.0	0.01443571938520425	0.02459459968957417	0.09842893346647899	0.013712851097830001	2.3947396048721727	0.15620835033324093	0.11296496004405394
11207654	0.00880123742053	0.0	0.0	0.000557026112801	0.0	0.491428571429	0.0	0.4405889075293839	0.030202522710826126	0.16143943553517898	0.20100380337633	0.25138081052817296	0.5314171122995204	0.5408217318596245
11207634	0.000233682051427	0.0	0.0	0.758773435839	0.0	0.0136013800425	0.0	0.01108819218044044	0.000233682051427	0.16143943553517898	0.20100380337633	1.0095972202543722	0.2378653592306617	0.24168834784034154
11207628	0.023226749478000002	0.0	0.0	0.0	0.0	1.0	0.0	1.0	0.012589960390680126	0.16143943553517898	0.20100380337633	0.25082378441537195	0.5332517696408664	0.5454203714448185
11207736	0.0	0.000131064967718	0.0	0.08111141232800001	0.0	0.0583457425206	0.0	0.010764325621637151	0.0	0.16157050050289698	0.20100380337633	0.331935196743372	0.34039585903556874	0.3290114994265993
11207604	0.0	6.5532483859e-05	0.0	0.000524259870872	0.0	0.941787941788	0.0	0.8776950326149637	0.006502099030517965	0.16143943553517898	0.20100380337633	0.25082378441537195	0.5254975124378496	0.5378682756257159
11207586	0.00327649484053	0.0	0.0	0.0635134014374	0.0	0.0922868741543	0.0	0.05163662379493842	0.00327649484053	0.16137390305132002	0.20100380337633	0.3138129259819	0.26711015456861514	0.250254873779865
11207400	0.0	0.0	0.0	0.0	0.0	0.007606528321390002	0.0	0.007588758691172464	0.0	0.0	0.0	0.0	0.1081462140991836	0.10101626288623662
11203234	1.0	0.024254569551	0.024254569551	0.024254569551	0.0	1.0	0.0	1.0	1.0	0.318392612156962	0.32928661373496204	0.338844558514962	0.9464954521137858	0.9750324152114004
11203226	1.0	0.000205547199585	0.000205547199585	0.000205547199585	0.0	1.0	0.0	1.0	1.0	0.318598159356547	0.32949216093454703	0.33905010571454697	0.9465669249268852	0.9750657675822108
11203222	1.0	0.000205547199585	0.000205547199585	0.000205547199585	0.0	1.0	0.0	1.0	1.0	0.319523121754677	0.33041712333267703	0.33997506811267697	0.9468650371948276	0.9752048799309816
11203232	1.0	0.0006166415987540001	0.0006166415987540001	0.0006166415987540001	0.0	1.0	0.0	1.0	1.0	0.32013976335343103	0.33103376493143105	0.34059170971143105	0.9471737982042608	0.9753489614527772
11203220	1.0	0.000719415198546	0.000719415198546	0.000719415198546	0.0	1.0	0.0	1.0	1.0	0.29979059059453805	0.310890139372118	0.32055085775191805	0.9428169014088223	0.9733206992623394
11203230	1.0	0.00287766079418	0.00287766079418	0.00287766079418	0.0	1.0	0.0	1.0	1.0	0.301948836190172	0.313048384967752	0.322709103347552	0.9432643935162994	0.9735294808220528
11203288	1.0	0.0226101919543	0.029084928741200007	0.029084928741200007	0.0	0.7556270096459999	0.0	1.0	1.0	0.06690561346476	0.07338035025166001	0.07338035025166001	0.8983957219250079	1.0
11203286	1.0	0.027235003945	0.027235003945	0.027235003945	0.0	1.0	0.0	1.0	1.0	0.07153042545546001	0.07153042545546001	0.07153042545546001	1.0	1.0
11203280	1.0	0.0063719631871200005	0.0063719631871200005	0.0063719631871200005	0.0	1.0	0.0	1.0	1.0	0.04429542151046	0.04429542151046	0.04429542151046	1.0	1.0
11207446	0.0	0.0	0.0	0.0	0.0	0.0483848797251	0.0	0.02922884098898224	0.0	0.0125648652538	0.0378924676552	0.0378924676552	0.3236001223937791	0.27233855017051417
11208470	0.0569269274324	0.0125648652538	0.0378924676552	0.0378924676552	0.0	0.5021798641390001	0.0	0.4118836357740596	0.032761715793310844	0.0125648652538	0.0378924676552	0.0378924676552	0.4519292398411987	0.38569729483758536
11207434	0.0	0.0	0.0	0.0	0.0	1.0	0.0	0.9502987814014794	0.032515073272281744	0.0	0.0	0.0	0.3655689144449249	0.3406936564586961
11207402	0.0957879371957	0.0	0.0	0.0	0.0	0.8634920634919999	0.0	0.8607477257172149	0.06780494430706854	0.005740036256609999	0.00466986000538	0.005740036256609999	0.20773703041139469	0.1947648951522889
11207020	0.0	0.0		0.0	0.0	0.0	0.0	0.0	0.0	0.006712923757729999	0.006712923757729999	0.007102078758180002	0.030580744742447194	0.03429820519993123
11206998	0.00742438792238	0.006712923757729999	0.006712923757729999	0.007102078758180002	0.0	0.0357062401442	0.0	0.0400467667382842	0.00635864518376323	0.006712923757729999	0.006712923757729999	0.02270822882568	0.21928571428599564	0.19229970403328736
11203472	1.0	0.0360735335271	0.0360735335271	0.0360735335271	0.0	1.0	0.0	1.0	1.0	0.13021415093689995	0.13216684933279998	0.13216684933279998	0.9859259259260044	1.0
11203522	1.0	0.015621587168399996	0.015621587168399996	0.015621587168399996	0.0	1.0	0.0	1.0	1.0	0.0703999158577	0.0703999158577	0.0703999158577	1.0	1.0
11205544	0.0267876239712	0.0		0.0	0.0	0.0	0.0	0.0	0.0267876239712	0.0	0.0	0.0	0.0196261682242786	0.0
11205526	0.0008646693716289999	0.0		0.0	0.0	0.0	0.0	0.0	0.005408952654176581	0.0	0.0	0.0	0.06365403304180926	0.0
11205534	0.004533169026649999	0.0		0.0	0.0	0.0	0.0	0.0	0.01127986409091219	0.0	0.0	0.0	0.026471416502372547	0.0
11205510	0.00518243877589	0.0		0.0	0.0	0.0	0.0	0.0	0.00518243877589	0.0	0.0	0.0	0.05857366420748645	0.0
11205570	0.006249914613020001	0.0		0.0	0.0	0.0	0.0	0.0	0.006249914613020001	0.0	0.0	0.0	0.016423357664216452	0.0
11205512	0.0	0.0		0.0	0.0	0.0	0.0	0.0	0.0015386808104425082	0.0	0.0	0.0	0.08432571612490729	0.0
11205568	0.0	0.0		0.0	0.0	0.0	0.0	0.0	0.005757373955593895	0.0	0.0	0.0	0.02215189873415412	0.0
11203474	1.0	0.029084928741200007	0.029084928741200007	0.029084928741200007	0.0	1.0	0.0	1.0	1.0	0.123225546151	0.1251782445469	0.1251782445469	0.9849683544304636	1.0
11203442	1.0	0.0040081703919	0.0040081703919	0.0040081703919	0.0	1.0	0.0	1.0	1.0	0.0941406174098	0.09609331580569999	0.09609331580569999	0.980632008155052	1.0
11206790	0.0	0.0003631198324	0.0003631198324	0.0003631198324	0.0	1.0	0.0	1.0	0.18784020184922934	0.42823554569045	0.43589877308682	2.7946158631888003	0.2672404670355342	0.27432609008207776
11206902	0.991319754147	0.0330784875896	0.0330784875896	0.0330784875896	0.0	1.0	0.0	1.0	0.4122982865646617	0.07186314397408299	0.07288333778895799	0.11151237138796903	0.3875781031425276	0.3933044703281103
11206924	0.982841744926	0.00231705035912	0.00231705035912	0.00231705035912	0.0	1.0	0.0	1.0	0.2872369715048205	0.051597599042039	0.050162411133039	0.05668127669563899	0.8523279063123179	0.8287280461324645
11207352	0.166178238435	13.5686154724	13.480944058599999	23.6105423363	0.0	0.597281831187	0.0	0.5660027828378476	0.011217129989738972	235.2055829044	634.0462329926	1173.9091037263001	0.5127181178922073	0.4801475676515372
11207264	0.010145240066600001	259.80180703599996	372.26928247300003	536.001478517	0.0	0.703606900157	0.0	0.7105036763872526	0.004167135066893877	481.438774468	992.834571407	1686.3000399070002	0.5248213614142371	0.4990099270301099
11207044	0.27655130835700004	221.636967432	620.565288934	1150.29856139	0.0	0.485612747908	0.0	0.4526282300772022	0.2497605189219873	262.32929495600206	632.0330671444931	2402.871064871756	0.0835534467358086	0.06868544004016942
11206926	0.0020540664242	40.6764539999	11.453339874300001	1252.55154628	0.0	0.0377308285882	0.0	0.025197107960502	0.02537395424223127	40.71523865628448	11.49314472449936	1252.6299801637986	0.0563226779545726	0.04546098490495104
11205580	0.00413959550376	0.0		0.0	0.0	0.0	0.0	0.0	0.00413959550376	0.0	0.0	0.0	0.08678641294688398	0.0
11205566	0.0017176573689	0.0		0.0	0.0	0.0	0.0	0.0	0.003579961713653232	0.0	0.0	0.0	0.06285988483687306	0.0
11205700	0.012023827724200001	0.0		0.0	0.0	0.000486085794143	0.0	0.0	0.012023827724200001	0.0	0.0	0.0	0.0404499576238783	0.0
11205614	0.00309694860492	0.0		0.0	0.0	0.0	0.0	0.0	0.005915195344921128	0.0	0.0	0.0	0.06488011283501127	0.0
11205502	0.057463579144299996	0.0		0.0	0.0	0.0445859872611	0.0	0.0	0.01782764950079594	0.0	0.0	0.0	0.09885686684917916	0.0
11205574	0.00851532061579	0.0		0.0	0.0	0.0	0.0	0.0	0.006482849504433852	0.0	0.0	0.0	0.021384928716881985	0.0
11205458	0.00115898826136	0.0	0.0	0.0	0.0	0.00791717417783	0.0	0.0009350051971956062	0.00115898826136	0.0	0.0	0.0	0.07616409901338454	0.13452184537036638
11206826	0.00229769838397	0.00814425909812	0.00503180339183	0.0147322903431	0.0	0.0949788263763	0.0	0.05870455102774218	0.00229769838397	0.436898547406284	0.44125911346986896	2.8161609732445503	0.2341906114990401	0.2344884076140573
11206796	0.0	0.0005187426177140001	0.00032853699121900004	0.006812819712649999	0.0	0.025402201524099995	0.0	0.016328953359719248	0.19035913175908487	0.42875428830816403	0.436227310078039	2.8014286829014505	0.2575685743308609	0.2640079519693414
11206792	0.0	0.00134873080606	0.00143518790901	0.0043574379888	0.0	0.309523809524	0.0	0.3261607370424332	0.16397271745584546	0.4292211566641101	0.43697084116343	2.7986101813452	0.2670748775364033	0.2742499241942448
11206774	0.018108552400799997	0.00499722055065	0.0057753344772200005	0.0155449871108	0.0	0.321468298109	0.0	0.3723419123072264	0.11481344859642527	0.42787242585805	0.43553565325442	2.7942527433564	0.26669726066049	0.27378813639285593
11203506	0.25390037450999997	0.294446363405	0.308937440976	0.512840262963	0.0	0.296273483215	0.0	0.3107341454430869	0.2618206371095553	0.3851954520216541	0.401639227988554	0.6055420499755539	0.35690897183996834	0.37186465625981
11204660	0.265299994825	0.406171693017	0.411189333063	2.7442805378500004	0.0	0.284116532876	0.0	0.2861968014718176	0.2367651558937713	0.701234698020754	0.720743415637754	3.2577374424117544	0.287960903480146	0.2938187771873436
11208478	0.172960911486	0.0167035122904	0.018570985714200003	0.0344272183956	0.0	0.183824928639	0.0	0.20456842487850493	0.15452815063498976	0.4228752053074	0.4297603187772	2.7787077562456	0.26490211090416604	0.2705579841982073
11203456	0.0400712545038	0.132577943732	0.127336490143	0.458473028673	0.0	0.0579931666966	0.0	0.05563806213117408	0.0400712545038	0.9570277612655	0.9848794068101999	4.1497136639042	0.146538703587414	0.15117501796027152
11205422	0.0	0.0		0.0101114364224	0.0	0.0	0.0	0.0	0.0	0.0	0.0	0.0964378248791	0.0	0.0
11205434	0.0	0.0		0.010869794154100002	0.0	0.0	0.0	0.0	0.0	0.0	0.0	0.0863263884567	0.0	0.0
11202530	0.0	0.0		0.0458806427669	0.0	0.0	0.0	0.0	0.0	0.0	0.0	0.0754565943026	0.0	0.0
11202528	0.0	0.0		0.0208127066362	0.0	0.0	0.0	0.0	0.0	0.0	0.0	0.0503886581719	0.0	0.0
11205454	0.0	4.21309850935e-05		0.0387605062861	0.0	0.00212916962385	0.0	0.0	0.0	4.21309850935e-05	0.0	0.089149164458	0.0007372818874427748	0.0
11202642	0.0	0.0		0.0295759515357	0.0	0.0	0.0	0.0	0.0	0.0	0.0	0.0295759515357	0.0006714789323487144	0.0
11202546	0.0	0.0		0.0188325503368	0.0	0.0	0.0	0.0	0.0	0.0	0.0	0.0417518062277	0.0	0.0
11205466	0.0	0.0		0.0364433021059	0.0	0.0	0.0	0.0	0.0	0.0	0.0	0.07819510833360001	0.0	0.0
11205382	0.0	0.0		0.039064727054199985	0.0	0.0	0.0	0.0	0.0	0.0	0.0	0.12553133599068	0.002404186112291557	0.0
11204678	0.00173678868614	0.0		0.0	0.0	0.0	0.0	0.0	0.00173678868614	0.186842404422	0.169370892458	8.874342426830003	0.04620527917770171	0.04172462667422122
11203674	0.00189358617555	0.0		0.0130749575947	0.0	0.0	0.0	0.0	0.00189358617555	0.0	0.0	0.0130749575947	0.0	0.0
11203620	0.0	0.0		0.0	0.0	0.0	0.0	0.0	0.0	0.186842404422	0.169370892458	8.874342426830003	0.062024850128960786	0.056010130491849525
11203368	0.0	0.000626142355031		6.3500591794300005	0.0	0.00211304807184	0.0	0.0	0.0	0.002681614350881	0.00205547199585	6.352320198625431	0.08441198224853783	0.06521679506416778
11203690	0.00263691553197	0.0		0.0	0.0	0.0	0.0	0.0	0.00263691553197	0.0	0.0	0.0	0.0	0.0
11203348	0.0028557007798900003	0.0	0.0	0.0	0.0	0.00837885135493	0.0	4.685366803027411e-05	0.0028557007798900003	0.0	0.0	0.0	0.09680728298498556	0.07921559329701643
11202690	1.0	0.0	0.0	0.0	0.0	1.0	0.0	1.0	1.0	0.0	0.0	0.0	1.0	1.0
11204596	0.969650774919	0.0		0.0	0.0	0.192135128002	0.0	0.0	0.969650774919	0.0	0.0	0.0	0.1815539624103286	0.01711979028570955
11205356	0.0	0.0		0.0277551239706	0.0	0.0	0.0	0.0	0.0	0.0	0.0	0.1233819836853	0.0022546419098161273	0.0
11200454	0.0	0.0		0.0070344155165	0.0	0.0	0.0	0.0	0.0	0.0	0.0	0.06545788270618999	0.0	0.0
11208474	0.0	0.0		0.00190444291547	0.0	0.0	0.0	0.0	0.0	0.0	0.0	0.058423467189689986	0.0	0.0
11205394	0.0	0.0		0.0365697171146	0.0	0.0	0.0	0.0	0.0	0.0	0.0	0.1508735083771371	0.0017979904812283024	0.0
11205456	0.0	0.0		0.066581122388	0.0	0.0	0.0	0.0	0.0	0.0	0.0	0.1622436251018371	0.0016133624371276075	0.0
11205450	0.0	0.0		0.0351796401483	0.0	0.0	0.0	0.0	0.0	0.0	0.0	0.10204259955938	0.002277599142552733	0.0
11205494	0.0	0.0		0.0567792976253	0.0	0.0	0.0	0.0	0.0	0.0	0.0	0.11426814826333	0.0019502122289794198	0.0
11205448	0.0	0.0		0.00958796676787	0.0	0.0	0.0	0.0	0.0	0.0	0.0	0.05752449363717	0.0037037037037066655	0.0
11205496	0.0	0.0		0.027469402281	0.0	0.0	0.0	0.0	0.0	0.0	0.0	0.07760527454230001	0.0	0.0
11202842	0.998384442542	0.0		0.0	0.0	0.140525195174	0.0	0.0	0.998384442542	0.0	0.0	0.0	0.12451708766725945	0.0
11202582	0.230969152766	0.0	0.0	0.0	0.0	0.149911999172	0.0	0.1944186721087924	0.230969152766	0.0	0.0	0.0	0.2814478863600228	0.33415111705449474
11202466	0.31012449304	0.0	0.0	0.0	0.0	0.290295307688	0.0	0.19920818481178165	0.31012449304	0.02291650184819	0.02265856719533	0.02301570748389	0.3329967180007223	0.2695490711390623
11207408	1.0	0.0111882062629	0.0111882062629	0.0111882062629	0.0	1.0	0.0	1.0	0.33991528831180395	0.14262530766456002	0.14359819516556002	0.14359819516556002	0.993284083277217	1.0
11207406	1.0	0.0110909175128	0.0110909175128	0.0110909175128	0.0	1.0	0.0	1.0	0.33963594649560075	0.14661414641916998	0.14758703392016995	0.14758703392016995	0.9934080421883824	1.0
11207396	0.443343734638	0.017366041895	0.013912291266	0.18000910710499998	0.0	0.625418060201	0.0	0.4790973335945127	0.3512845673275231	0.15999134955955	0.15751048643155	0.32360730227054996	0.9317673378075364	0.9128915563449436
11207398	1.0	0.00184848625213	0.00184848625213	0.00184848625213	0.0	1.0	0.0	1.0	0.34490333399206746	0.14447379391668	0.14544668141768	0.14544668141768	0.9933687002651034	1.0
11207378	1.0	0.00559410313144	0.00559410313144	0.00559410313144	0.0	1.0	0.0	1.0	0.3603442269190837	0.14262530766454998	0.14359819516554995	0.14359819516554995	0.993284083277217	1.0
11207366	1.0	0.00204306375235	0.00204306375235	0.00204306375235	0.0	1.0	0.0	1.0	0.3457273549555994	0.13143710140165998	0.13240998890266	0.13240998890266	0.99272197962138	1.0
11205538	0.0	0.0		0.0221187671741	0.0	0.0	0.0	0.0	0.0	0.0	0.0	0.05776158056326	0.0	0.0
11202594	0.0	0.0		0.030165785327	0.0	0.0	0.0	0.0	0.0	0.0	0.0	0.035642813389160005	0.0	0.0
11202598	0.0	0.0		0.0330306923133	0.0	0.0	0.0	0.0	0.0	0.0	0.0	0.03850772037546	0.0	0.0
11205562	0.0	0.0		0.0770575717361	0.0	0.0	0.0	0.0	0.0	0.0	0.0	0.11556529211156	0.0	0.0
11202612	0.0	0.0		0.00547702806216	0.0	0.0	0.0	0.0	0.0	0.0	0.0	0.00547702806216	0.0	0.0
11205644	0.0	0.0		0.052368814471300006	0.0	0.0	0.0	0.0	0.0	0.0	0.0	0.11699774560480004	0.0	0.0
11202652	0.0	0.0		0.025657769922	0.0	0.0	0.0	0.0	0.0	0.0	0.0	0.0646289311335	0.0	0.0
11207364	1.0	0.000681021250784	0.000681021250784	0.000681021250784	0.0	1.0	0.0	1.0	0.3418640833273322	0.13771222578389405	0.13868511328489402	0.13868511328489402	0.9930483142160416	1.0
11207362	1.0	0.007637166883800002	0.007637166883800002	0.007637166883800002	0.0	1.0	0.0	1.0	0.3629555997424391	0.13703120453311002	0.13800409203411002	0.13800409203411002	0.9930143206425258	1.0
11207328	1.0	0.0	0.0	0.0	0.0	1.0	0.0	1.0	0.8477639320556157	0.00715072313324	0.00715072313324	0.00715072313324	1.0	1.0
11207322	0.9998880504440001	0.00413477187976	0.0072966562584	0.0072966562584	0.0	0.5666666666669999	0.0	1.0	0.13085891917832104	0.046601311303692	0.056232897564749994	0.056232897564749994	0.8287197231835389	1.0
11207326	0.18607476067	0.010701762512299998	0.00189713062719	0.015663488768	0.0	0.683229813665	0.0	0.12080851968622322	0.0907538715368778	0.073598939459716	0.042126028798509005	0.08439799072215899	0.8720461095102854	0.5005199902909071
11207314	0.0153926525547	0.0277272937819	0.00296730687842	0.0306459562853	0.0	0.904761904762	0.0	0.09772784435817597	0.07694020614299593	0.069415523204924	0.04684453317894301	0.075350136961783	0.9212395093609962	0.6233065460398709
11207312	0.41283371986999995	0.00282137375325	0.0019944193773	0.00306459562853	0.0	0.920634920635	0.0	0.6485487108115616	0.09782391698809267	0.044509603176274004	0.045871645677823	0.047768776305013	0.9317718940938168	0.9621098438403642
11207302	0.21764860457	0.00116746500134	0.00131339812651	0.00131339812651	0.0	0.888888888889	0.0	1.0	0.08401716052982053	0.041688229423024005	0.043877226300522994	0.044704180676483	0.9325353645267932	0.9836053295648632
11202680	0.0	0.0		0.0294074275953	0.0	0.0	0.0	0.0	0.0	0.0	0.0	0.0713698887485	0.0	0.0
11205660	0.0	0.0		0.008468328003800001	0.0	0.0	0.0	0.0	0.0	0.0	0.0	0.0798382167523	0.0	0.0
11205678	0.0	0.0		0.0203913967853	0.0	0.0	0.0	0.0	0.0	0.0	0.0	0.093193739027	0.0	0.0
11202684	0.0	0.0		0.0308398810885	0.0	0.0	0.0	0.0	0.0	0.0	0.0	0.0728023422417	0.0	0.0
11202742	0.0	0.0		0.0419624611532	0.0	0.0	0.0	0.0	0.0	0.0	0.0	0.0419624611532	0.003234252271683269	0.0
11205616	0.0	0.0		0.017821406694599997	0.0	0.0	0.0	0.0	0.0	0.0	0.0	0.08986539120449999	0.0	0.0
11202646	0.0	0.0		0.0330728232984	0.0	0.0	0.0	0.0	0.0	0.0	0.0	0.0720439845099	0.0	0.0
11202740	0.0	0.0		0.0389711612115	0.0	0.0	0.0	0.0	0.0	0.0	0.0	0.0389711612115	0.003418525150584317	0.0
11207294	0.46438596690399997	0.00214035250247	0.00340510625392	0.00340510625392	0.0	0.628571428571	0.0	1.0	0.1394899333523682	0.0426124725491	0.049130818806574016	0.049130818806574016	0.8673267326733872	1.0
11207292	0.0	0.00252950750291	0.0022862856276300004	0.00257815187797	0.0	0.981132075472	0.0	0.8980677882481318	0.11965462004162924	0.06562126195058399	0.069026368204513	0.07009654445577299	0.9361554476060978	0.9864158914463199
11207284	0.0	0.000340510625392	0.0007296656258399999	0.0007296656258399999	0.0	0.466666666667	0.0	1.0	0.13872068739638088	0.04047212004663	0.04572571255265402	0.04572571255265402	0.8851063829788841	1.0
11207282	0.0	9.72887501121e-05	0.000145933125168	0.000145933125168	0.0	0.666666666667	0.0	1.0	0.13933540240700001	0.0631890431977861	0.066886015702051	0.06766432570297097	0.9338605319916404	0.9898114355118596
11207270	0.0	0.00214035250247	0.00160526437685	0.00214035250247	0.0	1.0	0.0	0.7803569339308691	0.11825960062407975	0.06309175444767401	0.06674008257688299	0.06751839257780301	0.9344380403460886	0.9897894141188736
11207250	0.0	0.000632376875728	0.000681021250784	0.000681021250784	0.0	0.928571428571	0.0	1.0	0.13801034005784785	0.061583778820932	0.06581583945081701	0.066059061326117	0.9322533136968816	0.9966804136259484
11207278	0.257618961599	0.005059015005830001	0.00719936750829	0.00719936750829	0.0	0.7027027027030001	0.0	1.0	0.14485630266206695	0.06523210695013801	0.07145858695731401	0.071701808832614	0.9097693351427496	0.9969416565156296
11207246	0.0	0.000778310000896	0.000875598751009	0.000875598751009	0.0	0.888888888889	0.0	1.0	0.07552947774151075	0.060951401945204	0.065134818200033	0.06537804007533299	0.9322916666669429	0.9966458346012188
11202746	0.0	0.0		0.0	0.0	0.0	0.0	0.0	0.0	0.0	0.0	0.0	0.005040403232268054	0.0
11205476	0.0	0.0		0.0524308517306	0.0	0.0	0.0	0.0	0.0	0.0004634408360290001	0.0	0.12000895182060002	0.0018923103388999829	0.0
11205552	8.00495873528e-05	0.0		0.0534855996084	0.0	0.0	0.0	0.0	8.00495873528e-05	0.0004634408360290001	0.0	0.11672420823374002	0.002880335166280597	0.0
11205550	8.01791900408e-06	0.0		0.0708994200759	0.0	0.0	0.0	0.0	8.01791900408e-06	0.0004634408360290001	0.0	0.13413802870124	0.0021243723445395135	0.0
11205578	0.0	0.0		0.00918455475039	0.0	0.0	0.0	0.0	7.569162561746384e-06	0.0004634408360290001	0.0	0.06922120850861999	0.006695069993929155	0.0
11205576	0.0	0.0		0.0641549209759	0.0	0.0	0.0	0.0	0.0	0.0004634408360290001	0.0	0.12419157473413002	0.003222970993268562	0.0
11205594	0.0	0.0		0.00290703797145	0.0	0.0	0.0	0.0	7.4374087230076095e-06	0.0004634408360290001	0.0	0.06551368182039	0.007073954983939294	0.0
11205478	0.0	0.0		0.0	0.0	0.0	0.0	0.0	0.0	0.0004634408360290001	0.0	0.06757810009000001	0.004678860059560018	0.0
11205596	0.0	0.0		0.0352215035382	0.0	0.0	0.0	0.0	0.0	0.0004634408360290001	0.0	0.09782814738714	0.004680851063840682	0.0
11205696	0.0	0.0004634408360290001		0.0323565965518	0.0	0.014322916666700002	0.0	0.0	0.0	0.0029205250793896	0.0	0.34719216878854	0.006878480183428887	0.0
11207234	0.683025665249	0.0163445100188	0.0187767287716	0.0187767287716	0.0	0.870466321244	0.0	1.0	0.2015719153520101	0.06017309194430801	0.064259219449024	0.064502441324324	0.9328808446458288	0.9966003029442221
11207208	0.138594661653	0.00301595125347	0.00403748312965	0.00403748312965	0.0	0.7469879518070001	0.0	1.0	0.2069520946173572	0.036045481916498	0.038623633794514	0.03920736629520402	0.9193548387099528	0.9847507545277832
11207186	0.999995906533	0.0122097381391	0.0124043156393	0.0124043156393	0.0	0.98431372549	0.0	1.0	0.26619969763090257	0.045239268802127995	0.046990466304164	0.04757419880485402	0.9509202453989682	0.987432625919625
11207158	0.591620291835	0.00637241313234	0.0064210575074	0.0064210575074	0.0	0.992424242424	0.0	1.0	0.7070575891356237	0.08269543759522799	0.08420341322196401	0.089213783852754	0.9269356597602678	0.9430133929248838
11207154	0.0	0.00277272937819	0.00335646187887	0.00335646187887	0.0	0.826086956522	0.0	1.0	0.6208142934643545	0.07894982071591	0.08094424009321001	0.08595461072399999	0.918505942275258	0.940852610426846
11207132	0.0	0.000145933125168	0.000194577500224	0.000194577500224	0.0	0.75	0.0	1.0	0.6607676885882979	0.076323024462888	0.077782355714564	0.08279272634535399	0.9218566392481568	0.9385937500729946
11207114	0.00625584193559	0.0251004975289	0.0264625400305	0.0267057619058	0.0	0.939890710383	0.0	0.9917887098434212	0.4330412517052509	0.07822015509006999	0.08074966259298	0.08576003322377	0.912081678956536	0.940718413286578
11207046	0.0	0.00141068687662	0.00150797562674	0.00184848625213	0.0	0.763157894737	0.0	0.7951870117198704	0.34409743549158883	0.06926959007977	0.06494024069978	1.07998064858797	0.26151587447236685	0.2448984274275345
11205668	0.0	0.0		0.0350853376804	0.0	0.0	0.0	0.0	0.0	0.0001263929552806	0.0	0.13280702510019002	0.0009927200529453906	0.0
11205670	0.0	0.000126392955281		0.115094823439	0.0	0.0008841732979660002	0.0	0.0	0.0	0.0002527859105616	0.0	0.21281651085879005	0.0010750761512273086	0.0
11205694	0.0	0.0		0.00813128012305	0.0	0.0	0.0	0.0	0.0	0.0024570842433606	0.0	0.32296685235978995	0.006273094440148488	0.0
11205736	0.0	0.0		0.0187904193517	0.0	0.0	0.0	0.0	0.0	0.0024570842433606	0.0	0.31483557223673997	0.006378888500524987	0.0
11205714	0.0	0.0		0.08957492714029999	0.0	0.0	0.0	0.0	0.0	0.0024570842433606	0.0	0.3935828362080219	0.005430739473293257	0.0
11205712	0.0	0.0		0.0683480423904	0.0	0.0	0.0	0.0	0.0	0.0024570842433606	0.0	0.372355951458122	0.005684030211010509	0.0
11205732	0.0	0.0		0.00745718436156	0.0	0.0	0.0	0.0	0.0	0.0024570842433606	0.0	0.304007909067722	0.006525431304193077	0.0
11202682	0.0	0.0		0.0	0.0	0.0028490028490000003	0.0	0.0	0.0	0.00158729017129763	0.0031150569611726304	0.0031150569611726304	0.1129641283826534	0.3329431849590088
11202674	0.0	0.0	0.0	0.0	0.0	0.0127388535032	0.0	0.023631399446187872	0.0	0.00158729017129763	0.0031150569611726304	0.0031150569611726304	0.07323255182404942	0.2083546093285086
11202664	0.0	0.0		0.0	0.0	0.0069736842105300005	0.0	0.0	0.0	0.0011706265013299998	0.0011706265013299998	1.49660930341	0.04828872784668803	0.04152914001541305
11205966	0.00812553961716	0.0		0.0	0.0	0.0	0.0	0.0	0.00812553961716	0.0044085966656	0.0	0.154582643067	0.005459292665559164	0.0
11206018	0.0	0.00040078151505400017		0.14268813840999994	0.0	0.000461254612546	0.0	0.0	0.0	0.012023445451634002	0.0	0.9330292860968001	0.007245501751004366	0.0
11202932	0.0751319575491	0.0	0.0	0.0	0.0	0.0006121824303639999	0.0	0.09531736906317087	0.0751319575491	0.0	0.0	0.0	0.37767311608980464	0.5108150569272268
11202834	0.253832577229	0.0	0.0	0.0	0.0	0.4345281638620001	0.0	0.5118458996040233	0.13078079267597487	0.0	0.0	0.0	0.10958181079981798	0.15402003599505398
11204588	0.0	0.0		0.0	0.0	0.00145560407569	0.0	0.0	0.0	0.0	0.0	0.0	0.004636574389744747	0.0
11202820	0.0	0.0		0.0	0.0	0.0090031392525	0.0	0.0	0.0	0.0	0.0	0.0	0.007083119986344595	0.0
11207062	0.230062607401	0.0163931543939	0.0167823093943	0.0167823093943	0.0	0.976811594203	0.0	1.0	0.3236567248748007	0.08425205759705	0.08021457446734	1.09491447173014	0.30107713690061777	0.28652439621391257
11207028	0.170970119622	0.0496659069322	0.0496172625571	0.0540439006872	0.0	0.91899189919	0.0	0.9169914081681759	0.14802406687290126	0.1137791932561	0.10818509012459	1.1558172293003899	0.33112955408629186	0.3137655214457686
11206988	0.0	0.000826954375952	0.000875598751009	0.000875598751009	0.0	0.944444444444	0.0	1.0	0.1126936247801171	0.8383990852165021	0.286600653547859	6.301895816345558	0.3076452064380327	0.2554101983094148
11206990	0.0138336456417	0.00204306375235	0.00316188437864	0.00316188437864	0.0	0.6461538461540001	0.0	1.0	0.11019934605183858	0.8396151945929	0.28888693917549	6.304182101973188	0.3085634637163173	0.25845887159798153
11206646	0.0	0.0	0.0	0.0	0.0	0.364197530864	0.0	1.0	0.008584586596529852	0.0	0.0	0.0	0.4961199294534351	0.9770057389346768
11207256	1.0	1.2468209281799998	1.2468209281799998	1.2468209281799998	0.0	1.0	0.0	1.0	1.0	2.3310774948913	2.1804436242672995	8.5251896216063	0.6046511627908906	0.5663578300362162
11207244	1.0	0.100196892046	0.104178225505	0.104178225505	0.0	0.96178343949	0.0	1.0	0.9890827077557328	0.7239391339240999	0.7504813569826999	0.7504813569826999	0.9649737302978248	1.0
11205730	0.0	0.0		0.0401508287941	0.0	0.0	0.0	0.0	0.0	0.0024570842433606	0.0	0.33670155350026193	0.006102148290563233	0.0
11202760	0.0	0.0		0.0631619966662	0.0	0.0	0.0	0.0	0.0	0.00233069128808	0.0	0.2884071616062	0.0071355759429161045	0.0
11202808	0.0	0.0		0.0	0.0	0.0066430469442	0.0	0.0	0.0	0.0	0.0	0.0	0.0032913403699940994	0.0
11202748	0.0	0.0		0.0	0.0	0.0134080936129	0.0	0.0	0.0	0.0	0.0	0.0	0.004497851772296583	0.0
11205804	0.0	0.00260507984785		0.16745267549	0.0	0.0155131264916	0.0	0.0	0.0	0.00493577113593	0.0	0.4558598370962	0.007794891059350845	0.0
11205834	0.0	0.0		0.330043577647	0.0	0.0	0.0	0.0	0.0	0.00493577113593	0.0	0.7859034147431999	0.006750711671408523	0.0
11202754	0.0	4.21309850935e-05		0.03362052610459998	0.0	0.00125313283208	0.0	0.0	0.0	0.0023728222731735	0.0	0.2588656910446	0.006928857226505985	0.0
11202868	0.8323744672669999	0.0	0.0	0.0	0.0	0.297058823529	0.0	0.6076476644187635	0.3902337867370835	0.0	0.0	0.0	0.11213456147374357	0.16019678383902922
11202892	0.160022712648	0.0	0.0	0.0	0.0	0.0183767228178	0.0	0.17213143982720114	0.160022712648	0.0	0.0	0.0	0.10974515084101782	0.16050093754313394
11202644	0.0	0.0	0.00014880845355899998	0.00014880845355899998	0.0	0.0564814814815	0.0	0.4997483869788692	0.0	0.013174508421797631	0.017966140626372633	0.017966140626372633	0.2185991633594373	0.4192137126689083
946040241	1.0	0.08958000282289999	0.0975426697405	0.0975426697405	0.0	0.918367346939	0.0	1.0	1.0	0.6874435772188	0.7100044668184	0.7100044668184	0.9685476410732524	1.0
946040240	0.99205839095	0.411404457409	0.426002680091	0.426002680091	0.0	0.966309341501	0.0	1.0	0.7464898673445659	0.6509480205131999	0.6655462431952001	0.6655462431952001	0.9783037475346676	1.0
11207242	1.0	0.299927120563	0.300590676139	0.300590676139	0.0	0.997792494481	0.0	1.0	0.9898176448729272	0.9236693624411	0.9468938076167	0.9468938076167	0.9756606397775236	1.0
11207232	1.0	0.127402670681	0.135365337599	0.135365337599	0.0	0.941176470588	0.0	1.0	0.9886481198038184	0.7285840229588999	0.7630889129355001	0.7630889129355001	0.9552110249785254	1.0
11205734	0.0	0.0		0.0005055718211219999	0.0	0.0	0.0	0.0	0.0	0.0024570842433606	0.0	0.29655072470616195	0.006630336058129696	0.0
11202770	0.0	0.00233069128808		0.22524516494	0.0	0.007408191343	0.0	0.0	0.0	0.00233069128808	0.0	0.22524516494	0.00606945648702256	0.0
11200456	0.0	0.0		0.006930165501220001	0.0	0.0	0.0	0.0	0.0	0.0	0.0	0.02530711990402	0.0013114754098392698	0.0
11205316	0.0	0.0		0.0	0.0	0.000790513833992	0.0	0.0	0.0	0.0	0.0	0.06888416062788999	0.0003138731952290898	0.0
11205390	0.0	0.0		0.00202228728449	0.0	0.0	0.0	0.0	0.0	0.0	0.0	0.09846011216359	0.0	0.0
11202866	0.0571173066724	0.0	0.0	0.0	0.0	0.13751946030099998	0.0	0.004620981694957504	0.06756138968484432	0.0	0.0	0.0	0.11489263753245856	0.1256199198229828
11207786	0.000319314281472	0.0		0.0716075883247	0.0	0.0	0.0	0.0	0.000319314281472	0.0	0.0	0.1811448210897	0.0005487470276200031	0.0010595653329270084
11205774	0.0	8.42619701871e-05		0.025719833895	0.0	0.00417536534447	0.0	0.0	0.0	0.0024570842433606	0.0	0.2845855249396	0.0068058922245019535	0.0
11207734	0.0033856011249099997	0.0	0.0	0.109537232765	0.0	0.000804181745074	0.0	0.0015527794330818805	0.002495139131882341	0.14341305829293302	0.10356743505689996	1.3299206640325498	0.08726453726451386	0.06109867007607351
11205758	0.0	0.0		0.005982599883279999	0.0	0.0	0.0	0.0	0.0	0.0024570842433606	0.0	0.29604515288503996	0.006637570467358424	0.0
11205724	0.0	0.0		0.088487586665	0.0	0.0	0.0	0.0	0.0	0.0025834771986416	0.0	0.41305541645842997	0.004912099276111825	0.0
11205722	0.0	0.0		0.0517875369005	0.0	0.0	0.0	0.0	0.0	0.0025834771986416	0.0	0.3763553666939301	0.00576456310679628	0.0
11205728	0.0	0.0		0.00678308860006	0.0	0.0	0.0	0.0	0.0	0.0025834771986416	0.0	0.32456782979343	0.006509635974304253	0.0
11207710	0.00559073749159	0.0	0.0	0.0	0.0	0.17384769539099998	0.0	0.018810594444594028	0.00559073749159	0.064986993340433	0.0108820855676	0.753960889222	0.09078044293503597	0.03438123052694833
11207704	0.00306411170059	0.0	0.0	0.155545108264	0.0	0.0229327585175	0.0	0.013556639247411488	0.0038813116323438593	0.14341305829293302	0.10356743505689996	1.360745905389	0.07424214921038902	0.04968126434602944
11207134	1.0	0.00394019437954	0.00394019437954	0.00394019437954	0.0	1.0	0.0	1.0	1.0	0.04022889817134	0.04022889817134	0.04022889817134	1.0	1.0
11205814	0.0	0.00020039075752700008		0.401783468842	0.0	0.000498753117207	0.0	0.0	0.0	0.005136161893457	0.0	0.8576433059381999	0.006638741800361008	0.0
11207222	1.0	0.00476714875549	0.00476714875549	0.00476714875549	0.0	1.0	0.0	1.0	1.0	0.028019160032250003	0.028019160032250003	0.028019160032250003	1.0	1.0
11207296	1.0	0.0175606193952	0.0175606193952	0.0175606193952	0.0	1.0	0.0	1.0	1.0	0.04557977942745	0.04557977942745	0.04557977942745	1.0	1.0
11207216	1.0	0.00282137375325	0.00282137375325	0.00282137375325	0.0	1.0	0.0	1.0	1.0	0.02607338503001	0.02607338503001	0.02607338503001	1.0	1.0
11207168	1.0	0.00462121563032	0.00462121563032	0.00462121563032	0.0	1.0	0.0	1.0	1.0	0.044850113801660006	0.044850113801660006	0.044850113801660006	1.0	1.0
11207126	1.0	0.00968023063615	0.00968023063615	0.00968023063615	0.0	1.0	0.0	1.0	1.0	0.04596893442795	0.04596893442795	0.04596893442795	1.0	1.0
11205772	0.0	0.000926881672058		0.240957188944	0.0	0.004477004477	0.0	0.0	0.0	0.0035103588706996	0.0	0.5460605036241699	0.006076765672473501	0.0
11205740	0.0	4.21309850935e-05		0.0977810347467	0.0	0.000372023809524	0.0	0.0	0.0	0.0026256081837351	0.0	0.41556577594007	0.005421771581467586	0.0
11205752	0.0	0.0		0.0126814265132	0.0	0.0	0.0	0.0	0.0	0.0025834771986416	0.0	0.31778474119337	0.006600660066006786	0.0
11205756	0.0	0.0		0.00383391964351	0.0	0.0	0.0	0.0	0.0	0.0025834771986416	0.0	0.30510331468017	0.0067778471417107074	0.0
11205802	0.0	0.00016852394037399998		0.5406241830349999	0.0	0.00128287363695	0.0	0.0	0.0	0.0027520011390156	0.0	0.8418935780716599	0.005617977528090748	0.0
11205762	0.0	0.000126392955281		0.0112068420349	0.0	0.0112781954887	0.0	0.0	0.0	0.0025834771986416	0.0	0.30126939503666	0.006833303362704743	0.0
11205768	0.0	0.0		0.00547702806216	0.0	0.0	0.0	0.0	0.0	0.0024570842433606	0.0	0.29006255300176004	0.0067243920412682345	0.0
11207094	1.0	0.0146906012669	0.0146906012669	0.0146906012669	0.0	1.0	0.0	1.0	1.0	0.067664325703	0.06727517070250001	0.06878314632930001	0.9614590502407984	0.953022217888368
11207254	1.0	0.0400829650462	0.0400829650462	0.0400829650462	0.0	1.0	0.0	1.0	1.0	0.1169897220099	0.11582225700850005	0.1487544989215	0.7657486546373942	0.7557212900561626
11207490	0.648872994775	0.00997209688649	0.00997209688649	0.00997209688649	0.0	1.0	0.0	1.0	0.4911645887700828	0.01070176251233	0.01070176251233	0.01070176251233	1.0	1.0
11207592	0.004836651715060001	8.619709194419999	1.31218452647	8.69426047787	0.0	0.3886656798480001	0.0	0.3754329521837437	0.04160598381731172	8.72751054904099	1.42275608760364	8.80502991089752	0.5775088967974138	0.5763074028154024
11207556	0.00112034483555	0.0200839972167	0.0365073643989	0.058014144255099986	0.0	0.215644820296	0.0	0.390067036795315	0.00112034483555	0.04046480227408	0.06935409876319	0.17594579293642004	0.31465778316164744	0.4532557974179448
11208472	0.0103600298896	0.00306701435329	0.007321260069149999	0.022953139676200003	0.0	0.145038167939	0.0	0.42817837568745454	0.004900478321123235	0.02038080505738	0.03284673436429	0.11793164868132001	0.6131164209457259	0.6877598439922944
11207530	0.00138792687157	0.0106850822631	0.0161265593415	0.08548065810460001	0.0	0.107920792079	0.0	0.1622450086650909	0.003541735707546533	0.01731379070409	0.02552547429514	0.09497850900512	0.7066178713023608	0.7396128057915227
11207728	0.0	0.0		0.000444849327323	0.0	0.0	0.0	0.0	0.0	0.0961774364623	0.0124607244725	2.350730037590124	0.06255014826445587	0.022211010378819014
11209722	0.0	0.0		0.24727884293	0.0	0.0	0.0	0.0	0.0	0.0	0.0	1.1945358586535	0.0	0.0
11207852	0.0	0.0		0.01693690705	0.0	0.0	0.0	0.0	0.0	0.0	0.0	0.9472570157235	0.0	0.0
11207248	1.0	0.801575136371	0.801575136371	0.801575136371	0.0	1.0	0.0	1.0	0.8740005958345602	1.8858317030823	1.7351978324583002	8.0799438297973	0.5529801324505492	0.5096819640358853
11207214	1.0	0.0530844461173	0.0530844461173	0.0530844461173	0.0	1.0	0.0	1.0	1.0	1.5427667152835995	1.5427667152835995	1.5427667152835995	1.0	1.0
11207226	1.0	0.449890680844	0.449890680844	0.449890680844	0.0	1.0	0.0	1.0	0.9959277747183732	1.9395729500103	1.9395729500103	1.9395729500103	1.0	1.0
11207198	1.0	0.114131559152	0.114131559152	0.114131559152	0.0	1.0	0.0	1.0	0.9880289263385722	0.8427155821108999	0.8772204720875001	0.8772204720875001	0.9609902475619416	1.0
11207196	1.0	0.028532889788	0.028532889788	0.028532889788	0.0	1.0	0.0	1.0	0.987601269594644	0.7571169127468999	0.7916218027235	0.7916218027235	0.9568106312292924	1.0
11205770	0.0	8.42619701871e-05		0.108487286616	0.0	0.0007766990291260001	0.0	0.0	0.0	0.0025413462135477	0.0	0.3930728115555999	0.0056386737839265785	0.0
11207308	0.00159619541502	0.0		0.0	0.0	0.0	0.0	0.0	0.00159619541502	0.0	0.0	1.210586353849	0.0	0.0
11207694	0.026100803354099998	0.0131335515471	0.0	1.71402733792	0.0	0.00862681416827	0.0	0.002288897862209881	0.018228620304563355	0.7435372397016001	0.7009564082833001	4.3617568923670005	0.12328674405231405	0.09015437858635364
11207340	0.0	0.0		0.0391351345024	0.0	0.0	0.0	0.0	0.0009996954740248071	0.0131335515471	0.0	1.7531624724223998	0.008254831504318182	0.002190202062382632
11207576	0.00400438836575	0.0		1.05275673974	0.0	0.0	0.0	0.0	0.005543463113673678	0.064986993340433	0.0108820855676	1.69316751588451	0.06791872419648873	0.05229300935309513
11207578	0.0	0.0		0.328864859548	0.0	0.0	0.0	0.0	0.0	0.064986993340433	0.0108820855676	0.96927563569251	0.14155559304862922	0.10898861895373446
11207334	0.00110907565896	0.0		1.05385401353	0.0	0.0	0.0	0.0	0.004122294464655453	0.0131335515471	0.0	2.8070164859524	0.005921281783348264	0.0015710561223513727
11207142	0.0162408692055	0.0		0.385506817125	0.0	0.000991080277502	0.0	0.0	0.00636167268262258	0.0131335515471	0.0	3.1925233030774	0.005597500650869815	0.0014678801507650324
11207358	0.0121333390731	0.0		0.157829614109	0.0	0.0	0.0	0.0	0.008975968569109077	0.0	0.0	1.210586353849	0.0	0.0
11200414	0.00851843582187	0.0		0.0	0.0	0.0	0.0	0.0	0.007059378091002552	0.0	0.0	0.0	0.030501089324641063	0.0
11205290	0.023551929388700002	0.0		0.0	0.0	0.0	0.0	0.0	0.009655751214913202	0.0	0.0	0.0	0.04069400630917861	0.0
11200434	0.0304468132551	0.0		0.0	0.0	0.0	0.0	0.0	0.009461892039375277	0.0	0.0	0.0	0.03797468354433159	0.0
11200412	0.00500998266131	0.0		0.0	0.0	0.0	0.0	0.0	0.00500998266131	0.0	0.0	0.0	0.014932885906055909	0.0
11205292	0.012917027184299998	0.0		0.0	0.0	0.0	0.0	0.0	0.007807899873885612	0.0	0.0	0.0	0.0356452058579984	0.0
11200432	0.00996643280903	0.0		0.0	0.0	0.0	0.0	0.0	0.0068468779237238035	0.0	0.0	0.0	0.020301094890532213	0.0
11205294	0.014026746406399998	0.0		0.0	0.0	0.0	0.0	0.0	0.00983372720615955	0.0	0.0	0.0	0.07476785142495328	0.0
11205306	0.0	0.0		0.0	0.0	0.0	0.0	0.0	0.008842537153961183	0.0	0.0	0.0	0.08613057912214278	0.0
11205326	0.011661399234799998	0.0		0.0	0.0	0.0	0.0	0.0	0.011661399234799998	0.0	0.0	0.0	0.0206523520734457	0.0
11206220	0.0	0.0	0.0	0.0	0.0	0.0559377804367	0.0	0.2602780022380469	0.0	0.0	0.0	0.0	0.24494548533923904	0.4449776765128818
11206232	0.0	0.0		0.0	0.0	0.491525423729	0.0	0.0	0.0	0.0	0.0	0.0	0.702643969576246	0.8922438924496968
11206196	0.0	0.0	0.0	0.0	0.0	0.402504472272	0.0	0.39383083619003295	0.0	0.0	0.0	0.0	0.6178010471204076	0.7394976093920752
11206096	0.0	0.0	0.0	0.0	0.0	0.0217186024551	0.0	0.3270785034147589	0.0	0.0	0.0	0.0	0.1806223933269214	0.3533159539382235
11206094	0.0	0.0	0.0	0.0	0.0	0.0286576168929	0.0	0.4695925666831898	0.0	0.0	0.0	0.0	0.2054391767732656	0.3918594505770554
11198272	0.0	0.0		0.0	0.0	0.00877192982456	0.0	0.0	0.0	0.000672461756039	0.0	0.0299805866234	0.06069444444445345	0.0
11198246	0.0	0.0		0.0	0.0	0.00277326192981	0.0	0.0	0.0	0.000672461756039	0.0	0.0299805866234	0.026391799286406968	0.0
11206050	0.0	0.0	0.0	0.0	0.0	0.00305676855895	0.0	0.14041365174923048	0.0	0.0	0.0	0.0	0.16856357927785862	0.4287165431163973
11205368	0.0308791201156	0.0		0.0	0.0	0.0	0.0	0.0	0.0308791201156	0.0	0.0	0.0	0.02013574660635593	0.0
11205366	0.0	0.0		0.0	0.0	0.0	0.0	0.0	0.0	0.0	0.0	0.0	0.021145165122379	0.0
11205370	0.0	0.0		0.0	0.0	0.0	0.0	0.0	0.024776167172398826	0.0	0.0	0.0	0.02145612343300221	0.0
11205372	0.0116709667258	0.0		0.0	0.0	0.0	0.0	0.0	0.0116709667258	0.0	0.0	0.0	0.021378813355775454	0.0
11205392	0.00772647068046	0.0		0.0	0.0	0.0	0.0	0.0	0.01895766134658912	0.0	0.0	0.0	0.0214872042491775	0.0
11205386	0.0487997547905	0.0		0.0	0.0	0.0	0.0	0.0	0.0487997547905	0.0	0.0	0.0	0.07588499902213082	0.0
11205420	0.0	0.0		0.0	0.0	0.0	0.0	0.0	0.0	0.0	0.0	0.0	0.07177210506847112	0.0
11206020	0.0	0.0	0.0	0.0	0.0	0.0	0.0	0.2649092944913526	0.0	0.0	0.0	0.0	0.15874777975138207	0.6323579939375971
11206022	0.0	0.0	0.0	0.0	0.0	0.004594180704439999	0.0	0.2570210683050909	0.0	0.0	0.0	0.0	0.17081260364847747	0.6545531985204042
11206032	0.0	0.0	0.0	0.0	0.0	0.214285714286	0.0	1.0	0.0	0.0	0.0	0.0	0.25087108013936016	0.6505493261185145
11205972	0.0	0.0		0.0	0.0	0.0	0.0	0.0	0.0	0.0	0.0	0.0	0.1070698814874982	0.5158806768329701
11205860	0.0	0.0		0.0	0.0	0.0	0.0	0.0	0.0	0.0	0.0	0.0	0.0040609137055877455	0.12769110804664127
11205858	0.0	0.0		0.0	0.0	0.0	0.0	0.0	0.0	0.0	0.0	0.0	0.004197901049479385	0.13199852923262242
11205868	0.0	0.0		0.0	0.0	0.0	0.0	0.0	0.0	0.0	0.0	0.0	0.005971422478146194	0.18776502238890844
11205970	0.0	0.0		0.0	0.0	0.0	0.0	0.0	0.0	0.0	0.0	0.0	0.07911822436959326	0.38120489693802745
11206030	0.0	0.0	0.0	0.0	0.0	0.0224179343475	0.0	0.7049080784480317	0.0	0.0	0.0	0.0	0.193457189014534	0.6622838703008418
11206048	0.0	0.0	0.0	0.0	0.0	0.08695652173910001	0.0	0.5975555122996145	0.0	0.0	0.0	0.0	0.2511477180664177	0.6479069769776337
11205378	0.0	0.0		0.0	0.0	0.0190476190476	0.0	0.0	0.0	0.0	0.0	0.0	0.11311914323964918	0.01460280484266164
11205410	0.0	0.0		0.0	0.0	0.0	0.0	0.0	0.0	0.0	0.0	0.0	0.018549395581511717	0.0
11205396	0.0	0.0		0.0	0.0	0.0	0.0	0.0	0.00677337386921254	0.0	0.0	0.0	0.02236180904524955	0.0
11205384	0.00474784354095	0.0		0.0	0.0	0.0	0.0	0.0	0.006354412384376477	0.0	0.0	0.0	0.031437125748526	0.0
11205322	0.0	0.0		0.0	0.0	0.0	0.0	0.0	0.007945592943530871	0.0	0.0	0.0	0.07653228449692857	0.0
11205334	0.017305102803400002	0.0		0.0	0.0	0.0	0.0	0.0	0.00940703691757232	0.0	0.0	0.0	0.06929811544743407	0.0
11205324	0.0014978817332899999	0.0		0.0	0.0	0.0439289239882	0.0	0.0	0.0059828319543762856	0.0	0.0	0.0	0.09794417516299696	0.01093928987210588
11205328	0.030575109271900002	0.0		0.0	0.0	0.248322147651	0.0	0.0	0.00328588730439768	0.0	0.0	0.0	0.13559322033900614	0.02189768498488604
11206092	0.0	0.0	0.0	0.0	0.0	0.374551971326	0.0	0.9930847203460664	0.0	0.0	0.0	0.0	0.3018273471959291	0.5870170892298119
11206154	0.0	0.0	0.0	0.0	0.0	0.243707093822	0.0	0.8637410678595113	0.0	0.0	0.0	0.0	0.3331125827814461	0.4895347948221276
11206152	0.0006682220440880001	0.0	0.0	0.0	0.0	0.095098154461	0.0	0.4529592524776962	0.0006682220440880001	0.0	0.0	0.0	0.125835073068841	0.4399861225839841
11206194	0.0	0.0		0.0	0.0	0.270833333333	0.0	0.0	0.0	0.0	0.0	0.0	0.5759135357693359	0.6339385967713878
11199952	0.009328259364340001	0.0		0.00272290412613	0.0	0.0	0.0	0.0	0.008724516717396026	0.0	0.0	0.02346448924799	9.962143853330362e-05	0.0
11198178	0.0	0.0		0.0	0.0	0.0	0.0	0.0	0.0	0.0	0.0	0.0	0.0009442870632679877	0.0
11198244	0.0	0.0		0.0	0.0	0.0131233595801	0.0	0.0	0.0	0.000672461756039	0.0	0.0299805866234	0.05830365387153184	0.0
11206208	0.0	0.0		0.0	0.0	0.2	0.0	0.0	0.0	0.0	0.0	0.0	0.6570032573289613	0.8024382368252809
11206206	0.0	0.0	0.0	0.0	0.0	0.35933246538099994	0.0	0.599195025529553	0.0	0.0	0.0	0.0	0.44002095337907976	0.6570703822029689
11205374	0.0	0.0		0.0	0.0	0.478260869565	0.0	0.0	0.0	0.0	0.0	0.0	0.13216598704727214	0.021073042014718827
11205484	0.00328953078251	0.0		0.0	0.0	0.00622027076473	0.0	0.0	0.005312875938793394	0.0	0.0	0.0	0.07237900277824201	0.0
11205452	0.000302386349399	0.0		0.0	0.0	0.0	0.0	0.0	0.000302386349399	0.0	0.0	0.0	0.0035379812695124006	0.0
11205482	0.0230656721024	0.0		0.0	0.0	0.0	0.0	0.0	0.007981699448505032	0.0	0.0	0.0	0.026699029126273567	0.0
11205440	0.0	0.0		0.0	0.0	0.0123456790123	0.0	0.0	0.0	0.0	0.0	0.0	0.11982520699179468	0.0
11205540	0.009842704109110001	0.0		0.0	0.0	0.0	0.0	0.0	0.009842704109110001	0.0	0.0	0.0	0.0195956454121102	0.0
11205424	0.0	4.21309850935e-05		0.019380253143	0.0	0.00214132762313	0.0	0.0	0.0019582885452291807	4.21309850935e-05	0.0	0.1057066415997	0.0002512562814074648	0.0
11205346	0.0	0.0		0.0	0.0	0.0	0.0	0.0	0.0	4.21309850935e-05	0.0	0.1057066415997	0.0002427184466023568	0.0
11205548	0.004660217041640001	0.0		0.0	0.0	0.0	0.0	0.0	0.004660217041640001	0.0	0.0	0.0	0.02056807051907748	0.0
11204584	0.0	0.0		0.0	0.0	0.0	0.0	0.0	0.0	0.0	0.0	0.0	0.0051721214176689715	0.0
11206230	0.0	0.0		0.0	0.0	0.306930693069	0.0	0.0	0.0	0.0	0.0	0.0	0.6668885191347458	0.8197954699013686
11206270	0.0	0.0	0.0	0.0	0.0	0.412162162162	0.0	0.4628049257964246	0.0	0.0	0.0	0.0	0.7072538860103642	0.9117266421367924
11206192	0.0	0.0	0.0	0.0	0.0	0.5464285714289999	0.0	0.1414985536639321	0.0	0.0	0.0	0.0	0.6808219178082168	0.6544421332282834
11206190	0.0	0.0	0.0	0.0	0.0	0.3489519112210001	0.0	0.9772272536593742	0.0	0.0	0.0	0.0	0.5327327327328268	0.8634230665834941
11206268	2.81302506464e-05	0.0	0.0	0.0	0.0	0.6421471172959999	0.0	0.4807855445918615	9.32883868477943e-06	0.0	0.0	0.0	0.7072599531615054	0.7553490669130739
11206316	0.0	0.0	0.0	0.0	0.0	0.5463320463319999	0.0	1.0	0.0	0.0	0.0	0.0	0.7776852622814504	1.0
11206314	0.228804950486	0.0	0.0	0.0	0.0	0.706737120211	0.0	1.0	0.228804950486	0.0	0.0	0.0	0.8027262400605055	1.0
11206486	0.312116463206	0.0	0.0	0.0	0.0	0.830459770115	0.0	1.0	0.20099283714968166	0.0	0.0	0.0	0.8678800134816889	1.0
11204582	0.0	0.0		0.0	0.0	0.0	0.0	0.0	0.0	0.0	0.0	0.0	0.004857461379199542	0.0
11200420	0.0	0.0		0.026989083919	0.0	0.0	0.0	0.0	0.0	0.0	0.0	0.052296203823019985	0.0008933889219795502	0.0
11202706	0.0	0.0		0.0	0.0	0.0	0.0	0.0	0.0	0.0	0.0	0.0	0.005231112254522584	0.0
11204576	0.0	0.0		0.0	0.0	0.0	0.0	0.0	0.0	0.0	0.0	0.0	0.006332082551592642	0.0
11202670	0.0	0.0		0.0	0.0	0.0	0.0	0.0	0.0	0.0	0.0	0.0	0.0035131091015537085	0.0
11200372	0.0	0.0		0.0416031282384	0.0	0.0	0.0	0.0	0.0	0.0	0.0	0.10327358846365	0.00047615268629590187	0.0
11202678	0.0	0.0		0.0	0.0	0.0	0.0	0.0	0.0	0.0	0.0	0.0	0.005688176053710169	0.0
11198234	0.0	0.0		0.0	0.0	0.000818553888131	0.0	0.0	0.0	0.000672461756039	0.0	0.0299805866234	0.010187688570205066	0.0
11198230	0.0	0.0		0.0	0.0	0.000265228538591	0.0	0.0	0.0	0.000672461756039	0.0	0.0299805866234	0.013400335008386327	0.0
11198342	0.00560124105202	0.0016372823083699998		0.373368022567	0.0	0.0253868310001	0.0	0.0	0.00560124105202	0.0031503212594570004	0.0	0.4302330698121	0.06562817209325138	0.0
11206010	0.017646991844200002	0.0	0.0	0.0	0.0	0.0	0.0	1.0	0.005177990475326293	0.0	0.0	0.0	0.4324106423003983	1.0
11208342	0.011307844688699999	0.0	0.0	0.0	0.0	0.108265424913	0.0	1.0	0.011307844688699996	0.0	0.0	0.0	0.5427884615383844	1.0
11205998	0.0250849544076	0.0	0.0	0.0	0.0	0.0952380952381	0.0	1.0	0.004998895339163089	0.0	0.0	0.0	0.4220948410629962	1.0
11206012	0.0211609252125	0.0	0.0	0.0	0.0	0.0384615384615	0.0	1.0	0.005391495255114593	0.0	0.0	0.0	0.42940863079376107	1.0
11206106	0.0113079515041	0.0	0.0	0.0	0.0	0.234218289086	0.0	1.0	0.007435603151981746	0.0	0.0	0.0	0.5128102481985953	1.0
11206210	0.0101555824575	0.0	0.0	0.0	0.0	0.611812216052	0.0	1.0	0.010504101209824224	0.0	0.0	0.0	0.7306722689074261	1.0
11202620	0.0	0.0		0.0	0.0	0.00103842159917	0.0	0.0	0.0	0.0	0.0	0.0	0.004992554961897537	0.0
11202524	0.005703322097350001	0.0		0.0	0.0	0.0	0.0	0.0	0.0029395821357406683	0.0011706265013299998	0.0011706265013299998	1.49660930341	0.054615955779167016	0.04775114465760346
11202500	0.000248390715606	0.0		0.0	0.0	0.0	0.0	0.0	1.8214419666925586e-05	0.0	0.0	0.0	0.06719115458198187	0.04934549023715053
11200396	0.0	0.0		0.00043872389778699993	0.0	0.0	0.0	0.0	0.0	0.0	0.0	0.06575919507120699	0.0	0.0
11202518	0.0	0.0		0.0	0.0	0.00969932104753	0.0	0.0	0.0	0.0	0.0	0.0	0.05685385420283645	0.04047294045785123
11202516	0.0	0.0		0.0	0.0	0.03125	0.0	0.0	0.0	0.0	0.0	0.0	0.0567117585846452	0.04024832476332274
11202508	0.0	0.0		0.0	0.0	0.00617283950617	0.0	0.0	0.0	0.0	0.0	0.0	0.05533063427784477	0.039148421151369586
11202496	0.0	0.0		0.0	0.0	0.0819451907577	0.0	0.0	0.0	0.0	0.0	0.0	0.04658556815042402	0.0
11205864	0.000542090593787	0.0	0.0	0.0	0.0	0.0150133451957	0.0	0.018516584971903147	0.000542090593787	0.0	0.0	0.0	0.02126069263347311	0.2413541336884917
11205518	0.00162578296723	0.0		0.0	0.0	0.0	0.0	0.0	0.0016257829672299993	0.0	0.0	0.0	0.0004368719965051637	0.0
11205520	0.0066950020597	0.0		0.0	0.0	0.0	0.0	0.0	0.0066950020597	0.0	0.0	0.0	0.000538889886833296	0.0
11208322	0.00327919305766	0.0		0.0	0.0	0.0007267441860469999	0.0	0.0	0.0033751097850167108	0.0	0.0	0.0	0.009853890587831864	0.039009015486460935
11205662	0.00020543731916900009	0.0		0.0	0.0	0.00285080772886	0.0	0.0	0.00020543731916900009	0.0	0.0	0.0	0.008608321377329945	0.0299474455658418
11208324	0.000924699093178	0.0		0.0	0.0	0.000752162467093	0.0	0.0	0.000534274502300006	0.0	0.0	0.0	0.01263858093125891	0.050910657461931054
11205486	0.0	0.0		0.0	0.0	0.0	0.0	0.0	0.0	0.0	0.0	0.0	0.01064859632138962	0.04445441726104725
11205488	0.00024755749517299996	0.0		0.0	0.0	0.0	0.0	0.0	0.00024755749517299996	0.0	0.0	0.0	0.009020829916348595	0.037659023315287685
11205590	0.00206760605824	0.0		0.0	0.0	0.0	0.0	0.0	0.001451816323936174	0.0	0.0	0.0	0.013164193393962995	0.05495621473272117
11205746	0.0	0.0	0.0	0.0	0.0	0.0297136682874	0.0	0.1240448758256667	0.0011515843220498993	0.0	0.0	0.0	0.044702284583558335	0.3882858327413806
11200426	0.00108245675726	0.0		0.0323391831898	0.0	0.0	0.0	0.0	0.00035646172890327484	0.0	0.0	0.05764630309382	0.0008216926869370939	0.0
11200388	0.0	0.0		0.00402415713143	0.0	0.0	0.0	0.0	0.0	0.0	0.0	0.06167046022525	0.0007916611690215937	0.0
11202506	0.00014717757474200002	0.0		0.0	0.0	0.0	0.0	0.0	0.00014717757474200002	0.0	0.0	0.0	0.06887532693963835	0.05058235409444615
11202514	0.0	0.0		0.0	0.0	0.00975927130774	0.0	0.0	0.0	0.0	0.0	0.0	0.04689863842649712	0.031917458476869616
11200374	0.0	0.0		0.028002687407	0.0	0.0	0.0	0.0	0.0	0.0	0.0	0.08967314763225	0.0005070136893708517	0.0
11200398	0.0	0.0		0.0260511224824	0.0	0.0	0.0	0.0	0.0	0.0	0.0	0.08369742557622001	0.0005615348619573852	0.0
11205310	0.0	0.0		7.56420513426e-05	0.0	0.0	0.0	0.0	0.0	4.21309850935e-05	0.0	0.0762063321153426	0.00037009622501913764	0.0
11200410	0.0	0.0		0.0022626096852	0.0	0.0	0.0	0.0	0.0	0.0	0.0	0.06758308085862001	0.0	0.0
11200402	0.0	0.0		0.005973426254060001	0.0	0.0	0.0	0.0	0.0	0.0	0.0	0.06662634161146001	0.0	0.0
11205658	0.0	0.0		0.0	0.0	0.0	0.0	0.0	0.0	0.0	0.0	0.0	0.05575878505705975	0.1971230173647769
11205656	0.0	0.0	0.0	0.0	0.0	0.0041782729805	0.0	0.015438123450271915	0.0	0.0	0.0	0.0	0.05924115456235265	0.2095456104425329
11205708	0.0	0.0	0.0	0.0	0.0	0.141522029372	0.0	0.3665826709927916	0.0	0.0	0.0	0.0	0.07029066517603913	0.2484973085030257
11205532	0.000606217814206	0.0		0.0	0.0	0.0	0.0	0.0	0.000606217814206	0.0	0.0	0.0	0.05484167049108979	0.11526450089946955
11205514	0.0	0.0		0.0	0.0	0.0	0.0	0.0	0.0	0.0	0.0	0.0	0.055555555555594695	0.11579591860762754
11205516	0.00145164841652	0.0		0.0	0.0	0.0	0.0	0.0	0.00145164841652	0.0	0.0	0.0	0.030360292265075563	0.06328076277650396
11205530	0.0	0.0		0.0	0.0	0.00743494423792	0.0	0.0	0.0013740463847147775	0.0	0.0	0.0	0.07590551181107709	0.15821187241571288
11205640	0.0	0.0	0.0	0.0	0.0	0.03696098562630002	0.0	0.04884459773391195	0.0009810484171317649	0.0	0.0	0.0	0.06829163534846745	0.2153977251147793
11200404	0.0	0.0		0.00779113128829	0.0	0.0	0.0	0.0	0.0	0.0	0.0	0.06844404664569001	0.0	0.0
11205312	0.0	0.0		0.0	0.0	0.0	0.0	0.0	0.0	4.21309850935e-05	0.0	0.076130690064	0.0005022601707693169	0.0
11205318	0.0	0.0		0.0183769544028	0.0	0.0015317845289799998	0.0	0.0	0.0	0.0	0.0	0.0342466567744426	0.0009860312243245128	0.0
11205388	8.00657754678e-05	0.0		0.0069516125404300005	0.0	0.0	0.0	0.0	8.00657754678e-05	0.0	0.0	0.10338943741953001	0.0	0.0
11205314	0.0	0.0		0.0	0.0	0.0	0.0	0.0	0.0	4.21309850935e-05	0.0	0.076130690064	0.0005040322580653783	0.0
11205348	0.0067347232964100005	0.0		0.0	0.0	0.0	0.0	0.0	0.0004360691830378866	4.21309850935e-05	0.0	0.1057066415997	0.0002286236854141998	0.0
11200458	0.0	0.0		0.0157940603203	0.0	0.0	0.0	0.0	0.0	4.21309850935e-05	0.0	0.035249955514642606	0.00037950664136687285	0.0
11199864	0.000615932753883	0.0		0.00014010468657899998	0.0	0.0	0.0	0.0	0.000615932753883	0.0	0.0	0.0008345366113633	0.0	0.0
11199868	0.007295630128149998	0.0		0.000176653735252	0.0	0.0	0.0	0.0	0.0030287585293638	0.0	0.0	0.0033137804130043	0.0	0.0
11205360	0.0	0.0		0.0	0.0	0.0	0.0	0.0	0.0	0.0	0.0	0.0	0.0023904382470127487	0.004778651324093775
11200450	0.0	0.0		0.0	0.0	0.0	0.0	0.0	0.0	0.0	0.0	0.0	0.0	0.0
11205358	0.000822457496161	0.0		0.0	0.0	0.0	0.0	0.0	0.0006944311021492635	0.0	0.0	0.0	0.0023397894189530746	0.004677400815082038
11205438	0.0023598821904	0.0		0.0	0.0	0.0	0.0	0.0	0.0015713346066481713	0.0	0.0	0.0	0.003974679817461387	0.02626405500167668
11205436	0.0	0.0		0.0	0.0	0.0	0.0	0.0	0.002661224303335069	0.0	0.0	0.0	0.006026785714289108	0.0398240458987477
11200448	0.0046299922641699996	0.0		0.0	0.0	0.0	0.0	0.0	0.0046299922641699996	0.0	0.0	0.0	0.002703920684994142	0.005405324390930767
11205602	0.0	0.0	0.0	0.0	0.0	0.008955223880600001	0.0	0.017902111676828914	0.0016068478670623273	0.0	0.0	0.0	0.06959884001937149	0.1849535888693812
11205560	0.0	0.0	0.0	0.0	0.0	0.0004750593824230001	0.0	0.008871873358445647	0.0	0.0	0.0	0.0	0.04539641943737623	0.17413685316247013
11205428	0.0	0.0		0.0	0.0	0.0	0.0	7.321802467922671e-05	0.0	0.0	0.0	0.0	0.007838526357046637	0.13652770297727346
11198164	0.222513775174	0.0		0.0	0.0	0.00141843971631	0.0	0.0	0.094997302077717	0.0003279783049945	0.0	0.02686142317907	0.0030725596785614816	0.0
11200006	0.0	0.0		0.0046356376733500005	0.0	0.0	0.0	0.0	0.0	0.129094666102739	0.0	1.3860504591421745	0.04278409683813069	0.0
11198140	0.0104518133784	0.0		0.0	0.0	0.0	0.0	0.0	0.003012950716561589	0.0	0.0	0.00167268935547	0.0006353240152468549	0.0
11199880	0.0	0.0		0.0	0.0	0.0	0.0	0.0	0.0	0.0	0.0	0.0032894143805563	0.0	0.0
11199866	0.0	0.0		0.0	0.0	0.0	0.0	0.0	0.0	0.0	0.0	0.0031371266777523	0.0	0.0
11199872	0.00292090870156	0.0		0.000365490486729	0.0	0.0	0.0	0.0	0.0029575765828271697	0.0	0.0	0.0031371266777523	0.0	0.0
11199876	0.0	0.0		0.0	0.0	0.0	0.0	0.0	0.0026571294051037967	0.0	0.0	0.0032894143805563	0.0	0.0
11199874	0.0	0.0		0.0	0.0	0.0	0.0	0.0	0.002850152354105284	0.0	0.0	0.0027716361910233	0.0	0.0
11199878	0.0	0.0		0.0	0.0	0.0	0.0	0.0	0.002640806227668598	0.0	0.0	0.0032894143805563	0.0	0.0
11205332	0.0	0.0		0.0	0.0	0.0	0.0	0.0	0.0	0.0	0.0	0.0	0.009250243427447728	0.11034328395575807
11200408	0.0	0.0		0.0	0.0	0.0	0.0	0.0	0.0	0.0	0.0	0.0	0.006600249065994794	0.044758832394021585
11200406	0.0	0.0		0.0	0.0	0.0	0.0	0.0	0.0	0.0	0.0	0.0	0.006453969800284729	0.04376685632294123
11200424	0.0	0.0		0.0	0.0	0.0	0.0	0.0	0.0	0.0	0.0	0.0	0.008624898291283677	0.05848875901122756
11200346	0.005809659468930001	0.0		0.0	0.0	0.000420050406049	0.0	0.0	0.005809659468930001	0.0	0.0	0.0	0.0019793870725511266	0.011711537664786038
11200316	0.00149874482697	0.0		0.0	0.0	0.0	0.0	0.0	0.00149874482697	0.0	0.0	0.0	0.0	0.0
11200294	0.0025197398968	0.0		0.0	0.0	0.0	0.0	0.0	0.0025197398968	0.0	0.0	0.0	0.0	0.0
11200252	0.000540950947729	0.0		0.0	0.0	0.0	0.0	0.0	0.000540950947729	0.0	0.0	0.0	0.0	0.0
11200234	0.0006930744523929999	0.0		0.0	0.0	0.0	0.0	0.0	0.0006930744523929999	0.0	0.0	0.0	0.0	0.0
11200232	0.0	0.0		0.0	0.0	0.0	0.0	0.0	0.0	0.0	0.0	0.0	0.0	0.0
11198134	0.0010204543381900002	0.0		0.0	0.0	0.0	0.0	0.0	0.0010204543381900002	0.0	0.0	0.0	0.00036959467783610327	0.0
11199962	0.0	0.0		0.00359398978617	0.0	0.0	0.0	0.0	0.0	0.0	0.0	0.0194075448453	0.00011249859376727437	0.0
11198142	0.0	0.0		0.0	0.0	0.0	0.0	0.0	0.0	0.0	0.0	0.00167268935547	0.0004767201652622993	0.0
11201584	0.0	0.0		0.00039594802729	0.0	0.0	0.0	0.0	0.0017471744488911987	0.0	0.0	0.017537451854873	0.00012193634922537517	0.0
11198136	0.0	0.0		0.0	0.0	0.0	0.0	0.0	0.0003943186413465802	0.0	0.0	0.0	0.0004283878337848993	0.0
11199968	0.0	0.0		0.000609150811215	0.0	0.0	0.0	0.0	0.006865217689114089	0.0	0.0	0.018146602666088002	0.00011987532965683314	0.0
11199954	0.0003481441600880001	0.0		0.00539098467925	0.0	0.0	0.0	0.0	0.0003481441600880001	0.0	0.0	0.013565788565763	0.0	0.0
11198122	0.0	0.0		0.0	0.0	0.0	0.0	0.0	0.0	0.0	0.0	0.0	0.00025201612903189263	0.0
11199884	0.012960792896700001	0.0		1.21830162243e-05	0.0	0.0	0.0	0.0	0.008211688443521926	4.2640556785e-05	0.0	0.0079067775295663	0.0003991560700234703	0.0
11199916	0.0069418011851900005	0.0		0.00675548249637	0.0	0.0	0.0	0.0	0.0069418011851900005	0.0	0.0	0.016051123875509	0.0	0.0
11199908	0.04095255302530002	0.0		0.00557372992262	0.0	0.0	0.0	0.0	0.022760016843723536	4.2640556785e-05	0.0	0.014430782717682	0.0004259462090788364	0.0
11199910	0.0007889554058099999	0.0		0.0054153507117	0.0	0.0	0.0	0.0	0.0004848489584796	5.48235730093e-05	0.0	0.014211488425643	0.00047555228913593467	0.0
11201588	0.0	0.0		4.87320648972e-05	0.0	0.0	0.0	0.0	0.0	4.2640556785e-05	0.0	0.0132185726033602	0.0005087948829772932	0.0
11199914	0.0	0.0		0.0030092050074	0.0	0.0	0.0	0.0	0.0	4.2640556785e-05	0.0	0.016227777610760198	0.000483058450072569	0.0
11199906	0.06790556292859999	0.0		0.000286300881271	0.0	0.0	0.0	0.0	0.06790556292859999	5.48235730093e-05	0.0	0.0078702284809017	0.0005596825073778012	0.0
11199918	0.0316374924964	0.0		0.00942965455761	0.0	0.0	0.0	0.0	0.0316374924964	5.48235730093e-05	0.0	0.021186265214060702	0.0004769957937645073	0.0
11200194	0.0	0.0		0.0	0.0	0.0	0.0	0.0	0.0	0.0	0.0	0.0	0.0	0.0
11200140	0.0	0.0		0.0	0.0	0.0	0.0	0.0	0.0	0.0	0.0	0.0	0.0	0.0
11200126	0.00498384036167	0.0		0.0	0.0	0.0	0.0	0.0	0.00498384036167	0.0	0.0	0.0	0.0	0.0
11200136	0.00326362274571	0.0		0.0	0.0	0.0	0.0	0.0	0.00326362274571	0.0	0.0	0.0	0.0	0.0
11200150	0.00157134159751	0.0		0.0	0.0	0.0	0.0	0.0	0.00234104848742538	0.0	0.0	0.0	0.0	0.0
11200254	0.00419717497489	0.0		0.0	0.0	0.0	0.0	0.0	0.00419717497489	0.0	0.0	0.0	0.0	0.0
11200260	0.00321573976691	0.0		0.0	0.0	0.0	0.0	0.0	0.0035969124593029428	0.0	0.0	0.0	0.0	0.0
11198104	0.0	0.0		0.0	0.0	0.00473933649289	0.0	0.0	0.0008706715394332015	0.0	0.0	0.0	0.0007836222940541013	0.0
11199930	0.0	0.0		0.00197974013645	0.0	0.0	0.0	0.0	0.0	0.0	0.0	0.025852360427954003	8.413259296628823e-05	0.0
11199948	0.0078280007036	0.0		0.0060245015229200005	0.0	0.0	0.0	0.0	0.0078280007036	0.0	0.0	0.020979153938238	0.00011185682326591743	0.0
11201580	0.0	0.0		0.00477574235993	0.0	0.0	0.0	0.0	0.0002072208134299252	0.000164242577739	0.0	0.023988130804411	0.0005259006047858533	0.0
11201586	0.00269247280104	0.0		0.00974641297944	0.0	0.0	0.0	0.0	0.00269247280104	0.129094666102739	0.0	1.338914732768108	0.0423310359016362	0.0
11199036	0.0008480158445639997	0.0		0.0	0.0	0.00017534630896000002	0.0	0.0	0.0008480158445639997	0.0	0.0	0.0	0.0007321835340056296	0.0
11198124	0.000866822276459	0.0		0.0	0.0	0.0	0.0	0.0	0.00031767324394027264	0.0	0.0	0.0	0.0002992817238622955	0.0
11199966	0.00208642279321	0.0		0.00497676212763	0.0	0.0	0.0	0.0	0.00208642279321	0.0	0.0	0.022514213982503	9.879470460356667e-05	0.0
11199912	0.0370378125174	0.0		0.00417268305682	0.0	0.0	0.0	0.0	0.033510196485505656	5.48235730093e-05	0.0	0.011756610656450698	0.0005298396031021292	0.0
11199904	0.00773629471913	0.0		0.00197974013645	0.0	0.0	0.0	0.0	0.029980871905841082	5.48235730093e-05	0.0	0.0075839275996307	0.0005629477993860443	0.0
11198074	0.0	0.0		0.00272290412613	0.0	0.0	0.0	0.0	0.0	0.0	0.0	0.003015296515513	0.0009992006394896882	0.0
11198086	0.011025583237999998	0.0		0.000335032946168	0.0	0.0	0.0	0.0	0.011025583237999998	0.0	0.0	0.013041918868107998	0.00010626992561105313	0.0
11199928	0.015224379365600001	0.0		6.70065892336e-05	0.0	0.0	0.0	0.0	0.003724412738166347	0.0	0.0	0.0158805616483726	8.951750067138216e-05	0.0
11199922	0.0036477133177399996	0.0		1.21830162243e-05	0.0	0.0	0.0	0.0	0.003189784308617723	0.0	0.0	0.0158927446645969	8.91503967192663e-05	0.0
11199920	0.00316888675463	0.0		0.00481838291671	0.0	0.0	0.0	0.0	0.00316888675463	0.0	0.0	0.0207111275813069	8.179959100204581e-05	0.0
11199926	0.00029941292591	0.0		0.00764484268075	0.0	0.0	0.0	0.0	0.00029941292591	0.0	0.0	0.023458397739889	7.735746886361956e-05	0.0
11199950	0.0	0.0		0.000298483897495	0.0	0.0	0.0	0.0	0.0	0.0	0.0	0.015253136312813003	0.00013974287311309416	0.0
11199034	0.0021429369178299997	0.0		0.007809313399779998	0.0	0.0	0.0	0.0	0.0021429369178299997	0.129094666102739	0.0	1.3335359311050805	0.04664475175694916	0.0
11198216	0.0	0.00257264549145		0.235111212969	0.0	0.005893909626720001	0.0	0.0	0.0	0.0031443444895510003	0.0	0.459217220225	0.00995208256542604	0.0
11199038	0.000110093260552	0.0		0.00355134922938	0.0	0.0	0.0	0.0	0.000110093260552	0.0	0.0	0.00355134922938	0.0	0.0
11198112	0.0	0.0		0.0	0.0	0.0	0.0	0.0	0.0	0.0	0.0	0.0	0.0	0.0
11198258	0.608710359953	0.0		0.0	0.0	0.540229885057	0.0	0.0	0.01006958159668473	0.0	0.0	0.0	0.3137836121113362	0.0
11198254	0.00367840494074	0.0		0.393471835443	0.0	0.0294412427963	0.0	0.0	0.0036301963695581953	0.0	0.0	0.393471835443	0.13514364423470349	0.0
11198238	0.0	0.0		0.0	0.0	0.0	0.0	0.0	0.0	0.0	0.0	0.393471835443	0.08641202254233736	0.0
11199932	0.0	0.0		0.000584784778766	0.0	0.0	0.0	0.0	0.0015250877891945635	0.0	0.0	0.015813555059139003	8.991188635137656e-05	0.0
11199940	0.000450497454569	0.0		0.000134013178467	0.0	0.0	0.0	0.0	0.000450497454569	0.0	0.0	0.015496796637307	8.673779165582532e-05	0.0
11199924	0.0	0.0		0.00284473428837	0.0	0.0	0.0	0.0	0.0	0.0	0.0	0.01846336108792	0.00013877324451845826	0.0
11199934	0.0	0.0		0.000182745243364	0.0	0.0	0.0	0.0	0.0	0.0	0.0	0.015545528702204	8.704735376044656e-05	0.0
11201590	0.0	0.0		0.000365490486729	0.0	0.0	0.0	0.0	0.0	0.0	0.0	0.015618626799549997	0.00015253203172666414	0.0
11199936	0.0197057575312	0.0		0.000134013178467	0.0	0.0	0.0	0.0	0.001495163631109991	0.0	0.0	0.015362783458840004	8.999280057595483e-05	0.0
11200242	0.00199187454398	0.0		0.0	0.0	8.84877444474e-05	0.0	0.0	0.00199187454398	0.0	0.0	0.0	4.989024146877207e-05	0.0
11200244	0.000951487206406	0.0		0.0	0.0	0.0	0.0	0.0	0.002295010409799549	0.0	0.0	0.0	0.0	0.0
11200266	0.00221300517091	0.0		0.0	0.0	0.0	0.0	0.0	0.00221300517091	0.0	0.0	0.0	0.0	0.0
11200286	0.0	0.0		0.0	0.0	0.0	0.0	0.0	0.0	0.0	0.0	0.0	0.0	0.0
11200304	0.0	0.0		0.0	0.0	0.0	0.0	0.0	0.0	0.0	0.0	0.0	0.0	0.0
11200428	0.043346635414	0.0		0.0	0.0	0.0	0.0	0.0	0.043346635414	0.0	0.0	0.0	0.00876033057850218	0.059407177541155924
11205442	0.0	0.0	0.0	0.0	0.0	0.00325203252033	0.0	0.0011490899821018947	0.0	0.0	0.0	0.0	0.015536723163875553	0.15931858703910987
11200444	0.0	0.0		0.0	0.0	0.0	0.0	0.0	0.0	0.0	0.0	0.0	0.12171549380857585	0.08346988774758357
11198236	0.0	0.0		0.237683858461	0.0	0.0	0.0	0.0	0.0	0.0	0.0	0.6311556939040001	0.059869848156231135	0.0
11199946	0.0382613428139	0.0		0.000408131043514	0.0	0.0	0.0	0.0	0.008364492693082034	0.0	0.0	0.023872620291504	9.576709442609672e-05	0.0
11198266	0.18953035410900002	0.0		0.0	0.0	0.224564619615	0.0	0.0	0.18953035410900002	0.0	0.0	0.0	0.2970416236673213	0.0
11198296	0.0156666369449	0.0		0.00414481773623	0.0	0.0172384365933	0.0	0.0	0.0156666369449	0.000672461756039	0.0	0.034125404359630004	0.037397931409920204	0.0
11206038	0.0	0.00020039075752700008		0.189342755824	0.0	0.0008818342151679998	0.0	0.0	0.0	0.008416411816147	0.0	0.958843264728	0.008442211055280445	0.0
11206066	0.010958441153	0.00460898742313		0.15450127405300002	0.0	0.029792746114	0.0	0.0	0.0016841408039291526	0.00821602105862	0.0	0.8109813957121002	0.010128458498028582	0.0
11206080	0.00400306222657	0.00360703363549		0.614999234851	0.0	0.0058651026393	0.0	0.0	0.0011864218226309347	0.014227743784389997	0.0	1.1786984357748	0.0379772136717871	0.0
11199938	0.00189137396484	0.0		0.00025584334071	0.0	0.0	0.0	0.0	0.002025330889251432	0.0	0.0	0.015228770280373003	9.105809506465216e-05	0.0
11205300	0.0	0.0		0.0	0.0	0.0	0.0	0.0	0.0	0.0	0.0	0.0	0.13042229244479162	0.10946306281553808
11200442	0.000546521381394	0.0		0.0	0.0	0.0	0.0	0.0	0.000546521381394	0.0	0.0	0.0	0.06401579244223345	0.0537282743458669
11208476	0.0	0.0		0.0	0.0	0.0	0.0	0.0	0.000545515690103317	0.0	0.0	0.0	0.1377845220031319	0.11564216135383552
11205298	0.0	0.0		0.0	0.0	0.0	0.0	0.0	0.0005357969752525221	0.0	0.0	0.0	0.1380778588808758	0.11588835816936985
11205304	0.0	0.0		0.0	0.0	0.0	0.0	0.0	0.0004891894590176847	0.0	0.0	0.0	0.14103758931355068	0.1183724515877254
11200378	0.00416033826666	0.0		0.0	0.0	0.0	0.0	0.0	0.00416033826666	0.0	0.0	0.0	0.02412786230212442	0.011651364993252544
11200300	0.0	0.0		0.0	0.0	0.0	0.0	0.0	0.0	0.0	0.0	0.0	0.0	0.0
11200282	0.00359714017717	0.0		0.0	0.0	0.0	0.0	0.0	0.003597140177170001	0.0	0.0	0.0	0.0	0.0
11200318	0.00148988496374	0.0		0.0	0.0	0.0	0.0	0.0	0.0011934377887374882	0.0	0.0	0.0	0.0	0.0
11206072	9.52104043883e-05	0.0314613489318		11.9022290332	0.0	0.00299681230793	0.0	0.0	9.52104043883e-05	0.0420820590807	0.0	12.4244473473157	0.008778903567381634	0.0
11206518	0.147151128562	0.0	0.0	0.0	0.0	0.7668880238150001	0.0	0.8080508254798071	0.147151128562	0.0	0.0	0.0	0.8259870782484718	0.6539761451132861
11208364	0.560765832169	0.0	0.0	0.0	0.0	0.92532717475	0.0	0.3949907220337642	0.3014326791680281	0.0	0.0	0.0	0.982622838555286	0.8654499140424344
11198278	0.004712895150229999	0.0		0.0	0.0	0.008955223880600001	0.0	0.0	0.0002776679344577998	0.000910625294636	0.0	0.0473525153211	0.05833125156133447	0.0
11198094	0.0076005645545400005	0.0		0.000511686681421	0.0	0.0	0.0	0.0	0.0013422598110164323	0.0	0.0	0.014710992090841	9.337068160597668e-05	0.0
11200308	0.000900279902778	0.0		0.0	0.0	0.0	0.0	0.0	0.000900279902778	0.0	0.0	0.0	0.0	0.0
11200328	0.0069501311352999995	0.0		0.0	0.0	0.0	0.0	0.0	0.0016685583528491734	0.0	0.0	0.0	0.0	0.0
11200336	0.0198970499065	0.0		0.0	0.0	0.0	0.0	0.0	0.002353249230172265	0.0	0.0	0.0	0.0	0.0
11200334	0.00245485968854	0.0		0.0	0.0	0.0	0.0	0.0	0.004800048994904405	0.0	0.0	0.0	0.0	0.0
11200278	0.0156207917045	0.0		0.0	0.0	0.0	0.0	0.0	0.0156207917045	0.0	0.0	0.0	0.0	0.0
11200348	0.0	0.0		0.0	0.0	0.0	0.0	0.0	0.004387329476201482	0.0	0.0	0.0	0.0	0.0
11200350	0.00480155133958	0.0		0.0	0.0	0.0	0.0	0.0	0.00480155133958	0.0	0.0	0.0	0.0	0.0
11200366	0.00548187118672	0.0		0.0	0.0	0.0	0.0	0.0	0.003827536017121515	0.0	0.0	0.0	0.02437888198756577	0.011772582610418369
11199012	0.0	0.0		0.00149241948748	0.0	0.0	0.0	0.0	0.0006829124242341771	0.0	0.0	0.01419930540942	9.54745083062832e-05	0.0
11199944	0.0	0.0		0.000261934848822	0.0	0.0	0.0	0.0	0.0019295167515215555	0.0	0.0	0.014972926939663	9.181893306399871e-05	0.0
11198088	0.00793320652354	0.0		0.000359398978617	0.0	0.0	0.0	0.0	0.0013015278361154909	0.0	0.0	0.01270688592194	0.00010802635843145837	0.0
11199010	0.00840874305094	0.0		0.00984387710923	0.0	0.0	0.0	0.0	0.004332850274219483	0.0	0.0	0.012347486943323	0.0008475229216436405	0.0
11200360	0.0048497180377499996	0.0		0.0	0.0	0.0	0.0	0.0	0.0048497180377499996	0.0	0.0	0.0	0.018012849931152316	0.00869842037759228
11200362	0.0	0.0		0.0	0.0	0.0	0.0	0.0	0.005438321068056882	0.0	0.0	0.0	0.03534443944167573	0.017067859525235096
11200280	0.0048086819861199994	0.0		0.0	0.0	0.0	0.0	0.0	0.0048086819861199994	0.0	0.0	0.0	0.0	0.0
11200298	0.00213286454849	0.0		0.0	0.0	0.0	0.0	0.0	0.002881248799655011	0.0	0.0	0.0	0.0	0.0
11200376	0.0018416852118399998	0.0		0.0	0.0	0.0	0.0	0.0	0.017001711237331695	0.0	0.0	0.0	0.03547220967011378	0.01712955987598154
11198232	0.0	0.0		0.0	0.0	0.000258131130614	0.0	0.0	0.0	0.000672461756039	0.0	0.0299805866234	0.01652837259101982	0.0
11198180	0.0	0.0		0.000164242577739	0.0	0.0	0.0	0.0	0.0	0.0	0.0	0.000164242577739	0.0016436182271606875	0.0
11200440	0.0	0.0		0.0	0.0	0.0	0.0	0.0	0.002639260205656589	0.0	0.0	0.0	0.11290723700579948	0.09476272610318033
11205302	0.0	0.0		0.0	0.0	0.0	0.0	0.0	0.0025196153146900225	0.0	0.0	0.0	0.13274853801178935	0.11141547416985033
11198078	0.0	0.0		0.0022112174447100003	0.0	0.000990099009901	0.0	0.0	0.0037776385542294213	0.0	0.0	0.0025036098340930004	0.0010947452229312107	0.0
11198076	0.0005512960369589999	0.0		0.000292392389383	0.0	0.0	0.0	0.0	0.0028470548606014732	0.0	0.0	0.020856632112583002	0.11848778238835705	0.0
11198068	0.0638257562506	0.0		0.0	0.0	0.0	0.0	0.0	0.0638257562506	0.0	0.0	0.0205642397232	0.1895438029877404	0.0
11198170	0.006682298535399999	0.0		0.0382422703624	0.0	0.00568803325312	0.0	0.0	0.006682298535399999	0.0023695826785145	0.0	0.30445753022690003	0.014734524515188287	0.0
11198168	0.00031921640888499996	0.0		0.000524765287992	0.0	0.000677048070413	0.0	0.0	0.00031921640888499996	0.0023695826785145	0.0	0.266740025152492	0.01294026908902622	0.0
11198176	0.00892774951115	0.0		0.0063627791169	0.0	0.0	0.0	0.0	0.0068079733008746465	0.0023695826785145	0.0	0.26621525986449995	0.02044763746889292	0.0
11198166	0.007702850539159999	0.0		0.0	0.0	0.015878616796	0.0	0.0	0.007702850539159999	0.0003279783049945	0.0	0.02686142317907	0.01111111111108323	0.0
11200394	0.0	0.0		0.0	0.0	0.0	0.0	0.0	0.0025991939740712122	0.0	0.0	0.0	0.06872928176800522	0.04046013976448093
11205416	0.00120796527593	0.0	0.0	0.0	0.0	0.0773780187284	0.0	0.03736591030610858	0.002110619167672336	0.0	0.0	0.0	0.07615563684740842	0.12706953619432687
11200438	0.0	0.0		0.0	0.0	0.0	0.0	0.0	0.0	0.0	0.0	0.0	0.014723760637592438	0.0
11205400	0.00337876804485	0.0		0.0	0.0	0.0211486224292	0.0	0.0	0.002352312643949331	0.0	0.0	0.0	0.058240647118343286	0.07848678168058143
11205340	0.0	0.0		0.0	0.0	1.0	0.0	0.0	0.003261882111370279	0.0	0.0	0.0	0.14686684073115527	0.04245435434781217
11200392	0.00689766976231	0.0		0.0	0.0	0.0	0.0	0.0	0.00689766976231	0.0	0.0	0.0	0.0382281553398338	0.0
11200436	0.0025656846526	0.0		0.0	0.0	0.0	0.0	0.0	0.00444963266491383	0.0	0.0	0.0	0.07701187335096606	0.0
11205296	0.0	0.0		0.0	0.0	0.0	0.0	0.0	0.003569634318404503	0.0	0.0	0.0	0.08314046644120672	0.0
11200386	0.00508892304915	0.0		0.0	0.0	0.0	0.0	0.0	0.00508892304915	0.0	0.0	0.0	0.01941535776616344	0.0
11198270	0.0	0.0		0.0	0.0	0.0024294524388	0.0	0.0	0.0	0.000672461756039	0.0	0.0299805866234	0.03741467936294637	0.0
11198182	0.0	3.27978304995e-05		0.0134143126743	0.0	0.0023923444976100003	0.0	0.0	0.0860875495614952	0.0023695826785145	0.0	0.25985248074760003	0.02124300272712028	0.0
11208360	0.536109407258	0.0	0.0	0.0	0.0	0.926126126126	0.0	1.0	0.536109407258	0.0	0.0	0.0	0.9682826199071144	0.9639006844373672
11206576	0.0	0.0	0.0	0.0	0.0	1.0	0.0	1.0	0.03502185623708802	0.0	0.0	0.0	1.0	0.9405549274938896
11206222	0.0	0.0	0.0	0.0	0.0	0.217188823031	0.0	0.4163907363472448	0.0	0.0	0.0	0.0	0.4788210033182192	0.6728480004500889
11199032	0.0	0.0		0.0	0.0	0.000114665749341	0.0	0.0	0.0	0.0	0.0	0.0	5.799791207533122e-05	0.0
11199030	0.00100044580509	0.0		0.0	0.0	0.0	0.0	0.0	0.00100044580509	0.0	0.0	0.0	0.0004465780953443296	0.0
11206068	0.0	0.0		0.873048532929	0.0	0.0	0.0	0.0	0.0	0.00360703363549	0.0	1.5295286545881	0.0017042226850986276	0.0
25221621	0.0	0.0		0.0	0.0	0.0	0.0	0.0	0.00027631859962805295	0.0044085966656	0.0	0.154582643067	0.007982969664714571	0.0
11206034	0.0214196247271	0.0034066428779600004		0.0208406387828	0.0	0.163461538462	0.0	0.0	0.0005017209395536936	0.01162266393658	0.0	0.7903411476868001	0.01470215462612616	0.0
11206016	0.0110130116539	0.0044085966656		0.154582643067	0.0	0.00645342312009	0.0	0.0	0.010013842359607577	0.016031260602180002	0.0	0.9449237907538	0.010787055533369084	0.0
11205954	0.0	0.0		0.0	0.0	0.0382513661202	0.0	0.0	0.00026495793826387997	0.0044085966656	0.0	0.154582643067	0.008006405124098575	0.0
11206044	0.0	0.010420319391399998		0.5713673158899999	0.0	0.0123711340206	0.0	0.0	0.0	0.023445718630669996	0.0	1.263516992389	0.014964391958902841	0.0
11209924	0.00202447599429	0.00087652279035		0.0440521225355	0.0	0.0138323840521	0.0	0.0	0.00029581274485583284	0.006345733556376999	0.0	0.7658378464003299	0.010815855934950994	0.0
11200352	0.0	6.05136410741e-05		0.005113402670760001	0.0	0.006211180124220001	0.0	0.0	0.0	6.05136410741e-05	0.0	0.005113402670760001	0.0015030060120232766	0.0
11198438	0.0	0.0		0.0	0.0	0.0033994334277600005	0.0	0.0	0.0	0.0	0.0	0.0	0.001856877588914761	0.0
11200356	0.0	0.0		0.00499237538861	0.0	0.0010395010395	0.0	0.0	0.0	0.0	0.0	0.00499237538861	0.0004820438659915207	0.0
11198422	0.0	0.0		0.0	0.0	0.000545553737043	0.0	0.0	7.94796543385235e-05	0.0	0.0	0.0	0.00033613445378138804	0.0
11200354	0.0012802668644800001	0.0		0.0	0.0	0.0	0.0	0.0	0.0002064946555612904	0.0	0.0	0.0	0.0003137747097583367	0.0
11198432	0.0	0.0		0.0	0.0	0.0	0.0	0.0	0.0	0.0	0.0	0.0	0.0002155172413791896	0.0
11198494	0.0	0.0		0.0	0.0	0.00033921302577999987	0.0	0.0	0.0	0.0	0.0	0.0	0.00011595547309826529	0.0
11209770	0.00196862332634	0.0		0.22356717306	0.0	0.0	0.0	0.0	0.004656573246387156	0.0573366545759	0.37031419485	279.29735896606	0.04913042470503412	0.21617139106112512
11207832	0.0037617838449	4.47547427029e-05		0.12412070834	0.0	0.0008113590263689999	0.0	0.0	0.0015337077700427555	0.0016559254800074	0.0007832079973010001	0.6945143545613929	0.004370422867938828	0.0020118134334263533
11209744	0.00042740142825900004	0.0		0.400073940102	0.0	0.0	0.0	0.0	0.00042740142825900004	0.0	0.0	1.810041925772	0.0	0.0
11209808	0.0	0.0		0.499517780067	0.0	0.0	0.0	0.0	0.0	0.0	0.0	6.385061033207	0.0015673981191241242	0.017779045412334774
11209816	0.000114705129244	0.0		0.179410236822	0.0	0.0	0.0	0.0	0.000114705129244	0.0	0.0	131.5469591936714	0.0	0.0
11209726	0.0	0.0		0.220542725372	0.0	0.0	0.0	0.0	0.0	0.0	0.0	1.630510711042	0.0	0.0
11209922	0.0	0.00384689232669		5.7291392986300025	0.0	0.0028281713458	0.0	0.0	0.0	0.00384689232669	0.0	5.7291392986300025	0.002828171345800001	0.0
11209832	0.0	2.23773713515e-05	0.0	0.111193158245	0.0	0.021021021021	0.0	0.010726680776550123	0.0	2.23773713515e-05	0.0	0.26172463573800003	0.03559572779099219	0.032712424712867706
11202418	0.0	0.0		0.0	0.0	0.0	0.0	0.0	0.0	0.0	0.0	0.0	0.0	0.0
11198502	0.0	0.0		0.0	0.0	0.0	0.0	0.0	0.0	0.0	0.0	0.0	0.0	0.0
11202386	0.0	0.0		0.0	0.0	0.0	0.0	0.0	0.0	0.0	0.0	0.0	0.0	0.0
11202392	0.0	0.0		0.0	0.0	0.0	0.0	0.0	0.0	0.0	0.0	0.0	0.0	0.0
11198504	0.0	0.0		0.000126392955281	0.0	0.0	0.0	0.0	0.0	0.0	0.0	0.000126392955281	0.0	0.0
11202430	0.0	0.0		0.0	0.0	0.0	0.0	0.0	0.0	0.0	0.0	0.0	0.0	0.0
11198496	0.0	0.0		0.0	0.0	0.0	0.0	0.0	0.0	0.0	0.0	0.0	0.0	0.0
11218592	0.0	0.0		0.0	0.0	0.0	0.0	0.0	0.0	0.0	0.0	0.0	0.0	0.0
11202360	0.0	0.0		0.0	0.0	0.0	0.0	0.0	0.0	0.0	0.0	0.0	0.0	0.0
11209872	0.00023491031588499997	0.0		0.877452763096	0.0	0.0	0.0	0.0	0.00023491031588499997	0.0	0.0	1.2487581276583999	0.0	0.0
11210996	0.0	0.00011188685675700005		0.328786192493	0.0	0.00070731362286	0.0	0.0	0.00023690596945164766	0.018483708736287	0.041912816541314006	1.1325186686415	0.0221052816839632	0.042295223989361
11209844	0.0	0.0		0.292161646612	0.0	0.0	0.0	0.0	0.0	0.0	0.0	0.786114442934	0.0	0.0
11209762	0.0	0.0		0.01161387912	0.0	0.0	0.0	0.0	0.0	0.0573366545759	0.37031419485	279.31792521033503	0.048782171761706655	0.2146390956728356
11209870	0.0	0.000484011470689	0.00119389496103	0.073505208682	0.0	0.00152037299818	0.0	0.00361489062204065	0.0	0.10907575635068904	1.02964255181103	19.878356480982	0.020764846934317044	0.12566904796988526
11207790	0.0	0.0		0.236118107394	0.0	0.0	0.0	0.0	0.0	0.0008279627400033999	0.0	1.3814099176888028	0.002376822766106167	0.0
11209812	0.009374038388129998	0.0		0.207235155547	0.0	0.0	0.0	0.0	0.007135559515445348	0.0	0.0	131.335247855547	0.0	0.0
11198346	0.8789565475309999	0.0		0.0	0.0	0.7971014492749999	0.0	0.0	0.7194176952223704	0.00127487541249	0.0	0.0394931185474	0.1991991991987838	0.0
11202416	0.0	0.0		0.0	0.0	0.0	0.0	0.0	0.0	0.0	0.0	0.0	0.0	0.0
11198500	0.0	0.0		0.0	0.0	0.0	0.0	0.0	0.0	0.0	0.0	0.0	0.0	0.0
11202356	0.0	0.0		0.0	0.0	0.0	0.0	0.0	0.0	0.0	0.0	0.0	0.0	0.0
11198498	0.0	0.0		0.0	0.0	0.0	0.0	0.0	0.0	0.0	0.0	0.0	0.0	0.0
11209964	0.0015034382872200001	0.00519300929955		0.712678071348	0.0	0.0101331094855	0.0	0.0	0.0011908128652425686	0.01680688841953	0.000241955815	1.0585539088898	0.0235271553239446	0.002606037004710622
11209928	0.0	0.000276201466477		0.00910765251683	0.0	0.0358306188925	0.0	0.0	0.00161984439907709	0.005469210766027001	0.0	0.72178572386483	0.010597586105338036	0.0
11202432	0.0	0.0		0.0	0.0	0.0	0.0	0.0	0.0	0.0	0.0	0.0	0.0	0.0
11202438	0.0	0.0		0.0	0.0	0.0	0.0	0.0	0.0	0.0	0.0	0.0	0.0011550678602388106	0.0
11207828	0.00719267083972	0.0		0.368095670245	0.0	0.0	0.0	0.0	0.00719267083972	0.0009174722254095	0.0	0.63331654353221	0.003428380299357245	0.0
11211000	0.000119992695408	8.95094854059e-05		0.08821361737500001	0.0	0.00074892342258	0.0	0.0	0.0014294015458699628	0.017924274452500902	0.041912816541314006	0.7505434839534999	0.02573752325996973	0.05024508837423953
11209856	0.0	0.0		0.493952796322	0.0	0.0	0.0	0.0	0.0	0.0	0.0	0.8652581608844	0.0	0.0
11209810	0.0	0.0		0.182676640325	0.0	0.0	0.0	0.0	0.0	0.0	0.0	131.31068934032498	0.0	0.0
11211002	0.00154187676334	2.23773713515e-05		0.0539472063865	0.0	0.000205507603781	0.0	0.0	0.00154187676334	0.0178571423384465	0.041912816541314006	0.71336801468931	0.026003726918539114	0.050888792390553585
11209864	0.0	0.0	0.0	0.0	0.0	0.0379901960784	0.0	0.0233263524813869	0.0	0.1362126661407	1.0607160882293	20.44456144841	0.02613978352427193	0.11668781604750846
11211008	0.004152193847280001	0.0		0.626181649219	0.0	0.0	0.0	0.0	0.004776223340257564	0.000362933722499	0.0	1.256234591478	0.00021481123462757364	0.0
11207816	0.0	0.0		0.00587817975611	0.0	0.0	0.0	0.0	0.0	2.23773713515e-05	0.0	0.6269555835612202	0.00022128789555219083	0.0
11209756	0.0	0.0		0.176264811227	0.0	0.0	0.0	0.0	0.0	0.0573366545759	0.37031419485	279.473623777287	0.047643308284176115	0.20962815380444053
11202450	0.0	0.0		0.0	0.0	0.0	0.0	0.0	0.0	0.0	0.0	0.0	0.0019267822736064547	0.0
11198506	0.0	0.0		0.0198436939791	0.0	0.0	0.0	0.0	0.0	0.0	0.0	0.02350908968224	0.0027542789691122533	0.0
11202366	0.0	0.0		0.00256999009071	0.0	0.0	0.0	0.0	0.0	0.0	0.0	0.00256999009071	0.0032158033765929905	0.0
11204702	0.0	0.0		0.00109540561243	0.0	0.0	0.0	0.0	0.0	0.0	0.0	0.0036653957031400003	0.00311665182546696	0.0
11205308	0.0	0.0		0.0137347011405	0.0	0.0	0.0	0.0	0.0	0.0	0.0	0.0411198414513	0.0	0.0
11202376	0.0	0.0		0.027385140310800003	0.0	0.0	0.0	0.0	0.0	0.0	0.0	0.027385140310800003	0.0030039695311656657	0.0
11202424	0.0	0.0		0.0	0.0	0.0	0.0	0.0	0.0	0.0	0.0	0.0	0.003265686960577929	0.0
11205320	0.0	0.0		0.0217395883083	0.0	0.0	0.0	0.0	0.0	0.0	0.0	0.06681974235839999	0.002529587135242133	0.0
11209884	0.00630769572094	0.0		0.154246832062	0.0	0.0	0.0	0.0	0.00630769572094	0.000362933722499	0.0	1.255871657755	0.0001632653061223875	0.0
11209834	0.00910725533775	0.000362933722499		0.475443176474	0.0	0.000394840747565	0.0	0.0	0.006567090339819334	0.000362933722499	0.0	0.8695891991084	0.0002482775743281018	0.0
11209694	0.0	2.23773713515e-05		4.47547427029e-05	0.0	0.5	0.0	0.0	0.0	0.0187522371925045	0.041912816541314006	0.8179197295853029	0.025166719593543697	0.04769713265821497
11209860	0.0	0.0		0.0296395873374	0.0	0.0	0.0	0.0	0.00022636587107948336	0.0	0.0	0.37130536456240004	0.0	0.0
11199994	0.000588363746076	0.0		0.00813216332972	0.0	0.0	0.0	0.0	0.000588363746076	0.0	0.0	0.01943191087775	0.0	0.0
11199996	0.0	0.0		0.00174217132007	0.0	0.0	0.0	0.0	0.0002800503762775013	0.000164242577739	0.0	0.08255152639685401	8.827683615844581e-05	0.0
11200022	0.011896848589399999	0.0		0.011281473023700002	0.0	0.0	0.0	0.0	0.011896848589399999	0.000164242577739	0.0	0.09029992471551401	7.810669374387832e-05	0.0
11209826	0.0060325064018400005	0.0		0.15460976578500002	0.0	0.00029708853238300003	0.0	0.0	0.007846080244127071	0.0	0.0	131.5221587226344	6.566419331546247e-05	0.0
11209818	0.00245247045435	0.0	0.0	5.88554325314	0.0	0.00246981339188	0.0	0.02801516980176352	0.0017703649634808636	0.0	0.0	5.88554325314	0.00246981339188	0.02801516980176352
11200002	0.00402936253212	0.0		0.016038940859299997	0.0	0.0	0.0	0.0	0.00402936253212	0.000164242577739	0.0	0.095057392551114	6.383250351097115e-05	0.0
11202434	0.0	0.0		0.0450801540501	0.0	0.0	0.0	0.0	0.0	0.0	0.0	0.0450801540501	0.0028466856445704732	0.0
11202442	0.0	0.0		0.0	0.0	0.0	0.0	0.0	0.0	0.0	0.0	0.0	0.003477828841137147	0.0
11202460	0.0	0.0		0.08346148147030001	0.0	0.00051719679338	0.0	0.0	0.0	0.0	0.0	0.08346148147030001	0.002706604114037859	0.0
11205350	0.0	0.0		0.0184955024561	0.0	0.0	0.0	0.0	0.0	0.0	0.0	0.1019569839264	0.002598977735423688	0.0
11202488	0.0	0.0		0.0	0.0	0.00387972841901	0.0	0.0	0.0	0.0	0.0	0.0	0.0038302277432721694	0.0
11198490	0.0	0.0		0.0	0.0	0.00952380952381	0.0	0.0	0.0	0.0	0.0	0.0	0.0004164931278634112	0.0
11202448	0.0	0.0		0.0	0.0	0.0	0.0	0.0	0.0	0.0	0.0	0.0	0.001558846453627046	0.0
11202478	0.0	0.0		0.0	0.0	0.0	0.0	0.0	0.0	0.0	0.0	0.0	0.002101821578704811	0.0
11198268	0.0	0.0		0.0604571690492	0.0	0.0	0.0	0.0	0.0	0.0	0.0	0.0604571690492	0.12151270923757684	0.0
11200018	0.006319057977569999	0.0		0.00526915451701	0.0	0.0	0.0	0.0	0.0090803181227186	0.129094666102739	0.0	1.3891814943118144	0.03945532406291742	0.0
11199986	0.0	0.0		0.0056102789712900005	0.0	0.0	0.0	0.0	0.0	0.000164242577739	0.0	0.08641963404807401	8.075587499013759e-05	0.0
11199988	0.030268616451400002	0.0		0.00122439313054	0.0	0.0	0.0	0.0	0.0076647948110803235	0.000164242577739	0.0	0.080809355076784	9.61353585851638e-05	0.0
11199998	0.0	0.0		0.00583566477144	0.0	0.0	0.0	0.0	0.0027390044858039194	0.129094666102739	0.0	1.3897480045662445	0.03996880483523167	0.0
11200004	0.0	0.0		0.00249751832598	0.0	0.0	0.0	0.0	0.0028653438546094663	0.129094666102739	0.0	1.3839123397948043	0.04484304932733308	0.0
11207810	0.0	0.0		0.0661698870863	0.0	0.0	0.0	0.0	0.0	0.0013650196524384	0.0	0.7308721588121029	0.0031764215788371818	0.0
11198322	0.266176452767	0.0		0.0	0.0	0.523489932886	0.0	0.0	0.6758879820045941	0.00127487541249	0.0	0.0394931185474	0.2085925349918233	0.0
11200016	0.0	0.0		0.000663974384224	0.0	0.0	0.0	0.0	0.0	0.129094666102739	0.0	1.3814148214688242	0.04682236053215398	0.0
11202510	0.0	0.0		0.0	0.0	0.0	0.0	0.0	0.0	0.0	0.0	0.0	0.005704506560187516	0.0
11202538	0.0	0.0		0.0104484843032	0.0	0.00283865856879	0.0	0.0	0.0	0.0	0.0	0.0104484843032	0.003270494585174146	0.0
11202512	0.0	0.0		0.0	0.0	0.020942408377	0.0	0.0	0.0	0.0	0.0	0.0	0.004766444232606633	0.0
11202394	0.0	0.0		0.0	0.0	0.00194931773879	0.0	0.0	0.0	0.0	0.0	0.0	0.0007256894049340082	0.0
11198488	0.0	0.0		0.0	0.0	0.005068226120859999	0.0	0.0	0.0	0.0	0.0	0.0	0.0024461091576216307	0.0
11202484	0.0	0.0		0.0	0.0	0.00033898305084699995	0.0	0.0	0.0	0.0	0.0	0.0	0.001921939680662637	0.0
11202486	0.0	0.0		0.0	0.0	0.0	0.0	0.0	0.0	0.0	0.0	0.0	0.003146303093865608	0.0
11202494	0.0	0.0		0.0	0.0	0.0	0.0	0.0	0.0	0.0	0.0	0.0	0.003168735146554906	0.0
11198056	0.0	0.0		0.0	0.0	0.0	0.0	0.0	0.000369972024160623	0.0	0.0	0.0	0.003440621531632708	0.0
11209704	0.0008729440621419999	0.0		0.0436948772622	0.0	0.0	0.0	0.0	0.0008729440621419999	0.0006489437691919999	0.0	0.5138836793252001	0.0017095024758318725	0.0
11198130	0.0037555477171900002	0.000164242577739		0.0705878044646	0.0	0.000149835181301	0.0	0.0	0.00213478625879619	0.129094666102739	0.0	1.3807508470846002	0.04794760846682334	0.0
11209862	0.0	0.0		0.341665777225	0.0	0.0	0.0	0.0	0.0	0.0	0.0	0.341665777225	0.0	0.0
11198158	0.0	0.000821212888695		0.502418045304	0.0	0.0015867978419500002	0.0	0.0	0.0	0.104653440241695	0.0	1.638997766394	0.09918208528538447	0.0
11200098	0.0	0.00128598920128		0.0287369125363	0.0	0.0258531540848	0.0	0.0	0.0	0.00128598920128	0.0	0.0449211950254	0.03194001653091449	0.0
11200048	0.000144765272806	0.0		0.143845707495	0.0	0.0	0.0	0.0	0.000144765272806	0.0001236528078152	0.0	0.4394129184	0.00038296568627444046	0.0
11200042	0.07886526731650001	0.0		0.061599133008699986	0.0	0.0	0.0	0.0	0.07886526731650001	0.0001236528078152	0.0	0.4687790726376999	0.00044196941571635247	0.0
11200034	0.0	0.0		0.179485342389	0.0	0.0	0.0	0.0	0.0	0.0001236528078152	0.0	0.7974679236099999	0.00031403090064056617	0.0
11201572	0.007690314309829999	0.0		0.232656084634	0.0	0.0	0.0	0.0	0.007690314309829999	4.94611231261e-05	0.0	1.3205324074373102	9.86290561199645e-05	0.0
11199016	0.00024526141288299996	0.0		0.0	0.0	0.0	0.0	0.0	0.00024526141288299996	0.0	0.0	0.006133194303399999	0.008760107816713814	0.0
11198332	0.0	0.0007985483352969999		0.00997484938125	0.0	0.08005617977530001	0.0	0.0	0.004876506720235178	0.019798518470497	0.0	0.80678991717125	0.03778123258339306	0.0
11199074	0.00268528154169	0.0189999701352		0.79681506779	0.0	0.0368794751191	0.0	0.0	0.002629198691152225	0.05894015907057	0.0232240393188	6.198982666632918	0.05019343986545601	0.021794860801722892
11198394	0.0010525838578099998	0.00575795378609		0.05773364368	0.0	0.0997330744965	0.0	0.0	0.0051646484882601216	0.01343240689494	0.0	0.0710380996088	0.31834989600171304	0.0
11198116	0.0	0.0		0.0	0.0	0.0	0.0	0.0	0.0012950078781836837	0.0	0.0	0.0192195286727	0.016226240148357968	0.0
11198194	0.030393459750599996	0.000262382643996		0.166383394124	0.0	0.00152468076996	0.0	0.0	0.030393459750599993	0.0023039870175160003	0.0	0.401047141048	0.012765585380766734	0.0
11198148	0.00977756507383	0.0		0.00370615484644	0.0	0.0	0.0	0.0	0.00977756507383	0.000131191321998	0.0	0.12987940877743598	0.00036088054853829085	0.0
11198146	0.000806795133544	0.0		0.00977375348884	0.0	0.0	0.0	0.0	0.000806795133544	0.000131191321998	0.0	0.13594700741983598	0.0002774694783572709	0.0
11200020	0.0030815268372800003	0.0		0.36520363294	0.0	0.0	0.0	0.0	0.0030815268372800003	4.94611231261e-05	0.0	1.4530799557433098	9.908838684109396e-05	0.0
11200026	0.0138178964701	0.0		0.312477062202	0.0	0.0	0.0	0.0	0.010904326654382741	7.41916846891e-05	0.0	1.32649119488631	0.00013712405155867513	0.0
11200030	0.0616973831893	4.94611231261e-05		0.00541599298231	0.0	0.00757575757576	0.0	0.0	0.01200943353795107	7.41916846891e-05	0.0	1.0140141326843102	0.00019166879632000344	0.0
11200028	0.000757196081344	0.0		0.178227110511	0.0	0.0	0.0	0.0	0.000757196081344	2.4730561563e-05	0.0	1.1868252502130001	5.613562366678197e-05	0.0
11200032	0.00417907146644	0.0		0.559180626027	0.0	0.0	0.0	0.0	0.010566784579557757	0.0001236528078152	0.0	1.177163207248	0.0002598212429847794	0.0
11200040	0.00445069460754	0.0		0.210802641592	0.0	0.0	0.0	0.0	0.002641619238237138	0.0001236528078152	0.0	0.6179825812209999	0.0003581148832544832	0.0
11200046	0.014749217339700001	0.0		0.111612728724	0.0	0.0	0.0	0.0	0.008499060911500515	0.0001236528078152	0.0	0.407179939629	0.00045045045045036887	0.0
11200058	0.00699137334094	2.4730561563e-05		0.12700214335899998	0.0	0.000195198126098	0.0	0.0	0.009262823799439442	0.0034622786188252	0.0	1.6589083986128	0.004055984004566682	0.0
11200072	0.19052023402100002	0.0		0.0431548299275	0.0	0.0	0.0	0.0	0.19052023402100002	0.00333862581101	0.0	1.4064960176353	0.004921330555351694	0.0
11198172	0.00987742110913	0.0		0.0155789694873	0.0	0.0	0.0	0.0	0.01983277021917395	0.0013915185009000005	0.0	0.5237370774153	0.004675437642710724	0.0
11198138	0.297026917895	0.0		0.006133194303399999	0.0	0.0310412573674	0.0	0.0	0.15504980421774753	0.000131191321998	0.0	0.15050924416161	0.0099324185951293	0.0
11198048	0.0	0.0		0.0	0.0	0.0	0.0	0.0	0.0	0.0	0.0	0.0	0.0026926083557726656	0.0
11198090	0.00158111610812	0.0		0.0	0.0	0.0178699070765	0.0	0.0	0.001171919632115603	0.0	0.0	0.0	0.02043390514633114	0.0
11198080	0.0	0.0		0.0	0.0	0.000829015544041	0.0	0.0	0.0	0.0	0.0	0.0	0.010685599541029628	0.0
11199040	0.006374442798680001	0.0		0.08230466738310001	0.0	0.00017755231452100002	0.0	0.0	0.006374442798680001	0.000131191321998	0.0	0.22668071724131	0.0005359516357241815	0.0
11209880	0.000110439885422	0.0		0.244980262687	0.0	0.0	0.0	0.0	0.000110439885422	0.00384689232669	0.0	6.147964814394003	0.0019201049032952094	0.0
11199984	0.00105898844608	0.0		0.00203456370946	0.0	0.0	0.0	0.0	0.00105898844608	0.000164242577739	0.0	0.08161952565570399	9.397613006323408e-05	0.0
11198286	0.0026848329777199994	0.0		0.0658883095311	0.0	0.00791672775253	0.0	0.0	0.0026848329777199994	0.0	0.0	0.0658883095311	0.1292270531401951	0.0
11200108	0.0	0.0		0.045355849906599986	0.0	0.0	0.0	0.0	0.0	0.00671746322769	0.0	0.15469328329360002	0.030521407376028188	0.0
11200102	0.0	0.0		0.0150609119919	0.0	0.0	0.0	0.0	0.0	0.0	0.0	0.1353998245579	0.0	0.0
[truncated: 93,144 more rows]
